# Supplementary material for: Exploring Tumor Immune Microenvironment and Its Associations With Molecular Characteristics in Melanoma
Source: Front Oncol. 2022 Apr 21;12:821578. doi: 10.3389/fonc.2022.821578 (PMC9069107; doi:10.3389/fonc.2022.821578)
Supplement: Supplementary file 4 [file Table_3.xlsx]

## Sheet: differential expression genes
Table S3. The differential gene expressions between the high-immunity and low-immunity cohorts
gene_name	baseMean	log2FoldChange	lfcSE	stat	pvalue	padj
A1BG	272.618	0.103194	0.106422	0.96967	0.332211	0.463511
A1CF	0.391916	-0.109661	0.391784	-0.279902	0.779553	0.855515
A2M	34937.1	0.204266	0.123005	1.66063	0.0967875	0.175872
A2ML1	121.373	-3.71453	0.327837	-11.3304	9.27922e-30	4.77124e-28
A4GALT	147.231	-0.510651	0.132273	-3.86059	0.000113115	0.00048754
A4GNT	1.4741	-0.302779	0.15948	-1.89853	0.0576257	0.114455
AAAS	955.174	-0.0445898	0.0516776	-0.862845	0.388222	0.520801
AACS	534.318	-0.27142	0.0691	-3.92794	8.56781e-05	0.000378819
AADAC	4.21374	-0.714002	0.31726	-2.25053	0.0244155	0.0553674
AADACL2	6.47745	-4.01739	0.495202	-8.11264	4.95326e-16	8.4987e-15
AADACL3	0.976492	-2.17808	0.925704	-2.35289	0.0186283	0.0440175
AADACL4	0.223836	-0.324588	0.482222	-0.673109	0.500878	0.626643
AADAT	101.424	-0.653312	0.10882	-6.00359	1.92997e-09	1.74206e-08
AAGAB	866.691	0.094072	0.0410316	2.29267	0.021867	0.0503185
AAK1	839.015	-0.00155762	0.0577437	-0.0269748	0.97848	0.986943
AAMP	2481.21	-0.0730961	0.0451603	-1.61859	0.105535	0.18868
AANAT	1.72808	0.533633	0.131001	4.07352	4.63081e-05	0.000216526
AARS2	1053.64	-0.121959	0.0681829	-1.7887	0.0736632	0.140666
AARSD1	629.68	-0.0785772	0.0534752	-1.46941	0.141721	0.239309
AASDH	255.104	0.172609	0.0557531	3.09596	0.00196176	0.00625075
AASDHPPT	831.764	-0.0809811	0.0659128	-1.22861	0.219218	0.337036
AASS	614.978	-0.0539953	0.0833779	-0.647597	0.517245	0.641633
AATF	1713.21	0.0419493	0.0519898	0.806876	0.419738	0.552488
AATK	445.909	-0.215552	0.131757	-1.63597	0.101845	0.183323
ABAT	143.14	0.00848469	0.124553	0.068121	0.945689	0.967635
ABCA1	1082.31	0.0303531	0.104903	0.289344	0.772318	0.850358
ABCA10	30.5742	-0.586711	0.130805	-4.48538	7.27839e-06	4.002e-05
ABCA11P	73.2311	-0.123051	0.0851499	-1.44511	0.148428	0.24829
ABCA12	40.2907	-3.34866	0.258223	-12.9681	1.85593e-38	2.08877e-36
ABCA13	60.2669	-0.878273	0.197512	-4.44669	8.72023e-06	4.72537e-05
ABCA17P	21.8952	0.578185	0.175989	3.28535	0.00101856	0.00350947
ABCA2	1644.05	-0.0486725	0.0903488	-0.538717	0.590082	0.706763
ABCA3	844.64	-0.122392	0.142129	-0.861135	0.389163	0.521803
ABCA4	10.9902	-0.877254	0.15779	-5.55963	2.70352e-08	2.12661e-07
ABCA5	536.77	0.100462	0.101634	0.988473	0.322921	0.453815
ABCA6	273.397	-0.519985	0.185137	-2.80865	0.00497492	0.014229
ABCA7	513.643	0.491146	0.0922644	5.32324	1.01935e-07	7.36994e-07
ABCA8	540.154	-0.647447	0.22028	-2.9392	0.00329059	0.0098822
ABCA9	141.145	-0.226099	0.162644	-1.39014	0.164486	0.269035
ABCB1	105.186	1.42846	0.160614	8.89371	5.91034e-19	1.2889e-17
ABCB10	398.323	-0.0566994	0.0593926	-0.954654	0.339753	0.471662
ABCB11	1.64162	0.861912	0.203871	4.22772	2.36067e-05	0.000117807
ABCB4	257.588	0.268915	0.160234	1.67827	0.0932951	0.170702
ABCB5	1251.96	0.320875	0.216241	1.48388	0.137841	0.234059
ABCB6	844.375	-0.319806	0.0802404	-3.9856	6.731e-05	0.00030498
ABCB7	394.716	0.0319616	0.0460698	0.693765	0.487829	0.614522
ABCB8	1087.82	-0.0319276	0.0793119	-0.402557	0.687274	0.786811
ABCB9	253.92	-0.35924	0.0951279	-3.77639	0.000159119	0.00066395
ABCC1	1175.33	-0.225932	0.0739917	-3.05348	0.00226204	0.00708689
ABCC10	731.946	-0.0310616	0.0616829	-0.50357	0.614564	0.727585
ABCC11	121.124	0.0617619	0.194387	0.317726	0.750693	0.835162
ABCC12	2.29053	-0.0859228	0.366323	-0.234555	0.814554	0.879584
ABCC13	0.564687	-0.881949	0.361951	-2.43665	0.014824	0.036192
ABCC2	507.885	0.0908844	0.171956	0.528533	0.59713	0.712236
ABCC3	143.68	0.787309	0.146298	5.38153	7.38541e-08	5.45233e-07
ABCC4	354.354	-0.420781	0.0988891	-4.25508	2.08972e-05	0.000105761
ABCC5	1225.36	-0.111493	0.0653603	-1.70583	0.0880405	0.162977
ABCC6	7.70927	-0.540472	0.155038	-3.48607	0.000490179	0.00182996
ABCC6P1	0.710395	-0.969697	0.327858	-2.95767	0.0030997	0.00937893
ABCC6P2	3.00323	-0.828367	0.189247	-4.37718	1.20223e-05	6.34797e-05
ABCC8	3.13618	-1.48663	0.314798	-4.7225	2.32967e-06	1.37946e-05
ABCC9	143.7	-0.761926	0.13416	-5.67924	1.35293e-08	1.11148e-07
ABCD1	2130.3	0.0748486	0.115901	0.645801	0.518409	0.64268
ABCD2	24.4152	1.72359	0.147872	11.656	2.13801e-31	1.26971e-29
ABCD3	1041.2	-0.10727	0.0562726	-1.90625	0.0566178	0.112801
ABCD4	582.746	0.0471711	0.0451739	1.04421	0.296387	0.425063
ABCE1	1581.23	-0.119441	0.0548691	-2.17684	0.0294928	0.0651645
ABCF1	2841.63	-0.120739	0.0558587	-2.1615	0.0306565	0.0674301
ABCF2	1695.68	-0.268467	0.077763	-3.45238	0.000555669	0.0020441
ABCF3	1304.19	-0.0325255	0.0545679	-0.596056	0.551138	0.672378
ABCG1	392.758	0.548914	0.111346	4.92981	8.23101e-07	5.284e-06
ABCG2	78.3667	0.0797824	0.126306	0.631658	0.52761	0.650779
ABCG4	9.26671	-1.3567	0.166527	-8.147	3.73049e-16	6.4419e-15
ABCG5	9.64326	-0.317992	0.16835	-1.88887	0.0589089	0.116586
ABCG8	0.677574	-0.428589	0.250134	-1.71344	0.0866323	0.16088
ABHD1	10.4522	-0.431147	0.121327	-3.55361	0.000379987	0.00145055
ABHD10	555.202	0.00224748	0.0621254	0.0361765	0.971142	0.982435
ABHD11	374.273	-0.221308	0.07895	-2.80314	0.00506082	0.014449
ABHD12	2158.42	0.168201	0.0625837	2.68761	0.00719658	0.0195348
ABHD12B	24.2329	-0.0863527	0.216224	-0.399368	0.689622	0.78849
ABHD13	410.646	0.133473	0.0606906	2.19925	0.0278604	0.0621119
ABHD14A	347.976	-0.0638789	0.0923943	-0.691373	0.489331	0.615883
ABHD14B	1742.41	0.0410181	0.101076	0.405814	0.684879	0.785131
ABHD15	333.599	0.146007	0.0691576	2.11122	0.0347536	0.0749966
ABHD2	4121.35	0.000159011	0.102648	0.00154909	0.998764	0.999261
ABHD3	255.243	0.507559	0.0695943	7.29311	3.02875e-13	4.07906e-12
ABHD4	793.218	0.082151	0.0699207	1.17492	0.240028	0.361631
ABHD5	398.517	-0.0814976	0.0548608	-1.48553	0.137402	0.233501
ABHD6	421.793	0.149989	0.0852309	1.75979	0.0784427	0.148158
ABHD8	247.954	0.19432	0.08011	2.42567	0.0152803	0.0371481
ABI1	1196.2	0.227394	0.0518819	4.38292	1.171e-05	6.20548e-05
ABI2	1256.39	-0.293461	0.0622692	-4.71278	2.44364e-06	1.44323e-05
ABI3	248.728	1.34503	0.11631	11.5642	6.25719e-31	3.54589e-29
ABI3BP	385.431	-0.310703	0.178722	-1.73847	0.0821284	0.153838
ABL1	2461.62	-0.136971	0.0589197	-2.3247	0.0200879	0.0468746
ABL2	2568.77	-0.0984285	0.0663698	-1.48303	0.138066	0.234343
ABLIM1	930.943	-0.0738903	0.126974	-0.581934	0.560611	0.680998
ABLIM2	48.374	-0.341134	0.130756	-2.60894	0.0090823	0.0238568
ABLIM3	682.099	-0.203183	0.117749	-1.72555	0.0844278	0.157449
ABO	3.78763	-0.493921	0.152173	-3.24579	0.00117124	0.00396591
ABR	4787.48	-0.0529768	0.0694858	-0.762412	0.445814	0.576801
ABRA	0.696912	0.494802	0.191149	2.58857	0.00963752	0.0251144
ABT1	709.21	0.10896	0.0645287	1.68855	0.0913063	0.167883
ABTB1	540.934	0.265003	0.0777236	3.40955	0.0006507	0.00235175
ABTB2	664.857	-0.133921	0.102682	-1.30422	0.192157	0.304268
ACAA1	1034.14	0.110361	0.06155	1.79304	0.0729671	0.139568
ACAA2	895.457	-0.0562712	0.0715281	-0.7867	0.431457	0.563034
ACACA	1391.81	-0.242092	0.0605616	-3.99745	6.40293e-05	0.00029118
ACACB	469.974	-0.285477	0.106195	-2.68824	0.00718288	0.0195009
ACAD10	594.083	-0.0486912	0.0643343	-0.756846	0.449142	0.579605
ACAD11	404.571	0.0355537	0.0705533	0.503926	0.614313	0.727395
ACAD8	408.101	-0.0802673	0.0564743	-1.42131	0.155227	0.257152
ACAD9	927.645	-0.0808213	0.0519225	-1.55657	0.119572	0.208583
ACADL	4.16974	-0.809355	0.231336	-3.49861	0.000467687	0.00175195
ACADM	877.076	0.117019	0.0569189	2.05589	0.0397931	0.0841123
ACADS	539.08	0.213477	0.0892415	2.39212	0.0167513	0.0402382
ACADSB	397.583	0.215384	0.0798255	2.69818	0.006972	0.0190117
ACADVL	4368.85	-0.210875	0.0658447	-3.20262	0.00136185	0.0045393
ACAN	147.789	-1.51117	0.153545	-9.84186	7.43221e-23	2.19879e-21
ACAP1	291.211	1.61523	0.140172	11.5232	1.00761e-30	5.5727e-29
ACAP2	1118.54	0.0643013	0.046792	1.37419	0.169381	0.275662
ACAP3	924.6	-0.235736	0.0768185	-3.06874	0.00214966	0.00676772
ACAT1	928.745	0.0372531	0.0672213	0.554187	0.579451	0.697508
ACAT2	421.699	0.0735664	0.0746813	0.985071	0.324589	0.455556
ACBD3	1399.01	-0.112982	0.0409543	-2.75873	0.00580268	0.0162669
ACBD4	194.253	0.382269	0.0760211	5.02846	4.9443e-07	3.26817e-06
ACBD5	586.594	0.113425	0.0679565	1.66909	0.0951002	0.173393
ACBD6	629.93	-0.0929233	0.0496413	-1.87189	0.0612212	0.120466
ACBD7	18.8812	0.115117	0.118604	0.970601	0.331747	0.463025
ACCS	288.255	0.268701	0.0813621	3.30254	0.000958149	0.00332864
ACCSL	24.1284	-0.0988884	0.210439	-0.469915	0.638416	0.74752
ACD	457.491	-0.105112	0.062805	-1.67363	0.094204	0.171993
ACE	365.366	0.43552	0.124234	3.50565	0.000455501	0.00170962
ACE2	3.48386	-0.22522	0.173882	-1.29525	0.195235	0.30811
ACER1	6.39288	-3.37909	0.390794	-8.64672	5.30003e-18	1.0649e-16
ACER2	24.9701	-0.0245553	0.0842524	-0.291449	0.770708	0.849282
ACER3	516.576	-0.155101	0.0881279	-1.75995	0.0784156	0.148124
ACHE	59.8578	0.103213	0.138465	0.745409	0.456025	0.586109
ACIN1	3260.31	-0.0828845	0.0468947	-1.76746	0.0771511	0.146216
ACLY	4386.23	-0.150921	0.0458783	-3.2896	0.00100329	0.00346287
ACMSD	0.296146	-0.0350446	0.314093	-0.111574	0.911161	0.945362
ACO1	790.189	-0.018127	0.0714177	-0.253816	0.799638	0.868965
ACO2	4243.98	-0.0726982	0.0719586	-1.01028	0.312363	0.442805
ACOT1	412.178	-0.0941649	0.0937063	-1.00489	0.314948	0.445528
ACOT11	144.217	-0.34525	0.128922	-2.67798	0.00740684	0.0200245
ACOT12	1.85076	-0.370445	0.300279	-1.23367	0.217325	0.334796
ACOT13	498.218	0.137741	0.0700749	1.96562	0.0493422	0.10084
ACOT2	356.108	-0.0638313	0.0764857	-0.834551	0.40397	0.536826
ACOT4	52.3383	0.289353	0.111109	2.60424	0.00920784	0.0241353
ACOT6	2.02198	-0.244947	0.161765	-1.51422	0.12997	0.223238
ACOT7	3135.98	0.163837	0.084759	1.93298	0.053239	0.107278
ACOT8	450.447	0.0687478	0.0689956	0.996408	0.319052	0.449766
ACOT9	669.115	0.0442432	0.0511551	0.864882	0.387103	0.519646
ACOX1	1061.51	0.0236962	0.0557197	0.425275	0.670637	0.773659
ACOX2	63.94	-0.509505	0.148435	-3.4325	0.00059804	0.002183
ACOX3	379.477	-0.0884847	0.0574949	-1.539	0.123804	0.214571
ACOXL	5.43733	1.33971	0.163125	8.21281	2.16071e-16	3.81718e-15
ACP1	1143.09	-0.0953475	0.0474966	-2.00746	0.0447007	0.0927797
ACP2	1125.19	0.495017	0.0713064	6.94211	3.8629e-12	4.68144e-11
ACP5	4196.98	0.470241	0.110987	4.2369	2.26628e-05	0.000113589
ACP6	408.256	-0.359194	0.107534	-3.34027	0.000836973	0.00294625
ACR	4.08917	-0.0582905	0.144041	-0.404681	0.685712	0.785526
ACRBP	27.6236	0.77869	0.0978729	7.95613	1.77501e-15	2.90907e-14
ACRV1	4.94102	-0.679844	0.129243	-5.26018	1.43911e-07	1.02121e-06
ACSBG1	142.96	0.00563656	0.172183	0.0327358	0.973885	0.983664
ACSBG2	1.33957	0.220456	0.147055	1.49914	0.133838	0.228879
ACSF2	412.525	0.195226	0.11113	1.75673	0.0789643	0.148916
ACSF3	514.534	-0.100604	0.0636191	-1.58134	0.1138	0.200537
ACSL1	1536.61	-0.00353627	0.0853212	-0.0414466	0.96694	0.980323
ACSL3	4235.52	-0.00252294	0.072588	-0.034757	0.972274	0.983147
ACSL4	1210.99	0.160338	0.0655662	2.44543	0.0144678	0.0354459
ACSL5	333.687	1.20424	0.121065	9.94705	2.5976e-23	8.02414e-22
ACSL6	15.1878	1.00664	0.179279	5.61494	1.96634e-08	1.57679e-07
ACSM1	1.43274	0.353803	0.209525	1.6886	0.0912964	0.167883
ACSM2A	0.612462	-0.170114	0.32648	-0.521054	0.602329	0.717056
ACSM2B	0.41135	-0.304283	0.427359	-0.712006	0.476461	0.603507
ACSM3	22.4494	0.205344	0.141435	1.45186	0.146541	0.245721
ACSM4	0.220084	-0.0608223	0.64098	-0.0948895	0.924403	0.953492
ACSM5	23.5842	0.847299	0.154338	5.48991	4.02141e-08	3.08781e-07
ACSS1	1293.93	0.0372695	0.0868687	0.429032	0.6679	0.771491
ACSS2	1148.03	-0.0612767	0.0816671	-0.750323	0.45306	0.583278
ACSS3	128.789	-0.0916784	0.18691	-0.490495	0.623784	0.735363
ACTA1	8.16521	-1.4272	0.197798	-7.21544	5.37613e-13	7.10372e-12
ACTA2	2492.27	-0.251373	0.110909	-2.26648	0.023422	0.0534534
ACTB	113416	0.00732622	0.0686682	0.10669	0.915035	0.947793
ACTBL2	5.29826	-0.746438	0.202007	-3.6951	0.000219797	0.00088657
ACTC1	13.6615	-1.82815	0.231826	-7.88589	3.12299e-15	5.0161e-14
ACTG1	90054.9	-0.077058	0.0669523	-1.15094	0.249758	0.372082
ACTG2	225.114	-0.607658	0.163759	-3.71068	0.0002067	0.00083921
ACTL6A	982.405	-0.15973	0.0496288	-3.21849	0.00128867	0.00431632
ACTL6B	0.549632	-1.35042	0.474761	-2.84442	0.00444919	0.0128786
ACTL7A	0.162037	-0.0426189	0.369498	-0.115343	0.908173	0.944206
ACTL7B	0.342881	0.170186	0.240347	0.708086	0.478892	0.605728
ACTL8	9.38498	0.792831	0.269564	2.94116	0.00326985	0.00982909
ACTL9	0.07601	-0.0519495	0.985844	-0.0526955	0.957975	NA
ACTN1	6374.18	-0.221416	0.0841883	-2.63001	0.00853836	0.0226162
ACTN2	42.4667	-0.523333	0.184855	-2.83104	0.00463974	0.0133725
ACTN3	2.0876	0.066727	0.139773	0.477396	0.63308	0.743128
ACTN4	13912	-0.200701	0.0702464	-2.85709	0.00427543	0.0124316
ACTR10	902.213	0.0185996	0.0472785	0.393404	0.694021	0.791887
ACTR1A	2516.39	0.0107894	0.0546464	0.19744	0.843483	0.899604
ACTR1B	1033.27	0.00220396	0.0514906	0.0428031	0.965858	0.979738
ACTR2	5136.49	0.0808802	0.0425074	1.90273	0.0570756	0.113544
ACTR3	3824.01	0.161202	0.0476346	3.38414	0.000714024	0.00255993
ACTR3B	203.334	-0.496142	0.0748312	-6.63015	3.35335e-11	3.72199e-10
ACTR3C	16.8539	-0.155679	0.156556	-0.994397	0.32003	0.450657
ACTR5	248.587	0.0325685	0.0543282	0.599477	0.548855	0.670304
ACTR6	348.211	0.135737	0.0536962	2.52787	0.0114758	0.0291771
ACTR8	540.153	-0.0861908	0.0333962	-2.58086	0.00985551	0.02555
ACTRT1	0.0609751	-0.0171742	0.986241	-0.0174138	0.986106	NA
ACTRT2	0.00964827	-0.0282485	3.13166	-0.00902028	0.992803	NA
ACVR1	884.636	-0.310236	0.0577577	-5.37133	7.81574e-08	5.75156e-07
ACVR1B	593.308	-0.292067	0.076078	-3.83905	0.000123509	0.000527818
ACVR1C	68.6725	-0.313835	0.154327	-2.03357	0.0419953	0.0880307
ACVR2A	252.692	-0.289356	0.055291	-5.23332	1.66488e-07	1.1716e-06
ACVR2B	457.189	-0.0426878	0.07867	-0.542619	0.587392	0.704495
ACVRL1	443.892	-0.18896	0.118072	-1.60038	0.109513	0.194387
ACY1	1007.17	-0.108044	0.0738898	-1.46223	0.143677	0.241927
ACY3	17.1236	1.32441	0.192596	6.87659	6.13018e-12	7.29728e-11
ACYP1	165.178	0.214165	0.0744441	2.87685	0.00401663	0.0117748
ACYP2	81.7544	0.116063	0.0769834	1.50763	0.131648	0.22567
ADA	318.788	0.366306	0.0826573	4.43163	9.35244e-06	5.04249e-05
ADAD1	0.331139	-0.229039	1.14548	-0.199951	0.841519	0.89841
ADAD2	3.35639	-0.901883	0.191397	-4.71211	2.45162e-06	1.44688e-05
ADAL	211.366	0.0494359	0.0562851	0.878313	0.379774	0.511993
ADAM10	2059.15	-0.00443811	0.0618744	-0.0717277	0.942819	0.965495
ADAM11	121.405	0.0759374	0.16097	0.471748	0.637107	0.746389
ADAM12	823.931	-0.751932	0.118925	-6.32275	2.56949e-10	2.57013e-09
ADAM15	3239.51	-0.273589	0.0755155	-3.62295	0.000291266	0.00114249
ADAM17	637.08	-0.326001	0.066973	-4.86765	1.12935e-06	7.09989e-06
ADAM18	0.0536816	-0.0758024	1.04436	-0.0725828	0.942138	NA
ADAM19	836.505	-0.207978	0.136477	-1.5239	0.127533	0.219825
ADAM2	0.0304067	-0.0135712	1.84928	-0.00733864	0.994145	NA
ADAM20	1.98528	-0.0253452	0.134219	-0.188834	0.850223	0.904335
ADAM21	8.92681	-0.0589037	0.159761	-0.368698	0.712353	0.805948
ADAM21P1	2.26766	-0.0564436	0.19598	-0.288006	0.773342	0.85102
ADAM22	52.5946	-0.334924	0.131424	-2.54842	0.0108211	0.0276965
ADAM23	478.212	-0.689449	0.169507	-4.06738	4.75446e-05	0.000221728
ADAM28	88.7355	1.25232	0.144761	8.65093	5.10801e-18	1.0276e-16
ADAM29	0.807161	0.436961	0.267603	1.63287	0.102496	0.184372
ADAM30	0.266304	-0.141337	0.358726	-0.393998	0.693582	0.791548
ADAM32	6.76923	-0.608813	0.172314	-3.53317	0.000410609	0.00155637
ADAM33	45.0862	-0.736454	0.166483	-4.42359	9.70738e-06	5.2251e-05
ADAM3A	0.178668	-0.427238	0.95759	-0.44616	0.655482	0.762234
ADAM6	39783.8	1.69945	0.312828	5.43254	5.55589e-08	4.18029e-07
ADAM7	0.0370155	-0.0501907	1.28157	-0.0391636	0.96876	NA
ADAM8	317.982	0.363383	0.131284	2.76791	0.00564162	0.0158929
ADAM9	1533.66	-0.409795	0.0850657	-4.8174	1.45442e-06	8.9463e-06
ADAMDEC1	183.365	1.8354	0.173254	10.5937	3.18682e-26	1.18999e-24
ADAMTS1	1142.87	-0.825761	0.105835	-7.80231	6.07861e-15	9.56297e-14
ADAMTS10	91.2062	-0.738688	0.131848	-5.60258	2.11181e-08	1.68338e-07
ADAMTS12	81.7178	-0.998527	0.12536	-7.96529	1.64831e-15	2.70969e-14
ADAMTS13	92.8137	-0.152903	0.100795	-1.51696	0.129277	0.222261
ADAMTS14	106.672	-0.09689	0.13049	-0.742508	0.457779	0.587473
ADAMTS15	35.9572	-0.799816	0.169733	-4.7122	2.45057e-06	1.44679e-05
ADAMTS16	102.815	-0.372272	0.186193	-1.99939	0.0455663	0.0943451
ADAMTS17	114.326	-0.34274	0.130966	-2.61703	0.00886997	0.023406
ADAMTS18	6.97718	-1.15081	0.193331	-5.95252	2.64037e-09	2.35555e-08
ADAMTS19	2.08028	-1.55303	0.407448	-3.81161	0.000138065	0.000583055
ADAMTS2	405.159	-0.198747	0.135164	-1.47041	0.141449	0.238951
ADAMTS20	6.38522	-0.784971	0.267704	-2.93224	0.00336526	0.0100651
ADAMTS3	90.0149	-1.17897	0.154745	-7.6188	2.5604e-14	3.80139e-13
ADAMTS4	924.785	-0.225223	0.140289	-1.60542	0.108401	0.192774
ADAMTS5	127.489	-1.28592	0.144432	-8.90332	5.4201e-19	1.18682e-17
ADAMTS6	50.2131	-0.445969	0.136808	-3.25981	0.00111486	0.00379738
ADAMTS7	284.606	-1.04078	0.125407	-8.29921	1.04808e-16	1.89953e-15
ADAMTS8	16.0086	-0.289455	0.156636	-1.84795	0.0646096	0.126239
ADAMTS9	493.87	-1.7131	0.145501	-11.7738	5.32545e-32	3.36109e-30
ADAMTSL1	128.804	-0.646901	0.163464	-3.95745	7.57547e-05	0.000339042
ADAMTSL2	95.8938	-0.228689	0.131631	-1.73735	0.0823252	0.154107
ADAMTSL3	48.5701	-0.0193881	0.143521	-0.135089	0.892541	0.933732
ADAMTSL4	296.845	-0.500004	0.117635	-4.25046	2.13332e-05	0.000107596
ADAMTSL5	71.0622	-0.310861	0.142647	-2.17924	0.0293138	0.0648401
ADAP1	182.448	0.529155	0.114973	4.60244	4.17573e-06	2.39502e-05
ADAP2	295.016	0.605079	0.101589	5.95614	2.58271e-09	2.30795e-08
ADAR	8706.8	0.182711	0.0503118	3.63158	0.000281695	0.00110982
ADARB1	975.444	0.0872785	0.0815037	1.07085	0.284235	0.411559
ADARB2	9.17231	-0.0937206	0.205173	-0.456789	0.647823	0.755767
ADAT1	290.074	-0.171542	0.0642693	-2.66912	0.00760509	0.0204642
ADAT2	163.491	0.202799	0.0774464	2.61858	0.00882978	0.0233114
ADAT3	77.7649	-0.076933	0.0927791	-0.829206	0.406988	0.539855
ADCK1	283.182	-0.0201007	0.0689669	-0.291454	0.770704	0.849282
ADCK2	813.92	0.0727653	0.0659807	1.10283	0.270102	0.395447
ADCK5	206.405	-0.0539602	0.0807201	-0.668485	0.503824	0.629448
ADCY1	1086.18	-0.000395354	0.157777	-0.00250578	0.998001	0.998745
ADCY10	1.24881	-0.198605	0.157619	-1.26003	0.207657	0.323464
ADCY2	309.998	-0.320736	0.251537	-1.2751	0.202272	0.316516
ADCY3	1067.1	-0.227502	0.0791873	-2.87296	0.00406644	0.0119078
ADCY4	90.0986	-0.368303	0.116056	-3.1735	0.00150613	0.00495902
ADCY5	26.006	-0.287741	0.171121	-1.68151	0.0926646	0.16976
ADCY6	1360.26	-0.439107	0.0781146	-5.62132	1.89508e-08	1.52393e-07
ADCY7	503.658	0.598313	0.115305	5.18896	2.11474e-07	1.46134e-06
ADCY8	10.4715	-2.33368	0.337967	-6.90505	5.01854e-12	6.00062e-11
ADCY9	964.021	-0.0216156	0.0677832	-0.318893	0.749808	0.834592
ADCYAP1	7.75464	-1.60347	0.219375	-7.30928	2.68579e-13	3.62323e-12
ADCYAP1R1	3.4972	-1.33651	0.201806	-6.62271	3.52664e-11	3.89819e-10
ADD1	4759.04	-0.0347118	0.0422613	-0.82136	0.411441	0.544058
ADD2	57.3448	-0.980883	0.176611	-5.55393	2.79325e-08	2.19291e-07
ADD3	1384.6	0.135964	0.0714203	1.90372	0.0569468	0.113344
ADH1A	1.72909	-0.662857	0.295908	-2.24007	0.0250861	0.0567843
ADH1B	113.958	-0.661824	0.291225	-2.27255	0.0230533	0.0527242
ADH1C	3.92568	-0.391911	0.217114	-1.80509	0.07106	0.13657
ADH4	1.92527	-0.379739	0.373776	-1.01595	0.309652	0.440048
ADH5	2093.15	-0.0181752	0.0431309	-0.421397	0.673465	0.775803
ADH6	1.37427	-0.397735	0.214361	-1.85545	0.0635324	0.124436
ADH7	2.69126	-0.947375	0.408249	-2.32058	0.0203096	0.0473331
ADHFE1	112.573	0.260466	0.11041	2.35909	0.0183199	0.0433781
ADI1	1528.23	-0.11324	0.0838188	-1.35102	0.176691	0.284907
ADIG	0.193625	-0.407069	0.602554	-0.675572	0.499312	0.625121
ADIPOQ	33.957	-1.65483	0.417179	-3.96672	7.28672e-05	0.000327577
ADIPOR1	3318.8	-0.0388423	0.055627	-0.698264	0.485012	0.612026
ADIPOR2	2682.7	0.0916147	0.073664	1.24368	0.213616	0.330413
ADK	224.079	0.0036973	0.0665163	0.0555849	0.955672	0.973961
ADM	462.163	-0.146906	0.144737	-1.01498	0.310113	0.440431
ADM2	109.392	-0.180354	0.153886	-1.172	0.241197	0.362822
ADNP	2608.81	-0.176983	0.04809	-3.68025	0.000233003	0.000936069
ADNP2	594.362	-0.123533	0.0422524	-2.9237	0.00345902	0.0103074
ADO	582.282	0.0761641	0.0782758	0.973023	0.330542	0.461703
ADORA1	75.1016	-0.394165	0.139061	-2.83448	0.00459008	0.0132476
ADORA2A	137.445	2.36048	0.286302	8.24471	1.65563e-16	2.96063e-15
ADORA2B	105.819	-0.516933	0.121282	-4.26225	2.02377e-05	0.000102714
ADORA3	139.802	1.03313	0.126711	8.15348	3.53613e-16	6.1194e-15
ADPGK	1156.24	0.166732	0.0554238	3.00831	0.00262709	0.00811212
ADPRH	384.184	0.235198	0.0852972	2.75739	0.00582639	0.0163249
ADPRHL1	41.0603	0.0851918	0.160206	0.531765	0.594889	0.710354
ADRA1A	2.41384	-0.566882	0.22527	-2.51646	0.0118542	0.0300111
ADRA1B	39.3019	0.0365617	0.161128	0.226911	0.820493	0.884166
ADRA1D	6.04444	-1.20571	0.143774	-8.38616	5.02287e-17	9.31314e-16
ADRA2A	144.714	0.2007	0.161928	1.23944	0.215183	0.332134
ADRA2B	31.4424	-0.0965428	0.165554	-0.58315	0.559793	0.680255
ADRA2C	209.028	-0.291979	0.183813	-1.58846	0.112183	0.198207
ADRB1	14.3084	-0.544852	0.193468	-2.81623	0.00485909	0.0139374
ADRB2	58.6296	0.0940172	0.135139	0.695706	0.486613	0.613517
ADRB3	2.6615	0.0786079	0.192951	0.407397	0.683716	0.784412
ADRM1	2854.92	-0.0875078	0.0662204	-1.32146	0.186347	0.29729
ADSL	1713.4	-0.111776	0.0554088	-2.01729	0.043665	0.0910173
AEBP1	25570	-0.489112	0.102941	-4.75136	2.02057e-06	1.20844e-05
AEBP2	571.461	0.0305722	0.0473471	0.645704	0.518471	0.642708
AEN	1186.04	-0.131942	0.0790594	-1.6689	0.095138	0.173403
AFAP1	1159.66	-0.327717	0.0949856	-3.45017	0.000560224	0.00205897
AFAP1L1	591.704	-0.222588	0.0916975	-2.42742	0.0152066	0.0369877
AFAP1L2	938.897	-0.0575365	0.131324	-0.438127	0.661294	0.76617
AFF1	1181.92	0.157725	0.0607659	2.59562	0.00944207	0.0246809
AFF2	93.3979	-0.551328	0.174665	-3.15649	0.0015968	0.00521595
AFF3	600.5	0.322191	0.141457	2.27766	0.0227469	0.0520752
AFF4	2346.18	0.0345699	0.0556966	0.620683	0.534808	0.657165
AFG3L2	2243.18	-0.101293	0.0559815	-1.8094	0.0703884	0.135457
AFM	0.226202	-0.537047	0.803721	-0.668201	0.504005	0.629625
AFMID	336.348	-0.15606	0.0663692	-2.35139	0.0187035	0.0441693
AFP	1.04484	-0.662757	0.693618	-0.955507	0.339322	0.471284
AFTPH	756.368	0.104458	0.0402532	2.59501	0.00945877	0.0247126
AGA	597.554	-0.109822	0.0670329	-1.63833	0.101352	0.18262
AGAP1	470.55	-0.458752	0.0671494	-6.83181	8.38496e-12	9.87903e-11
AGAP11	24.8897	-0.841613	0.167305	-5.03042	4.89414e-07	3.23875e-06
AGAP2	166.832	0.625967	0.115256	5.43111	5.60044e-08	4.20987e-07
AGAP3	3437.3	-0.197618	0.0790907	-2.49862	0.0124677	0.0313279
AGAP4	155.723	0.0556141	0.101281	0.549108	0.582932	0.70065
AGAP5	29.6662	0.188499	0.105689	1.78353	0.0744998	0.142078
AGAP6	134.465	0.0075448	0.0910531	0.0828615	0.933962	0.96027
AGBL1	0.968192	0.342524	0.192196	1.78216	0.0747238	0.142455
AGBL2	13.9989	0.28061	0.0972619	2.8851	0.00391289	0.0115147
AGBL3	8.26772	-0.0643488	0.0919711	-0.699663	0.484138	0.611115
AGBL4	4.10166	0.128165	0.170137	0.753308	0.451265	0.581605
AGBL5	727.248	-0.214544	0.0563775	-3.80549	0.000141521	0.000596084
AGER	72.7334	0.0511661	0.104179	0.491137	0.62333	0.734935
AGFG1	1500.57	-0.0587076	0.0398177	-1.47441	0.140372	0.237505
AGFG2	448.248	0.0886248	0.0669386	1.32397	0.185512	0.296135
AGGF1	751.343	0.023322	0.0412267	0.565701	0.571597	0.690741
AGK	797.268	-0.0826788	0.0649977	-1.27203	0.203364	0.317669
AGL	506.13	0.0440432	0.0637451	0.690927	0.489612	0.616188
AGMAT	39.9832	0.139733	0.124295	1.1242	0.260928	0.38484
AGPAT1	3773.04	-0.0424572	0.0725205	-0.585451	0.558244	0.678886
AGPAT2	1594.28	0.163275	0.10447	1.56288	0.11808	0.206608
AGPAT3	2080.52	0.165683	0.0641062	2.58451	0.00975179	0.0253547
AGPAT4	128.63	-0.500708	0.115315	-4.34209	1.41136e-05	7.37719e-05
AGPAT5	714.179	-0.143131	0.0706759	-2.02517	0.0428503	0.0895394
AGPS	1295.01	-0.0580925	0.0492171	-1.18033	0.237869	0.359495
AGR2	4.01707	-1.10072	0.340628	-3.23145	0.00123166	0.00414779
AGR3	0.796973	-2.09776	0.850941	-2.46523	0.0136926	0.0338404
AGRN	6411.4	-0.415608	0.0816626	-5.08934	3.5932e-07	2.42469e-06
AGRP	1.43267	0.62961	0.191316	3.29094	0.000998548	0.00344937
AGT	349.675	-0.536709	0.211161	-2.54171	0.0110313	0.0281626
AGTPBP1	386.374	0.115341	0.0555219	2.07739	0.0377657	0.0804077
AGTR1	14.7686	-0.996192	0.164575	-6.05313	1.4206e-09	1.30126e-08
AGTR2	0.420099	-1.04794	0.61705	-1.6983	0.0894509	0.164962
AGTRAP	1075.76	0.243972	0.0766302	3.18375	0.0014538	0.00480244
AGXT	2.76397	-0.938465	0.316963	-2.9608	0.0030684	0.00929472
AGXT2	0.338003	-0.371834	0.454238	-0.81859	0.413021	0.545475
AHCTF1	1417.5	-0.137246	0.0543068	-2.52724	0.0114963	0.0292156
AHCY	5166.21	-0.172723	0.0762057	-2.26654	0.0234184	0.0534529
AHCYL1	2380.59	-0.0389361	0.0512226	-0.760135	0.447174	0.578104
AHCYL2	1748.29	0.135252	0.102395	1.32089	0.186539	0.297537
AHDC1	714.675	-0.302187	0.0691456	-4.3703	1.24077e-05	6.53648e-05
AHI1	317.017	0.00452766	0.075877	0.0596711	0.952418	0.972232
AHNAK	17641.5	-0.380358	0.117009	-3.25068	0.00115131	0.00390819
AHNAK2	2983.6	-0.623076	0.173844	-3.58411	0.000338234	0.00130836
AHR	2477.98	-0.249287	0.090859	-2.74366	0.00607576	0.0169234
AHRR	142.014	0.00515606	0.153318	0.0336298	0.973172	0.9835
AHSA1	2204.25	-0.0309952	0.0513122	-0.60405	0.54581	0.667599
AHSG	1.98851	0.134013	0.330865	0.405037	0.68545	0.785367
AHSP	0.52895	0.382309	0.268286	1.42501	0.154155	0.255887
AICDA	7.29566	1.72217	0.24777	6.95066	3.63592e-12	4.41633e-11
AIDA	1048.97	0.0922026	0.0516934	1.78365	0.0744813	0.14206
AIF1	489.722	1.23589	0.108769	11.3625	6.42631e-30	3.34709e-28
AIF1L	2120.52	0.10418	0.133339	0.781312	0.434619	0.565873
AIFM1	1199.37	-0.0153753	0.0476856	-0.322431	0.747126	0.832531
AIFM2	538.953	0.075143	0.0813171	0.924073	0.355448	0.487024
AIFM3	31.0171	0.379884	0.110312	3.44374	0.00057373	0.00210573
AIG1	257.893	-0.0570544	0.0798807	-0.714245	0.475076	0.602458
AIM2	225.765	0.671929	0.185968	3.61314	0.000302517	0.00118299
AIMP1	839.003	-0.0276975	0.0431725	-0.641554	0.521163	0.645497
AIMP2	624.109	-0.34633	0.0691504	-5.00836	5.48964e-07	3.61351e-06
AIP	1427.28	0.143578	0.0709557	2.02348	0.0430235	0.089843
AIPL1	0.365514	1.0809	0.289396	3.73502	0.0001877	0.000768078
AIRE	1.47925	0.371054	0.25306	1.46627	0.142575	0.240423
AJAP1	18.454	-1.64805	0.183724	-8.97023	2.95897e-19	6.64179e-18
AK1	735.029	-0.15934	0.0800312	-1.99098	0.0464834	0.0959231
AK2	3648.27	0.0535646	0.0502852	1.06522	0.286778	0.414309
AK3	854.477	0.0395722	0.0623602	0.634574	0.525706	0.649274
AK5	89.0855	-0.209094	0.181701	-1.15076	0.249832	0.372124
AK7	10.7466	-0.215071	0.135432	-1.58804	0.112278	0.198332
AKAP1	905.637	-0.144734	0.0449049	-3.22311	0.00126805	0.00425522
AKAP10	340.284	0.0104125	0.0488982	0.212943	0.831371	0.891233
AKAP11	1065.84	-0.0404516	0.064344	-0.628677	0.52956	0.652334
AKAP12	3369.21	0.00184193	0.129012	0.0142772	0.988609	0.992617
AKAP13	2585.7	0.162279	0.0729341	2.225	0.0260809	0.0587058
AKAP14	0.319585	0.423791	0.374719	1.13096	0.258073	0.381679
AKAP3	24.3316	0.0789819	0.121736	0.648797	0.516469	0.640917
AKAP4	0.083083	-0.136189	0.711427	-0.191431	0.848188	NA
AKAP5	72.9152	1.6661	0.0969748	17.1807	3.70351e-66	9.93406e-63
AKAP6	1319.95	-0.150655	0.181322	-0.830869	0.406047	0.538919
AKAP7	131.697	0.420014	0.0675512	6.21771	5.04447e-10	4.85561e-09
AKAP8	674.208	-0.0454605	0.0346336	-1.31261	0.189314	0.300771
AKAP8L	997.713	-0.0183106	0.0606662	-0.301825	0.762785	0.844133
AKAP9	1831.02	0.0342641	0.0918944	0.372864	0.70925	0.803454
AKIRIN1	1094.51	-0.0188342	0.0541797	-0.347624	0.728122	0.818913
AKIRIN2	563.605	0.302282	0.0641324	4.7134	2.43611e-06	1.43931e-05
AKNA	1003.77	1.18942	0.102487	11.6056	3.86083e-31	2.2271e-29
AKNAD1	2.9682	-0.317361	0.135601	-2.3404	0.019263	0.0452167
AKR1A1	1878.64	0.232032	0.0628094	3.69422	0.00022056	0.000889424
AKR1B1	2143.6	0.272244	0.083009	3.27969	0.00103922	0.00357225
AKR1B10	38.3886	-3.54064	0.332603	-10.6452	1.83543e-26	7.0838e-25
AKR1B15	3.05613	-3.14583	0.390961	-8.0464	8.52646e-16	1.43241e-14
AKR1C1	77.6401	-1.20964	0.156256	-7.74139	9.83364e-15	1.51448e-13
AKR1C2	51.7803	-1.29824	0.195816	-6.6299	3.35918e-11	3.72589e-10
AKR1C3	78.8358	-0.91653	0.148327	-6.17913	6.44564e-10	6.10572e-09
AKR1C4	0.279718	0.155404	0.58499	0.265652	0.790507	0.862847
AKR1D1	0.729728	-0.306845	0.288705	-1.06283	0.287859	0.415535
AKR1E2	42.4802	-0.312747	0.124918	-2.50361	0.0122933	0.0309912
AKR7A2	1204.4	-0.108767	0.0611071	-1.77994	0.0750853	0.143026
AKR7A3	20.06	-0.38382	0.128631	-2.9839	0.00284603	0.00870136
AKT1	4692.98	-0.139322	0.0612741	-2.27375	0.0229808	0.0525806
AKT1S1	1253.15	-0.380678	0.0900869	-4.22568	2.38225e-05	0.00011881
AKT2	3020.56	-0.180054	0.0530108	-3.39655	0.000682417	0.00245701
AKT3	2006.54	-0.0156079	0.0726587	-0.214811	0.829915	0.890528
AKTIP	271.877	0.0426244	0.0549197	0.776122	0.437677	0.568888
ALAD	970.732	0.0824619	0.0505642	1.63084	0.102925	0.184977
ALAS1	1456.91	0.1562	0.0573868	2.72189	0.00649103	0.0179127
ALAS2	1.55902	-0.173043	0.23621	-0.732582	0.463813	0.59243
ALB	29.5183	-1.02333	0.37598	-2.72175	0.00649365	0.0179168
ALCAM	616.983	-0.383157	0.110088	-3.48045	0.000500565	0.00186354
ALDH16A1	853.117	0.114025	0.0745215	1.5301	0.125993	0.217638
ALDH18A1	1999.13	-0.194084	0.0462811	-4.19359	2.7457e-05	0.000135094
ALDH1A1	1625.37	0.191484	0.151744	1.26189	0.206988	0.322531
ALDH1A2	52.766	-0.30467	0.162012	-1.88055	0.0600335	0.118462
ALDH1A3	4250.79	-0.167266	0.190349	-0.878733	0.379546	0.51185
ALDH1B1	836.69	0.117422	0.115827	1.01378	0.310689	0.440899
ALDH1L1	55.3649	0.25156	0.225034	1.11787	0.263621	0.387746
ALDH1L2	380.733	-0.0779437	0.135224	-0.576404	0.564342	0.684285
ALDH2	882.592	0.444114	0.139318	3.18778	0.00143368	0.00474667
ALDH3A1	43.605	-1.9791	0.222176	-8.90781	5.20482e-19	1.14435e-17
ALDH3A2	1127.36	0.012273	0.0689528	0.177992	0.85873	0.910255
ALDH3B1	606.041	0.314359	0.115546	2.72065	0.00651542	0.0179676
ALDH3B2	484.333	-2.01441	0.272515	-7.39191	1.44737e-13	1.99094e-12
ALDH4A1	842.506	-0.200951	0.100692	-1.9957	0.0459661	0.095014
ALDH5A1	380.529	0.0343195	0.117265	0.292667	0.769777	0.848664
ALDH6A1	299.018	-0.0424562	0.0790949	-0.536776	0.591422	0.707552
ALDH7A1	1240.87	-0.148881	0.075695	-1.96685	0.0492002	0.100626
ALDH8A1	9.39434	0.410221	0.13759	2.98147	0.00286866	0.0087589
ALDH9A1	2079.78	0.0858856	0.0535983	1.6024	0.109068	0.193789
ALDOA	33267.9	-0.0601257	0.0779081	-0.771751	0.440262	0.571463
ALDOB	7.16316	-1.42589	0.199011	-7.16488	7.78541e-13	1.01621e-11
ALDOC	480.391	-0.157318	0.116541	-1.34989	0.177051	0.285316
ALG1	847.022	-0.181161	0.0570096	-3.17773	0.00148432	0.00489622
ALG10	96.8638	-0.0699184	0.0772172	-0.905477	0.365213	0.497102
ALG10B	249.783	-0.050406	0.0707706	-0.712245	0.476313	0.603415
ALG11	44.0856	-0.171608	0.0754864	-2.27337	0.0230041	0.0526266
ALG12	664.352	-0.05816	0.0648236	-0.897205	0.36961	0.501729
ALG13	461.799	0.100539	0.0491999	2.04349	0.0410041	0.0863318
ALG14	204.391	-0.0236924	0.0626191	-0.378358	0.705165	0.800427
ALG1L	11.4889	-0.452279	0.154741	-2.92281	0.00346886	0.0103327
ALG2	634.772	-0.0178043	0.0426592	-0.417362	0.676413	0.778475
ALG3	1519.35	-0.187979	0.0733688	-2.56211	0.0104038	0.026786
ALG5	596.972	-0.00958389	0.0497823	-0.192516	0.847338	0.902432
ALG6	430.098	-0.0783784	0.0564594	-1.38823	0.165068	0.269761
ALG8	1383.3	-0.486392	0.0989254	-4.91675	8.79916e-07	5.62629e-06
ALG9	511.643	-0.143898	0.0580967	-2.47687	0.0132539	0.0329646
ALK	163.82	-0.0795541	0.136901	-0.581107	0.561168	0.681412
ALKBH1	211.644	0.0735341	0.0400169	1.83758	0.0661247	0.128688
ALKBH2	335.695	-0.14502	0.0722017	-2.00854	0.0445861	0.0925894
ALKBH3	377.36	-0.0167138	0.050179	-0.333083	0.739072	0.826187
ALKBH4	310.268	-0.224765	0.0765902	-2.93464	0.00333934	0.0100006
ALKBH5	2080.49	-0.0213504	0.0553492	-0.38574	0.69969	0.796223
ALKBH6	163.897	0.0740898	0.0643436	1.15147	0.249539	0.371859
ALKBH7	724.691	0.0951248	0.0888295	1.07087	0.284228	0.411559
ALKBH8	172.409	-0.135305	0.0589777	-2.29418	0.0217803	0.0501406
ALLC	1.22811	-0.762026	0.254014	-2.99993	0.00270038	0.00829885
ALMS1	530.768	-0.045799	0.0850561	-0.538456	0.590262	0.706821
ALOX12	10.1938	-0.86706	0.132925	-6.52294	6.89403e-11	7.38207e-10
ALOX12B	38.7916	-3.91147	0.305345	-12.81	1.44119e-37	1.45877e-35
ALOX15	13.6096	-0.968332	0.232458	-4.16561	3.10516e-05	0.000151117
ALOX15B	61.7797	0.755712	0.174392	4.33341	1.46816e-05	7.64186e-05
ALOX5	260.92	0.957338	0.123973	7.72212	1.1441e-14	1.7503e-13
ALOX5AP	205.373	0.646207	0.126803	5.09613	3.46666e-07	2.34521e-06
ALOXE3	19.5238	-4.19612	0.27404	-15.3121	6.35257e-53	2.3236e-50
ALPI	0.109625	-0.136148	0.650674	-0.209241	0.83426	NA
ALPK1	386.423	0.43355	0.0671223	6.4591	1.05326e-10	1.10792e-09
ALPK2	48.1388	0.243313	0.169677	1.43398	0.151579	0.252511
ALPK3	95.8971	-0.560781	0.111857	-5.01338	5.34833e-07	3.52337e-06
ALPL	264.996	0.0891878	0.1326	0.672608	0.501197	0.626992
ALPP	0.423242	0.200006	0.371497	0.538379	0.590315	0.706828
ALS2	757.817	-0.152442	0.0459479	-3.31772	0.00090757	0.0031698
ALS2CL	126.697	-0.83918	0.152547	-5.50113	3.77369e-08	2.90732e-07
ALX1	337.757	-0.427447	0.145907	-2.92958	0.00339421	0.0101423
ALX3	16.5208	-1.19854	0.229731	-5.21712	1.81724e-07	1.27104e-06
ALX4	4.02918	-0.641011	0.231008	-2.77484	0.00552283	0.0156047
AMACR	416.574	0.164297	0.0842912	1.94916	0.0512767	0.104119
AMBN	1.6629	-0.727476	0.341608	-2.12956	0.0332078	0.0721738
AMBP	3.67396	-0.093107	0.263577	-0.353244	0.723906	0.815236
AMBRA1	1275.55	0.038135	0.0683906	0.557606	0.577114	0.695631
AMD1	2082.48	0.0700236	0.0748865	0.935063	0.349756	0.481602
AMDHD1	22.9227	0.0147119	0.171458	0.0858049	0.931622	0.958849
AMDHD2	744.549	0.113584	0.0858092	1.32368	0.185609	0.29626
AMELX	0.24698	-0.59011	0.519622	-1.13565	0.256101	0.37939
AMELY	0.0545491	-0.00436819	1.18392	-0.00368959	0.997056	NA
AMFR	2293.32	-0.21843	0.0491142	-4.44738	8.69234e-06	4.71343e-05
AMH	18.8758	-0.101705	0.182043	-0.558686	0.576376	0.695002
AMHR2	5.58502	-0.465502	0.291199	-1.59857	0.109916	0.194832
AMIGO1	67.4193	-0.117609	0.102862	-1.14337	0.252886	0.375596
AMIGO2	137.861	0.25257	0.1433	1.76252	0.0779809	0.147528
AMIGO3	105.424	-0.109579	0.0940013	-1.16572	0.243726	0.365567
AMMECR1	302.441	-0.365601	0.073885	-4.94824	7.48888e-07	4.83846e-06
AMMECR1L	1048.31	-0.190876	0.0524614	-3.63841	0.000274328	0.00108291
AMN	5.49135	-0.0914888	0.183624	-0.498241	0.618314	0.730984
AMN1	178.943	0.0022981	0.0797777	0.0288063	0.977019	0.985902
AMOT	732.445	-0.048013	0.117322	-0.40924	0.682364	0.783418
AMOTL1	2139.49	-0.485313	0.087849	-5.5244	3.30612e-08	2.5618e-07
AMOTL2	1078.65	-0.0787992	0.0852724	-0.924088	0.355441	0.487024
AMPD1	6.5863	1.41373	0.229819	6.15146	7.67707e-10	7.22542e-09
AMPD2	1312.65	-0.285363	0.0604942	-4.7172	2.39115e-06	1.4143e-05
AMPD3	187	0.484477	0.110321	4.39151	1.12566e-05	5.99086e-05
AMPH	78.792	-0.0249667	0.177351	-0.140776	0.888047	0.930969
AMT	102.727	0.00330654	0.100853	0.0327859	0.973845	0.983664
AMTN	0.669559	-1.38436	0.52612	-2.63126	0.00850699	0.022548
AMY1A	52.0662	-5.63777	0.380936	-14.7998	1.4696e-49	4.00878e-47
AMY2A	7.15473	-0.304401	0.280186	-1.08643	0.27729	0.403828
AMY2B	147.891	0.335823	0.106696	3.14748	0.00164686	0.00536095
AMZ1	12.2881	-0.278859	0.143337	-1.94547	0.0517179	0.104843
AMZ2	1334.51	0.109392	0.0569946	1.91934	0.054941	0.11006
AMZ2P1	224.965	0.0928381	0.0847425	1.09553	0.273284	0.399149
ANAPC1	822.66	-0.247813	0.0599151	-4.13607	3.53299e-05	0.000169883
ANAPC10	106.489	0.0287227	0.0402659	0.713324	0.475645	0.602988
ANAPC11	1251.35	0.105662	0.0796515	1.32656	0.184655	0.295118
ANAPC13	828.004	-0.0979097	0.0606276	-1.61494	0.106324	0.189804
ANAPC16	994.133	0.406443	0.0629238	6.45929	1.05195e-10	1.10726e-09
ANAPC2	738.338	0.0106964	0.0718637	0.148842	0.881678	0.926888
ANAPC4	428.867	0.0771973	0.054483	1.41691	0.15651	0.258821
ANAPC5	2947.06	-0.0234488	0.0546034	-0.429438	0.667604	0.771315
ANAPC7	1066.21	-0.0095267	0.0441643	-0.215711	0.829213	0.890106
ANG	143.795	-0.059258	0.108126	-0.548045	0.583661	0.701264
ANGEL1	638.939	-0.076324	0.0593534	-1.28592	0.19847	0.311931
ANGEL2	559.016	-0.0118954	0.0399695	-0.297611	0.766	0.846106
ANGPT1	290.283	-1.03033	0.174919	-5.89029	3.85514e-09	3.37383e-08
ANGPT2	387.034	-0.738264	0.139623	-5.28756	1.2396e-07	8.87064e-07
ANGPT4	0.892371	-0.0308196	0.202283	-0.152359	0.878904	0.924878
ANGPTL1	43.5653	-0.734872	0.149786	-4.90613	9.28889e-07	5.90891e-06
ANGPTL2	1083.18	-0.737119	0.132466	-5.5646	2.62749e-08	2.06781e-07
ANGPTL3	1.45717	-0.0949498	0.209218	-0.453831	0.64995	0.757334
ANGPTL4	672.041	-0.941177	0.165904	-5.67303	1.40292e-08	1.14845e-07
ANGPTL5	1.49191	-0.866022	0.262271	-3.30202	0.000959916	0.00333365
ANGPTL6	19.437	0.391974	0.115978	3.37973	0.00072557	0.00259785
ANGPTL7	473.343	-0.628153	0.254147	-2.47162	0.0134504	0.0333339
ANK1	30.508	0.0110184	0.135552	0.0812856	0.935215	0.960827
ANK2	1591.5	-0.11256	0.11604	-0.970009	0.332042	0.463396
ANK3	107.633	-1.43212	0.177275	-8.0785	6.55681e-16	1.10962e-14
ANKAR	23.9823	-0.153619	0.0912778	-1.68298	0.0923784	0.169332
ANKDD1A	185.115	0.221824	0.0802616	2.76376	0.00571387	0.0160655
ANKFN1	5.25666	-0.341225	0.243849	-1.39933	0.161715	0.26542
ANKFY1	1980.79	0.0272717	0.0468199	0.582482	0.560242	0.68075
ANKH	1770.63	-0.789805	0.121631	-6.49346	8.38862e-11	8.89957e-10
ANKHD1	1523.9	0.165785	0.0482448	3.43633	0.000589648	0.00215579
ANKIB1	1174.57	-0.0627302	0.0494697	-1.26805	0.204779	0.319538
ANKK1	5.17561	-0.380644	0.171532	-2.21909	0.0264804	0.0595218
ANKLE1	50.808	-0.328477	0.13534	-2.42705	0.015222	0.0370176
ANKLE2	1424.32	-0.116205	0.040378	-2.87793	0.00400297	0.0117476
ANKMY1	158.275	-0.0858833	0.068179	-1.25967	0.207788	0.323605
ANKMY2	409.513	-0.127512	0.0537493	-2.37234	0.0176757	0.0420819
ANKRA2	190.806	0.107744	0.0568482	1.8953	0.0580526	0.115189
ANKRD1	5.94809	-0.664425	0.205481	-3.23352	0.00122277	0.00412303
ANKRD10	1430.83	0.0890899	0.0731934	1.21719	0.223534	0.34207
ANKRD11	2957.96	-0.307191	0.0756783	-4.05917	4.92471e-05	0.000229269
ANKRD12	771.897	0.223961	0.0772431	2.89943	0.00373847	0.011052
ANKRD13A	1166.25	0.193565	0.0485048	3.99063	6.58967e-05	0.00029866
ANKRD13B	252.798	-0.539177	0.101058	-5.33531	9.53793e-08	6.9208e-07
ANKRD13C	519.321	-0.0023896	0.0476316	-0.0501684	0.959988	0.9768
ANKRD13D	788.001	0.0839277	0.0716186	1.17187	0.241249	0.362866
ANKRD16	127.926	-0.0910182	0.0563102	-1.61637	0.106014	0.189406
ANKRD17	2623.32	-0.193572	0.0582746	-3.32173	0.000894626	0.00312934
ANKRD2	2.76316	0.205829	0.199216	1.03319	0.301513	0.431261
ANKRD22	145.335	1.66081	0.168887	9.83387	8.04674e-23	2.36753e-21
ANKRD23	63.7355	-0.083092	0.100963	-0.822996	0.41051	0.543168
ANKRD24	20.4502	0.298333	0.106604	2.7985	0.00513398	0.0146319
ANKRD26	191.42	0.0434904	0.0896861	0.484918	0.627734	0.738992
ANKRD27	859.986	0.0480381	0.051417	0.934284	0.350157	0.481949
ANKRD28	2450.12	-0.0496615	0.0749041	-0.663001	0.50733	0.632698
ANKRD29	39.2812	0.101625	0.137617	0.738461	0.460235	0.589496
ANKRD30A	0.271038	-0.630367	0.763883	-0.825214	0.40925	0.542096
ANKRD30B	62.2681	0.350595	0.23589	1.48626	0.137209	0.233279
ANKRD31	2.77811	-0.220349	0.147575	-1.49313	0.135402	0.230941
ANKRD33	0.628958	-0.543022	0.271119	-2.0029	0.0451885	0.0936592
ANKRD34A	68.9513	-0.335073	0.0913616	-3.66754	0.000244892	0.000978715
ANKRD34B	8.01584	1.22121	0.20583	5.93313	2.97213e-09	2.63546e-08
ANKRD34C	1.00107	-0.193737	0.242819	-0.797865	0.424949	0.556939
ANKRD35	43.9953	-1.38399	0.183989	-7.52214	5.38854e-14	7.7709e-13
ANKRD36	182.319	-0.12137	0.13072	-0.928472	0.353163	0.484676
ANKRD36BP1	174.05	-0.427357	0.168895	-2.53032	0.0113959	0.0289969
ANKRD37	192.434	-0.416462	0.114942	-3.62323	0.000290943	0.00114178
ANKRD39	357.712	0.0267102	0.0773175	0.345461	0.729748	0.819988
ANKRD40	1420.13	-0.0444666	0.0390863	-1.13765	0.255266	0.37844
ANKRD42	187.254	-0.0676615	0.0537782	-1.25816	0.208334	0.324205
ANKRD44	348.386	0.191868	0.0785445	2.44279	0.014574	0.0356791
ANKRD45	31.2723	-0.486885	0.206496	-2.35785	0.0183813	0.0435041
ANKRD46	279.974	-0.090333	0.0605438	-1.49203	0.135692	0.231338
ANKRD49	180.11	0.224473	0.0796804	2.81716	0.00484502	0.0139019
ANKRD50	1253.06	-0.295054	0.0707578	-4.16991	3.04713e-05	0.000148604
ANKRD52	2035.21	-0.17494	0.060858	-2.87456	0.00404596	0.0118565
ANKRD53	35.2658	-0.117103	0.124773	-0.938533	0.347971	0.479865
ANKRD54	909.054	-0.180419	0.0894451	-2.0171	0.0436854	0.0910479
ANKRD55	7.09653	0.885595	0.132619	6.67776	2.42625e-11	2.72872e-10
ANKRD6	235.831	-0.0117462	0.0869972	-0.135018	0.892597	0.933732
ANKRD7	11.8775	-0.248272	0.154829	-1.60352	0.108819	0.193411
ANKRD9	207.053	-0.118953	0.1259	-0.944825	0.344748	0.476501
ANKS1A	4148.11	-0.309911	0.10697	-2.89719	0.0037652	0.0111208
ANKS1B	78.9844	0.0580862	0.162252	0.358	0.720343	0.812532
ANKS3	260.943	-0.16085	0.0626123	-2.56898	0.0101999	0.0263368
ANKS4B	0.63688	-0.494683	0.280854	-1.76135	0.0781793	0.147789
ANKS6	454.502	-0.358798	0.073929	-4.85329	1.21432e-06	7.60736e-06
ANKZF1	576.562	0.0443019	0.0517853	0.855492	0.392279	0.525193
ANLN	1129.14	-0.347007	0.0931278	-3.72614	0.000194433	0.000792607
ANO1	402.119	-1.03039	0.127278	-8.09559	5.69872e-16	9.68481e-15
ANO10	726.63	0.051709	0.0627314	0.824291	0.409774	0.542446
ANO2	17.2527	-0.162039	0.146788	-1.10389	0.269639	0.394974
ANO3	46.1469	-1.33028	0.263899	-5.04086	4.63444e-07	3.07701e-06
ANO4	250.066	-0.298185	0.222574	-1.33971	0.180339	0.289774
ANO5	73.9708	0.108467	0.19022	0.57022	0.568529	0.688001
ANO6	1527.11	-0.140897	0.0593051	-2.3758	0.0175112	0.0417456
ANO7	34.6668	-0.387725	0.104748	-3.7015	0.000214328	0.000866463
ANO8	234.14	-0.178545	0.0849141	-2.10265	0.035496	0.0762612
ANO9	86.9832	0.668798	0.171746	3.89411	9.856e-05	0.000430571
ANP32A	3002.93	0.0114988	0.0443323	0.259377	0.795344	0.865878
ANP32B	2926.16	-0.0148033	0.0552912	-0.267733	0.788905	0.861723
ANP32D	0.617733	-0.470666	0.226372	-2.07917	0.0376018	0.0800847
ANP32E	1565.07	-0.000664167	0.054219	-0.0122497	0.990226	0.99356
ANPEP	647.277	-0.828797	0.140839	-5.88471	3.98744e-09	3.48393e-08
ANTXR1	1646.61	-0.606434	0.0945655	-6.41285	1.42821e-10	1.47438e-09
ANTXR2	558.702	-0.445955	0.115649	-3.85611	0.000115207	0.000495495
ANTXRL	0.757311	-0.427057	0.236627	-1.80477	0.0711105	0.13664
ANXA1	5325.78	-0.246673	0.128126	-1.92524	0.0541991	0.108899
ANXA10	0.269968	0.0821286	0.357414	0.229785	0.818258	0.882289
ANXA11	2848.64	0.189748	0.0658666	2.88079	0.00396679	0.0116584
ANXA13	10.7917	-0.359018	0.173733	-2.06649	0.038782	0.0823536
ANXA2	13401.7	-0.11606	0.0800931	-1.44906	0.14732	0.246831
ANXA3	172.862	0.134892	0.18408	0.732788	0.463688	0.592316
ANXA4	1369.28	0.032895	0.0610161	0.53912	0.589804	0.706588
ANXA5	19140.7	-0.0160065	0.0710012	-0.225441	0.821637	0.884997
ANXA6	3814.34	0.233665	0.097881	2.38723	0.0169757	0.0406922
ANXA7	1379.58	0.155457	0.0469001	3.31465	0.000917575	0.00319988
ANXA8	69.29	-3.75471	0.334077	-11.2391	2.62157e-29	1.28242e-27
ANXA9	56.7341	-0.968348	0.154775	-6.25649	3.93727e-10	3.84505e-09
AOAH	213.204	1.43141	0.141537	10.1133	4.82303e-24	1.54934e-22
AOC2	22.6062	-0.00209607	0.0902741	-0.023219	0.981476	0.988354
AOC3	334.458	-0.395347	0.130545	-3.02843	0.00245828	0.00764365
AOX1	96.5474	-0.162465	0.176552	-0.920211	0.357463	0.488993
AOX2P	0.0471704	-0.13443	1.22814	-0.109458	0.912839	NA
AP1AR	391.942	0.0384703	0.0780503	0.492891	0.622089	0.734131
AP1B1	3305.73	0.106348	0.0627714	1.69422	0.0902239	0.166178
AP1G1	1795.6	-0.0851628	0.0365912	-2.32741	0.0199433	0.0465846
AP1G2	771.201	0.207522	0.0815755	2.54393	0.0109613	0.0279973
AP1M1	1952.3	0.0890697	0.0565234	1.5758	0.115071	0.202245
AP1M2	24.4845	-3.09341	0.286929	-10.7811	4.22757e-27	1.7225e-25
AP1S1	1502.92	-0.316831	0.071678	-4.42019	9.86125e-06	5.30438e-05
AP1S2	4285.52	0.0915978	0.0923932	0.991391	0.321494	0.452245
AP1S3	144.078	0.2302	0.113184	2.03386	0.041966	0.0880116
AP2A1	2684.48	-0.129741	0.0572046	-2.26801	0.0233287	0.0532783
AP2A2	1615.42	-0.0106715	0.047505	-0.224639	0.82226	0.885365
AP2B1	5220.75	0.0581118	0.0467118	1.24405	0.213482	0.330268
AP2M1	7581.26	-0.111185	0.0506458	-2.19533	0.0281397	0.0625722
AP2S1	2116.77	-0.229146	0.0717689	-3.19283	0.00140886	0.00467701
AP3B1	1277.41	0.0175841	0.0423939	0.414778	0.678304	0.779982
AP3B2	51.5061	0.0579241	0.163221	0.354882	0.722678	0.814366
AP3D1	5121.63	-0.123212	0.053134	-2.3189	0.0204007	0.0475234
AP3M1	1055.99	0.0553314	0.0375072	1.47522	0.140153	0.237185
AP3M2	1130.33	0.0200348	0.0802681	0.249599	0.802898	0.871166
AP3S1	874.026	0.17953	0.0610747	2.93952	0.00328717	0.00987379
AP3S2	1124.92	0.0257812	0.0587658	0.43871	0.660871	0.766011
AP4B1	372.644	0.0394913	0.0498047	0.792923	0.427823	0.559787
AP4E1	308.079	-0.049153	0.0529303	-0.928636	0.353078	0.484642
AP4M1	410.669	-0.239564	0.0588167	-4.07306	4.63988e-05	0.000216761
AP4S1	62.6091	0.187892	0.0712127	2.63847	0.00832823	0.0221435
APAF1	396.999	-0.0127792	0.0567484	-0.22519	0.821832	0.885075
APBA1	89.4226	-0.096382	0.0955769	-1.00842	0.313251	0.443845
APBA2	463.075	-0.370253	0.155283	-2.38438	0.0171079	0.0409299
APBA3	323.484	0.181263	0.0590468	3.06981	0.00214193	0.00674603
APBB1	846.73	-0.0490725	0.0767689	-0.639224	0.522678	0.646528
APBB1IP	344.784	1.33125	0.129193	10.3043	6.73616e-25	2.30174e-23
APBB2	635.901	-0.275385	0.0766155	-3.59439	0.000325159	0.00126251
APBB3	286.817	0.18803	0.0707614	2.65724	0.00787826	0.0211005
APC	832.32	-0.0784063	0.077529	-1.01132	0.311865	0.442295
APC2	69.3232	-0.676796	0.157243	-4.30413	1.67645e-05	8.64215e-05
APCDD1	1091.18	-1.20522	0.206129	-5.84691	5.00784e-09	4.32383e-08
APCDD1L	43.2809	-1.51665	0.180533	-8.40096	4.42851e-17	8.24913e-16
APCS	0.527095	0.686545	0.761961	0.901024	0.367575	0.499642
APEH	2643.78	-0.0739781	0.0621807	-1.18973	0.234154	0.355181
APEX1	3111.44	-0.0714698	0.0457604	-1.56182	0.118329	0.206954
APEX2	692.653	0.0693291	0.0606267	1.14354	0.252814	0.375523
APH1A	4276.47	-0.109518	0.0599469	-1.82691	0.0677127	0.131234
APH1B	444.705	-0.0214786	0.0830458	-0.258636	0.795916	0.866297
API5	1696.23	0.0626727	0.0455824	1.37493	0.169153	0.27543
APIP	276.4	0.198694	0.0516508	3.84687	0.000119638	0.000512548
APLF	69.2264	-0.0851208	0.0578531	-1.47133	0.141203	0.23861
APLN	109.582	-0.96804	0.139177	-6.95544	3.5147e-12	4.28203e-11
APLNR	470.708	-0.912577	0.143499	-6.35948	2.02444e-10	2.0556e-09
APLP1	165.914	-0.671404	0.179599	-3.73835	0.00018523	0.000759709
APLP2	7709.46	-0.367782	0.0754381	-4.87529	1.08651e-06	6.85736e-06
APOA1	7.94629	-0.672895	0.211619	-3.17975	0.00147402	0.00486523
APOA2	5.25466	0.0213656	0.40239	0.0530968	0.957655	0.975034
APOA4	0.667314	-1.44916	0.500223	-2.89703	0.00376717	0.0111246
APOA5	0.587001	0.414527	0.322603	1.28494	0.198812	0.312408
APOB	7.65771	-0.717478	0.323338	-2.21898	0.0264884	0.0595314
APOBEC1	0.0189631	-0.0410628	2.15206	-0.0190807	0.984777	NA
APOBEC2	3.8154	-0.0508317	0.151166	-0.336263	0.736672	0.824192
APOBEC3A	30.9798	0.797911	0.162949	4.89669	9.74652e-07	6.18535e-06
APOBEC3B	245.903	0.0486536	0.0965244	0.504055	0.614223	0.727341
APOBEC3C	790.641	0.384262	0.0782048	4.91353	8.94496e-07	5.7127e-06
APOBEC3D	146.723	1.13445	0.114572	9.90164	4.09492e-23	1.23647e-21
APOBEC3F	227.519	0.741181	0.0995359	7.44636	9.59493e-14	1.3483e-12
APOBEC3G	477.927	1.10943	0.116695	9.50713	1.95996e-21	5.10415e-20
APOBEC3H	19.7138	1.37934	0.11705	11.7842	4.70753e-32	3.01844e-30
APOBEC4	0.49156	-0.626659	0.296984	-2.11007	0.034852	0.0751287
APOC1	3607.1	0.961237	0.16037	5.99387	2.0491e-09	1.84648e-08
APOC1P1	4.33874	0.890991	0.191178	4.66052	3.15406e-06	1.8352e-05
APOC2	1496.41	0.555629	0.217107	2.55924	0.0104902	0.0269653
APOC3	3.6849	-0.826199	0.769722	-1.07337	0.283104	0.410289
APOC4	5.62598	1.07746	0.240612	4.47802	7.53387e-06	4.13259e-05
APOD	31366.5	-0.745121	0.183004	-4.07162	4.66872e-05	0.000217982
APOE	37622.8	0.572226	0.136503	4.19203	2.76468e-05	0.000135862
APOF	0.598339	0.712192	0.278768	2.55479	0.0106253	0.027256
APOH	3.18841	-0.409231	0.606092	-0.675197	0.499551	0.625279
APOL1	1796.45	1.55052	0.117371	13.2104	7.63889e-40	9.45694e-38
APOL2	1223.06	0.801774	0.0716156	11.1955	4.28836e-29	2.04798e-27
APOL3	649.813	1.62446	0.114318	14.2101	7.93539e-46	1.61661e-43
APOL4	191.461	1.35106	0.125075	10.802	3.36646e-27	1.38923e-25
APOL5	0.514262	-0.349965	0.237604	-1.47289	0.14078	0.238145
APOL6	1581.37	1.38695	0.0905623	15.3148	6.08552e-53	2.27768e-50
APOLD1	562.809	-0.358133	0.131306	-2.72746	0.00638239	0.0176727
APOM	35.355	-0.0888423	0.116062	-0.765471	0.443991	0.57506
APOO	382.504	0.116712	0.0691412	1.68802	0.0914072	0.16805
APOOL	154.653	0.0346484	0.0533852	0.649026	0.516322	0.640784
APP	20189.5	-0.413763	0.0982097	-4.21306	2.51938e-05	0.000124914
APPBP2	838.632	0.0150127	0.0445114	0.337279	0.735907	0.823889
APPL1	985.032	-0.00451249	0.0461829	-0.0977091	0.922163	0.951853
APPL2	846.915	-0.12885	0.0505486	-2.54903	0.0108024	0.0276528
APRT	1893.88	-0.19823	0.074793	-2.65038	0.00804019	0.0214485
APTX	479.281	-0.00541161	0.0440732	-0.122787	0.902276	0.940007
AQP1	2869.48	-1.03103	0.136854	-7.53375	4.93022e-14	7.13551e-13
AQP10	0.664984	-1.08755	0.273856	-3.97124	7.15004e-05	0.000321882
AQP11	43.4492	-0.0415912	0.123082	-0.337915	0.735427	0.823889
AQP12A	0.140886	0.0269319	0.514085	0.0523881	0.958219	0.975309
AQP12B	0.946935	-0.134456	0.281733	-0.477246	0.633187	0.743128
AQP2	0.766497	0.0811996	0.3063	0.265099	0.790933	0.863061
AQP3	578.59	-2.11315	0.206338	-10.2412	1.29615e-24	4.29225e-23
AQP4	17.2024	0.00308608	0.249602	0.012364	0.990135	0.99356
AQP5	27.5855	-2.14283	0.260597	-8.22276	1.98876e-16	3.52501e-15
AQP6	7.09271	0.319406	0.174041	1.83524	0.0664704	0.129231
AQP7	8.12555	-0.651168	0.197508	-3.29692	0.000977509	0.00338688
AQP8	0.956918	0.00372847	0.195807	0.0190416	0.984808	0.990718
AQP9	64.2882	0.437175	0.180075	2.42774	0.0151931	0.0369841
AQR	850.194	-0.02517	0.0454166	-0.554203	0.57944	0.697508
AR	11.2635	-0.194096	0.168964	-1.14874	0.250664	0.373053
ARAF	1123.51	0.0902432	0.0530048	1.70255	0.088653	0.16381
ARAP1	2672.6	0.127212	0.065181	1.95167	0.0509769	0.103549
ARAP2	327.315	0.71362	0.110829	6.43891	1.20333e-10	1.25592e-09
ARAP3	905.664	-0.315598	0.101967	-3.09511	0.0019674	0.00626253
ARC	79.1275	-0.8916	0.198358	-4.49491	6.95991e-06	3.84062e-05
ARCN1	3210.74	-0.152235	0.0513836	-2.96271	0.00304939	0.00924583
AREG	35.3663	-1.74455	0.202149	-8.63002	6.13408e-18	1.22332e-16
ARF1	9232.38	-0.0501263	0.0771633	-0.649613	0.515942	0.640362
ARF3	5082.93	0.0458306	0.0622455	0.736288	0.461555	0.590483
ARF4	4075.28	-0.200342	0.0594902	-3.36765	0.000758131	0.00269584
ARF5	2683.52	-0.0899485	0.0761759	-1.1808	0.237682	0.359246
ARF6	2472.72	0.19031	0.0611466	3.11235	0.00185603	0.0059599
ARFGAP1	3007.14	-0.103207	0.0785251	-1.31432	0.188739	0.300052
ARFGAP2	1680.36	0.00369918	0.0504501	0.0733236	0.941549	0.964747
ARFGAP3	1170.92	-0.0396172	0.0558656	-0.709152	0.47823	0.605082
ARFGEF1	1245.65	-0.0150531	0.0594204	-0.253332	0.800012	0.869254
ARFGEF2	2270.55	0.00415283	0.0636576	0.065237	0.947985	0.96906
ARFIP1	704.21	-0.00250295	0.0627506	-0.0398873	0.968183	0.98066
ARFIP2	731.53	-0.0556522	0.0631215	-0.881668	0.377956	0.510328
ARFRP1	827.687	-0.0930132	0.0603905	-1.5402	0.123513	0.214089
ARG1	19.5012	-3.24165	0.354761	-9.13756	6.38801e-20	1.50305e-18
ARG2	235.934	-0.399769	0.0819414	-4.87872	1.06778e-06	6.74709e-06
ARGFX	0.198176	0.0398626	0.348957	0.114234	0.909053	0.944444
ARGLU1	1595.55	0.112737	0.0735396	1.53301	0.125273	0.216649
ARHGAP1	2694.56	-0.117649	0.0633098	-1.85831	0.0631254	0.123788
ARHGAP10	292.908	-0.274675	0.0754973	-3.63821	0.000274539	0.00108348
ARHGAP11A	479.216	-0.129307	0.0751718	-1.72016	0.0854041	0.158984
ARHGAP11B	40.2054	-0.0366659	0.141848	-0.258488	0.796031	0.866297
ARHGAP12	661.102	0.113417	0.0633494	1.79034	0.0733994	0.140229
ARHGAP15	168.874	0.9734	0.142803	6.81637	9.33668e-12	1.09442e-10
ARHGAP17	1382.58	0.0726152	0.0505394	1.4368	0.150774	0.251378
ARHGAP18	690.163	0.335737	0.0850155	3.94912	7.84377e-05	0.000349883
ARHGAP19	415.111	0.0296647	0.0961464	0.308536	0.757674	0.840507
ARHGAP20	169.191	-0.318161	0.14431	-2.20471	0.0274748	0.0613711
ARHGAP21	1586.76	-0.044319	0.0654889	-0.676742	0.49857	0.624677
ARHGAP22	116.468	-0.396905	0.121482	-3.26719	0.00108623	0.00371083
ARHGAP23	906.652	-0.418141	0.094814	-4.41012	1.03311e-05	5.5294e-05
ARHGAP24	427.544	-0.0559222	0.110692	-0.505205	0.613415	0.726904
ARHGAP25	379.829	1.18948	0.115571	10.2922	7.63914e-25	2.60475e-23
ARHGAP26	406.223	0.268969	0.0771587	3.48592	0.000490452	0.00183055
ARHGAP27	286.067	0.696753	0.097787	7.12521	1.03921e-12	1.33908e-11
ARHGAP28	168.807	-0.314613	0.129601	-2.42755	0.0152013	0.0369841
ARHGAP29	426.57	-0.55772	0.116362	-4.79299	1.64313e-06	9.98661e-06
ARHGAP30	766.407	1.25222	0.119604	10.4697	1.1901e-25	4.26581e-24
ARHGAP31	1623.27	-0.116025	0.088434	-1.31199	0.189522	0.301014
ARHGAP32	756.508	-0.39207	0.0828951	-4.72971	2.2484e-06	1.33379e-05
ARHGAP33	170.678	-0.0766188	0.079825	-0.959836	0.337138	0.468922
ARHGAP36	0.798823	-1.11732	0.361891	-3.08745	0.0020188	0.00640588
ARHGAP39	591.83	-0.120852	0.105361	-1.14703	0.25137	0.373826
ARHGAP4	1051.95	0.7113	0.104725	6.7921	1.10509e-11	1.28507e-10
ARHGAP42	387.936	-0.23666	0.104435	-2.26609	0.0234461	0.0534857
ARHGAP5	2092.87	-0.160974	0.069272	-2.3238	0.0201362	0.0469602
ARHGAP6	103.864	-0.47084	0.157431	-2.99078	0.00278269	0.00853193
ARHGAP8	90.8759	-0.224113	0.220795	-1.01503	0.310093	0.440431
ARHGAP9	315.831	1.70695	0.131651	12.9657	1.9148e-38	2.14006e-36
ARHGDIA	10014.3	-0.0283002	0.0755154	-0.37476	0.707839	0.802665
ARHGDIB	2516.3	0.989116	0.10333	9.57244	1.04415e-21	2.7776e-20
ARHGDIG	6.56397	-1.34359	0.265538	-5.05987	4.19536e-07	2.80166e-06
ARHGEF1	2595.06	0.355966	0.0643502	5.5317	3.17134e-08	2.46926e-07
ARHGEF10	774.987	-0.256946	0.0699883	-3.67127	0.000241344	0.000966216
ARHGEF10L	714.227	-0.00730343	0.0657426	-0.111091	0.911544	0.945362
ARHGEF11	3610.9	0.014531	0.0620062	0.234347	0.814716	0.879621
ARHGEF12	2640.47	-0.237471	0.0569266	-4.17153	3.02559e-05	0.000147646
ARHGEF15	141.235	-0.662706	0.10644	-6.22609	4.78213e-10	4.61967e-09
ARHGEF16	91.7969	-0.746737	0.180212	-4.14366	3.41811e-05	0.000164901
ARHGEF17	1103.14	-0.425065	0.0873069	-4.86863	1.12373e-06	7.06735e-06
ARHGEF18	1052.95	0.235405	0.0708383	3.32313	0.00089012	0.00311536
ARHGEF19	168.414	-0.556145	0.102824	-5.4087	6.34856e-08	4.73904e-07
ARHGEF2	3555.88	-0.181522	0.0734872	-2.47012	0.0135069	0.033443
ARHGEF3	467.111	0.379441	0.0769846	4.9288	8.27382e-07	5.30936e-06
ARHGEF33	18.0496	0.0514895	0.133391	0.386005	0.699493	0.796156
ARHGEF35	202.51	-0.295436	0.177792	-1.66169	0.0965747	0.175604
ARHGEF37	231.425	-0.416279	0.158887	-2.61997	0.00879363	0.0232274
ARHGEF38	0.543095	-0.343915	0.257482	-1.33568	0.181652	0.291419
ARHGEF4	129.599	-1.26033	0.193606	-6.50976	7.52729e-11	8.0228e-10
ARHGEF5	241.885	-0.355115	0.164064	-2.1645	0.0304263	0.0669695
ARHGEF6	689.988	0.134224	0.104243	1.2876	0.197885	0.311193
ARHGEF7	1342.45	-0.115429	0.053891	-2.14189	0.032202	0.0703487
ARHGEF9	392.878	-0.0968243	0.0704355	-1.37465	0.169239	0.275506
ARID1A	2518.36	-0.107528	0.0644638	-1.66804	0.0953075	0.173634
ARID1B	1616.78	-0.0408762	0.0603587	-0.677221	0.498266	0.624491
ARID2	631.961	-0.0183435	0.0576542	-0.318165	0.75036	0.834979
ARID3A	132.656	0.136375	0.0717925	1.89957	0.0574899	0.114226
ARID3B	144.664	0.249752	0.0788246	3.16845	0.00153253	0.00503358
ARID3C	1.15859	-0.354416	0.169775	-2.08757	0.0368366	0.0786895
ARID4A	399.62	0.163064	0.0723405	2.25412	0.0241887	0.0548995
ARID4B	841.986	0.0817018	0.0683443	1.19544	0.231914	0.352481
ARID5A	619.701	0.441651	0.0832092	5.30771	1.1101e-07	7.99372e-07
ARID5B	1659.38	0.190009	0.0775837	2.44909	0.0143218	0.0351471
ARIH1	1447.99	0.0339581	0.041288	0.822469	0.41081	0.543447
ARIH2	1614.57	-0.0317894	0.0380603	-0.83524	0.403583	0.536532
ARL1	1360.69	0.0378279	0.0503263	0.751653	0.45226	0.582527
ARL10	73.0825	-0.469156	0.113886	-4.11952	3.79656e-05	0.000181203
ARL11	38.4141	1.19101	0.119819	9.94014	2.78432e-23	8.56804e-22
ARL13A	0.749673	-0.362044	0.221869	-1.63179	0.102723	0.184677
ARL13B	186.194	-0.0756374	0.0588276	-1.28575	0.198532	0.311998
ARL14	1.32002	-1.15986	0.270323	-4.29062	1.78172e-05	9.14092e-05
ARL15	206.833	-0.0461458	0.0706404	-0.653249	0.513596	0.638345
ARL16	387.871	-0.135711	0.071037	-1.91043	0.0560774	0.111932
ARL17A	77.7979	0.196691	0.0789274	2.49205	0.0127007	0.0317993
ARL2	2028	-0.0595666	0.0859025	-0.693421	0.488046	0.614601
ARL2BP	1351.64	-0.161864	0.050384	-3.21261	0.00131533	0.00440193
ARL3	273.804	-0.00844512	0.0641405	-0.131666	0.895249	0.935714
ARL4A	457.993	-0.243353	0.0932491	-2.60971	0.00906203	0.0238152
ARL4C	813.199	0.157794	0.110552	1.42733	0.153483	0.254945
ARL4D	166.987	-0.565431	0.112819	-5.01185	5.39083e-07	3.54992e-06
ARL5A	625.566	0.0184163	0.0559369	0.329233	0.74198	0.828517
ARL5B	176.12	0.0129795	0.0809295	0.16038	0.872582	0.920452
ARL5C	0.573005	0.086235	0.206541	0.41752	0.676298	0.778398
ARL6	60.0843	-0.116865	0.0811728	-1.43971	0.149949	0.250392
ARL6IP1	3667.46	0.0229677	0.0609446	0.376862	0.706276	0.801269
ARL6IP4	2398.31	0.0333606	0.067162	0.496718	0.619388	0.731669
ARL6IP5	3005.51	0.226026	0.060941	3.70894	0.000208131	0.00084438
ARL6IP6	289.57	-0.0631012	0.0663837	-0.950553	0.341831	0.473731
ARL8A	1364.88	0.0742884	0.0594104	1.25043	0.211143	0.3275
ARL8B	1793.43	0.0568513	0.0516773	1.10012	0.27128	0.39669
ARL9	9.62842	-0.25445	0.148474	-1.71376	0.0865721	0.160795
ARMC1	591.737	-0.00880822	0.0635381	-0.138629	0.889743	0.931918
ARMC10	683.841	-0.114803	0.0611245	-1.87818	0.0603565	0.118983
ARMC2	32.9366	0.0904134	0.0783774	1.15356	0.248679	0.370719
ARMC3	3.46484	0.652241	0.246921	2.6415	0.00825404	0.021968
ARMC4	5.1961	-2.27982	0.333933	-6.82716	8.66124e-12	1.01822e-10
ARMC5	391.228	-0.152299	0.0719549	-2.11659	0.0342943	0.0742443
ARMC6	883.874	-0.00135346	0.0654327	-0.0206848	0.983497	0.989832
ARMC7	311.947	0.0652606	0.0729751	0.894286	0.371169	0.503209
ARMC8	576.335	0.0315241	0.0341017	0.924415	0.35527	0.486904
ARMC9	733.765	-0.206324	0.0945014	-2.1833	0.0290141	0.064292
ARMCX1	553.734	-0.0160087	0.0840395	-0.190491	0.848925	0.903551
ARMCX2	599.41	-0.00715128	0.120822	-0.0591884	0.952802	0.972378
ARMCX3	1109.54	-0.0166463	0.091823	-0.181287	0.856142	0.90817
ARMCX5	331.142	-0.0612829	0.069463	-0.882239	0.377648	0.510129
ARMCX6	250.591	-0.0693549	0.0729759	-0.95038	0.341919	0.473783
ARMS2	0.508997	-0.36486	0.245905	-1.48374	0.137877	0.234071
ARNT	1299.75	-0.129462	0.0422025	-3.06763	0.0021576	0.00679141
ARNT2	2993.54	-0.0353394	0.103067	-0.34288	0.731689	0.8213
ARNTL	141.336	0.168115	0.0593719	2.83156	0.00463213	0.0133529
ARNTL2	69.3064	-0.753863	0.161312	-4.67331	2.96384e-06	1.73014e-05
ARPC1A	3811.53	-0.228586	0.0602923	-3.79129	0.000149865	0.000628106
ARPC1B	10348.8	0.0370419	0.081898	0.452292	0.651058	0.758351
ARPC2	4742.74	0.00178917	0.0436463	0.0409924	0.967302	0.980323
ARPC3	3165.67	0.196806	0.0464228	4.23942	2.24094e-05	0.000112424
ARPC4	3559.08	0.115971	0.068222	1.6999	0.0891497	0.164557
ARPC5	3194.46	0.142598	0.0653675	2.18149	0.0291474	0.0645429
ARPC5L	635.366	0.0189431	0.0732922	0.25846	0.796052	0.866297
ARPP19	2855.44	0.0547322	0.0620168	0.882538	0.377486	0.510054
ARPP21	28.579	0.195241	0.305888	0.638278	0.523293	0.647139
ARR3	0.357322	-0.131918	0.231914	-0.568824	0.569476	0.688746
ARRB1	687.033	0.0971117	0.0816989	1.18865	0.234576	0.355654
ARRB2	807.929	0.632148	0.0792577	7.97585	1.5133e-15	2.4954e-14
ARRDC1	485.579	0.311419	0.0704624	4.41964	9.88634e-06	5.3161e-05
ARRDC2	489.737	0.374644	0.0766779	4.88595	1.0293e-06	6.51675e-06
ARRDC3	1506.21	-0.0926197	0.0883587	-1.04822	0.294535	0.423199
ARRDC4	683.641	-0.0520473	0.0959207	-0.542608	0.5874	0.704495
ARRDC5	5.75473	1.70093	0.151602	11.2197	3.26259e-29	1.57682e-27
ARSA	1192.85	0.112141	0.0866302	1.29447	0.195502	0.308441
ARSB	773.696	-0.0169884	0.0611771	-0.277693	0.781248	0.856312
ARSD	834.893	-0.110504	0.0805633	-1.37164	0.170175	0.276567
ARSF	2.59107	-2.99331	0.414483	-7.2218	5.13055e-13	6.79038e-12
ARSG	169.778	0.069309	0.102099	0.67884	0.497239	0.623642
ARSH	1.25704	0.339172	0.276384	1.22718	0.219756	0.337702
ARSI	347.857	-0.0941561	0.169881	-0.554249	0.579409	0.697508
ARSJ	91.0122	-0.469823	0.130793	-3.59212	0.000328	0.00127262
ARSK	181.212	-0.0527174	0.0724553	-0.727585	0.466867	0.595242
ART1	0.488923	0.23158	0.396706	0.583756	0.559384	0.679964
ART3	67.2772	-0.5475	0.209277	-2.61615	0.0088928	0.0234586
ART4	7.58518	0.611324	0.230299	2.65447	0.00794322	0.021225
ART5	5.09298	-0.529692	0.184295	-2.87416	0.00405109	0.0118693
ARTN	8.09945	-1.10685	0.155282	-7.12801	1.01834e-12	1.31428e-11
ARV1	434.372	0.112634	0.0603464	1.86645	0.0619778	0.121821
ARVCF	236.088	-0.399239	0.0946843	-4.21653	2.48094e-05	0.000123121
ARX	15.3683	-0.297333	0.250795	-1.18556	0.235796	0.357134
AS3MT	91.3802	0.0397059	0.150765	0.263364	0.79227	0.863875
ASAH1	8613.84	0.0734666	0.0862137	0.852145	0.394134	0.527105
ASAH2	4.53326	-0.032435	0.131679	-0.246319	0.805435	0.87301
ASAH2B	6.73779	-0.00795247	0.148466	-0.0535643	0.957282	0.97491
ASAP1	2580.26	-0.207328	0.0680945	-3.0447	0.00232911	0.00727292
ASAP2	1236.14	-0.352332	0.0603602	-5.83715	5.31018e-09	4.56888e-08
ASAP3	419.472	-0.306635	0.0951549	-3.22248	0.00127085	0.00426282
ASB1	482.281	-0.382617	0.060122	-6.36401	1.96547e-10	1.99951e-09
ASB10	1.07583	-0.701723	0.491869	-1.42665	0.153681	0.255225
ASB11	51.0562	-0.0895989	0.272652	-0.32862	0.742443	0.828862
ASB12	2.21407	0.34365	0.156639	2.1939	0.0282429	0.062782
ASB13	492.762	-0.00738467	0.085338	-0.0865345	0.931042	0.958497
ASB14	9.72625	0.0355035	0.0909354	0.390426	0.696222	0.793554
ASB15	0.36043	0.168944	0.252975	0.667828	0.504244	0.629825
ASB16	13.1309	-0.015145	0.0831211	-0.182204	0.855423	0.907731
ASB17	0.255347	-0.502189	0.477971	-1.05067	0.293411	0.421847
ASB18	0.119263	-0.145271	0.525193	-0.276605	0.782084	NA
ASB2	213.058	0.803994	0.12523	6.42012	1.36167e-10	1.41294e-09
ASB3	280.561	-0.076688	0.0416432	-1.84155	0.065541	0.127795
ASB4	18.6919	-0.363111	0.261599	-1.38805	0.165123	0.269796
ASB5	1.15524	-0.726359	0.359418	-2.02093	0.0432869	0.0902993
ASB6	831.307	-0.0521636	0.0689647	-0.756381	0.449421	0.579751
ASB7	373.739	0.146755	0.0487029	3.01326	0.00258454	0.00799453
ASB8	474.921	0.0784572	0.0384761	2.03912	0.0414383	0.0870978
ASB9	305.721	0.160647	0.113135	1.41996	0.15562	0.25765
ASCC1	406.7	0.0054716	0.04873	0.112284	0.910598	0.945251
ASCC2	1730.05	-0.0890425	0.0585861	-1.51986	0.128547	0.221337
ASCC3	911.147	-0.00453709	0.0771944	-0.0587748	0.953131	0.972529
ASCL1	6.98214	0.243016	0.231808	1.04835	0.294478	0.423168
ASCL2	24.7369	1.7826	0.162081	10.9982	3.89844e-28	1.70493e-26
ASCL3	0.294541	0.00525461	0.306519	0.0171429	0.986323	0.991457
ASCL4	3.49395	-1.49582	0.349147	-4.28423	1.83376e-05	9.38394e-05
ASF1A	277.422	0.0486099	0.0651456	0.746173	0.455563	0.585797
ASF1B	449.083	0.0813597	0.103279	0.78777	0.430831	0.56258
ASGR1	22.8638	0.091004	0.147576	0.616658	0.537461	0.659389
ASGR2	12.299	0.679168	0.160848	4.22242	2.41695e-05	0.000120466
ASH1L	1751.36	-0.20757	0.075867	-2.73598	0.00621957	0.0172731
ASH2L	1287.3	-0.0595982	0.0518576	-1.14927	0.250446	0.372762
ASIP	5.44363	0.732923	0.173118	4.23367	2.29907e-05	0.000115125
ASL	687.649	-0.227842	0.0694212	-3.28202	0.00103066	0.00354583
ASMT	1.89356	1.15199	0.149432	7.70911	1.26703e-14	1.93285e-13
ASMTL	570.724	-0.0409465	0.0650356	-0.629602	0.528955	0.651838
ASNS	538.161	-0.403234	0.126545	-3.18649	0.00144008	0.00476396
ASNSD1	758.075	-0.127904	0.0484723	-2.6387	0.00832245	0.0221318
ASPA	99.0527	0.412323	0.158668	2.59865	0.00935907	0.0244821
ASPDH	0.894377	-0.0296369	0.189419	-0.156462	0.875669	0.92274
ASPG	6.37954	-1.57744	0.274481	-5.74701	9.0836e-09	7.60226e-08
ASPH	3311.62	-0.404366	0.0744881	-5.4286	5.67989e-08	4.26363e-07
ASPHD1	160.397	-0.370214	0.149611	-2.4745	0.0133421	0.0331269
ASPHD2	130.332	0.460298	0.0888149	5.18266	2.18741e-07	1.50832e-06
ASPM	737.69	-0.175561	0.097773	-1.7956	0.072558	0.138952
ASPN	178.29	-0.751338	0.153429	-4.89697	9.73271e-07	6.17902e-06
ASPRV1	197.75	-2.74823	0.197362	-13.9248	4.4757e-44	7.66297e-42
ASPSCR1	691.245	0.0851178	0.0723875	1.17586	0.23965	0.361439
ASRGL1	252.577	-0.0893599	0.115649	-0.772679	0.439712	0.570934
ASS1	265.45	-0.545438	0.18155	-3.00435	0.0026615	0.00821208
ASTE1	159.276	0.0263021	0.0465202	0.565391	0.571808	0.690943
ASTL	2.02906	0.460443	0.144409	3.18845	0.00143036	0.00473765
ASTN1	11.8853	-1.90535	0.266114	-7.15992	8.07271e-13	1.052e-11
ASTN2	229.724	-0.644422	0.141825	-4.54378	5.52555e-06	3.10938e-05
ASXL1	2442.92	-0.12795	0.055247	-2.31597	0.0205601	0.0478379
ASXL2	714.088	0.0548125	0.0573616	0.955561	0.339294	0.471284
ASXL3	3.27826	-1.45961	0.212618	-6.86495	6.65138e-12	7.87692e-11
ASZ1	0.187268	-0.297177	0.75589	-0.393149	0.69421	0.791934
ATAD1	909.255	0.0780026	0.07073	1.10282	0.270105	0.395447
ATAD2	968.726	-0.0626779	0.0732846	-0.855267	0.392403	0.525233
ATAD2B	258.464	-0.0144102	0.0600318	-0.240043	0.810297	0.876524
ATAD3A	1440.42	-0.113576	0.0750805	-1.51272	0.130351	0.223773
ATAD3B	647.631	-0.111415	0.0857513	-1.29928	0.193847	0.306341
ATAD3C	28.3222	-0.233048	0.139673	-1.66853	0.0952113	0.173498
ATAD5	125.556	0.048932	0.0721003	0.678666	0.497349	0.623731
ATCAY	1.82648	-1.63343	0.313216	-5.21502	1.83795e-07	1.28386e-06
ATE1	214.094	0.0570165	0.0525738	1.0845	0.278142	0.404808
ATF1	276.068	0.0530575	0.0491168	1.08023	0.280039	0.406746
ATF2	469.36	-0.0200092	0.0504418	-0.39668	0.691604	0.789745
ATF3	324.13	0.0213064	0.115458	0.184538	0.853591	0.90648
ATF4	5894.11	-0.0144189	0.0676303	-0.213202	0.83117	0.891136
ATF5	992.007	0.591419	0.0995126	5.94315	2.79589e-09	2.49015e-08
ATF6	1369.85	-0.0942001	0.0395956	-2.37905	0.0173572	0.0414276
ATF6B	2563.78	0.0994119	0.0540114	1.84057	0.0656841	0.128027
ATF7	1098.17	-0.131114	0.0457749	-2.86432	0.00417909	0.0121867
ATF7IP	966.644	0.0655179	0.0553014	1.18474	0.23612	0.357455
ATF7IP2	91.6973	0.305774	0.126823	2.41103	0.0159075	0.0384697
ATG10	97.664	0.0619942	0.0578726	1.07122	0.284071	0.411433
ATG12	455.611	0.0899126	0.0498716	1.80288	0.0714065	0.137154
ATG16L1	629.685	-0.0593745	0.0508016	-1.16875	0.242503	0.364139
ATG16L2	228.818	0.395062	0.0858456	4.60201	4.18432e-06	2.39909e-05
ATG2A	1119.67	0.0351073	0.0723812	0.485033	0.627653	0.73895
ATG2B	831.437	-0.0680474	0.0479445	-1.41929	0.155813	0.257857
ATG3	855.98	0.146695	0.0423428	3.46445	0.000531308	0.00196482
ATG4A	219.616	0.135031	0.0528166	2.5566	0.0105702	0.0271535
ATG4B	1329.04	0.034187	0.0683289	0.50033	0.616843	0.729532
ATG4C	228.147	0.0626323	0.0628065	0.997226	0.318655	0.449389
ATG4D	498.055	-0.0278416	0.0763636	-0.364593	0.715415	0.808509
ATG5	405.545	0.119402	0.0492911	2.42239	0.0154189	0.0374005
ATG7	719.103	0.153474	0.0489529	3.13513	0.00171779	0.00556373
ATG9A	1915.11	-0.231266	0.0570222	-4.05572	4.99806e-05	0.000232415
ATG9B	43.6491	-0.579229	0.156605	-3.69867	0.000216732	0.000875083
ATIC	2464.47	-0.176918	0.049628	-3.56489	0.000364008	0.00139684
ATL1	166.064	-0.0910261	0.0952946	-0.955208	0.339473	0.471396
ATL2	765.865	-0.194385	0.0513207	-3.78766	0.000152072	0.00063636
ATL3	545.272	-0.218684	0.0529741	-4.12814	3.65711e-05	0.000175015
ATM	2074.35	0.158466	0.080582	1.96652	0.0492388	0.100692
ATMIN	1153.7	-0.0808216	0.0403781	-2.00162	0.0453255	0.093907
ATN1	4270.25	-0.261311	0.0668251	-3.91038	9.21526e-05	0.000404446
ATOH1	0.0682567	-0.182012	0.984813	-0.184818	0.853371	NA
ATOH7	2.2382	0.00919132	0.147664	0.0622448	0.950368	0.970632
ATOH8	263.03	0.183019	0.140497	1.30265	0.192694	0.305027
ATOX1	1761.75	0.0637769	0.0942652	0.676569	0.498679	0.624677
ATP10A	1106.37	0.436026	0.127715	3.41407	0.000640009	0.0023193
ATP10B	363.617	-0.134942	0.163682	-0.824416	0.409703	0.542446
ATP10D	506.76	-0.135922	0.0745899	-1.82225	0.0684165	0.132391
ATP11A	1551.63	0.110228	0.106712	1.03295	0.301629	0.43135
ATP11B	1119.26	-0.023504	0.0628754	-0.373819	0.708539	0.803044
ATP11C	434.948	0.0225223	0.0731023	0.308092	0.758012	0.840749
ATP12A	13.2119	-2.45365	0.269732	-9.09662	9.31851e-20	2.15787e-18
ATP13A1	2366.67	0.0185988	0.0623968	0.298073	0.765648	0.846024
ATP13A2	2318.26	0.107036	0.0773909	1.38306	0.166648	0.271873
ATP13A3	1848.04	-0.077446	0.0540666	-1.43242	0.152024	0.253122
ATP13A4	9.52643	-1.35934	0.213577	-6.36464	1.95747e-10	1.99263e-09
ATP13A5	1.25231	-0.825907	0.341893	-2.41569	0.0157056	0.038027
ATP1A1	48838.5	0.0355051	0.0761893	0.466012	0.641207	0.74997
ATP1A2	54.2968	-1.93941	0.224395	-8.64285	5.48295e-18	1.09891e-16
ATP1A3	95.0183	0.697763	0.195117	3.57613	0.000348715	0.00134553
ATP1A4	3.86536	0.54388	0.219785	2.4746	0.0133386	0.0331269
ATP1B1	1551.53	0.149447	0.125958	1.18649	0.23543	0.356663
ATP1B2	565.947	-0.607543	0.199149	-3.0507	0.00228306	0.0071444
ATP1B3	3527.7	-0.226074	0.0756162	-2.98975	0.00279205	0.00855096
ATP1B4	0.385971	-0.238104	0.371321	-0.641235	0.52137	0.645655
ATP2A1	19.7176	-0.252221	0.135984	-1.85478	0.063627	0.124561
ATP2A2	7661.67	-0.150108	0.0578422	-2.59512	0.00945569	0.0247087
ATP2A3	903.347	1.07465	0.138752	7.7451	9.5506e-15	1.4737e-13
ATP2B1	1459.53	-0.350469	0.0806919	-4.34329	1.40363e-05	7.34396e-05
ATP2B2	11.5803	-1.29139	0.193587	-6.67085	2.54324e-11	2.85233e-10
ATP2B3	11.1112	0.759887	0.265671	2.86026	0.00423299	0.0123349
ATP2B4	4299.04	-0.112058	0.0634397	-1.76637	0.0773344	0.146529
ATP2C1	2250.16	-0.0407249	0.0420735	-0.967947	0.333071	0.46459
ATP2C2	17.7755	-1.71458	0.189632	-9.04158	1.54428e-19	3.53537e-18
ATP4A	2.58408	0.307547	0.200583	1.53326	0.125211	0.216566
ATP4B	1.91205	-0.844449	0.280544	-3.01004	0.00261215	0.00807217
ATP6AP1	6027.79	-0.0172885	0.0735831	-0.234953	0.814245	0.879584
ATP6AP1L	32.9548	0.325984	0.0854644	3.81426	0.000136589	0.000577578
ATP6AP2	3343.18	0.0553777	0.0431557	1.28321	0.199419	0.312964
ATP6V0A1	2998.97	-0.00308634	0.0712619	-0.0433098	0.965455	0.979693
ATP6V0A2	615.728	-0.000565051	0.0460049	-0.0122824	0.9902	0.99356
ATP6V0A4	162.744	-0.159551	0.215846	-0.739188	0.459793	0.589211
ATP6V0B	2967.27	0.0353152	0.0821412	0.429933	0.667244	0.771042
ATP6V0C	5302.52	0.0601636	0.0925606	0.649991	0.515698	0.640193
ATP6V0D1	2518.06	-0.0779203	0.0671064	-1.16114	0.245583	0.367393
ATP6V0D2	123.358	0.253525	0.235559	1.07627	0.281807	0.408926
ATP6V0E1	2689.11	0.1718	0.0665015	2.5834	0.00978332	0.0253986
ATP6V0E2	1530.24	-0.163897	0.125296	-1.30808	0.190847	0.302551
ATP6V1A	2256.8	0.0591015	0.0455485	1.29755	0.194442	0.30704
ATP6V1B1	69.8065	-0.373803	0.12514	-2.98708	0.00281655	0.00861943
ATP6V1B2	6861.64	0.0942247	0.0716523	1.31503	0.188501	0.299806
ATP6V1C1	2347.72	0.0734574	0.0666387	1.10232	0.270321	0.395615
ATP6V1C2	130.411	-0.447054	0.119749	-3.73327	0.000189013	0.000773057
ATP6V1D	1298.33	0.0189376	0.0552015	0.343064	0.73155	0.8213
ATP6V1E1	3159.54	-0.000876878	0.0577484	-0.0151845	0.987885	0.992139
ATP6V1E2	80.2204	0.00561745	0.0930551	0.0603669	0.951863	0.971851
ATP6V1F	3378.57	-0.00379137	0.0967762	-0.0391766	0.96875	0.980878
ATP6V1G1	2350.06	0.177183	0.0672681	2.63399	0.00843891	0.022386
ATP6V1G2	24.1645	-0.180494	0.115834	-1.55822	0.119181	0.208195
ATP6V1G3	0.173501	-0.381459	0.437698	-0.871512	0.383475	0.515679
ATP6V1H	1412.11	0.0540616	0.0506779	1.06677	0.286076	0.413592
ATP7A	768.027	0.182736	0.0717373	2.5473	0.0108561	0.0277815
ATP7B	191.019	-0.505215	0.101471	-4.97891	6.3942e-07	4.17647e-06
ATP8A1	395.436	0.520888	0.136028	3.82927	0.000128525	0.000546349
ATP8A2	98.9321	0.586035	0.166991	3.50939	0.000449142	0.00168929
ATP8B1	132.242	-0.802275	0.108084	-7.42269	1.14761e-13	1.59358e-12
ATP8B2	2489.18	-0.266538	0.0691825	-3.85267	0.000116836	0.000501965
ATP8B3	77.0149	-0.0438193	0.108631	-0.403379	0.686669	0.786343
ATP8B4	53.4298	0.669972	0.108336	6.1842	6.24188e-10	5.93544e-09
ATP8B5P	17.9175	0.207264	0.184425	1.12384	0.261081	0.384959
ATP9A	1683.47	-0.306335	0.104694	-2.926	0.00343351	0.0102426
ATP9B	458.885	-0.0786289	0.0647289	-1.21474	0.224464	0.343103
ATPAF1	808.613	0.0728099	0.0558287	1.30417	0.192177	0.304269
ATPAF2	306.123	-0.00546115	0.050497	-0.108148	0.913878	0.946884
ATR	657.571	0.0665899	0.0507129	1.31308	0.189157	0.300596
ATRIP	269.153	-0.106134	0.0469556	-2.26031	0.0238022	0.0541674
ATRN	2120.89	-0.2321	0.0493674	-4.70148	2.58287e-06	1.51932e-05
ATRNL1	106.21	-0.0268055	0.162922	-0.16453	0.869314	0.918389
ATRX	1448.2	0.108252	0.0779772	1.38825	0.16506	0.269761
ATXN1	854.557	-0.0225764	0.0549162	-0.411106	0.680994	0.782237
ATXN10	1999.51	-0.167047	0.0482915	-3.45915	0.000541885	0.00199888
ATXN1L	974.128	-0.20128	0.0447712	-4.49575	6.93267e-06	3.82759e-05
ATXN2	868.399	-0.175149	0.0648699	-2.70001	0.00693374	0.0189395
ATXN2L	3347.98	-0.00237931	0.0521436	-0.04563	0.963605	0.978748
ATXN3	280.575	0.0313612	0.0442231	0.709159	0.478226	0.605082
ATXN3L	0.933657	1.3806	0.659166	2.09446	0.0362193	0.0775868
ATXN7	542.912	0.238307	0.0636913	3.74159	0.000182858	0.000751513
ATXN7L1	229.624	0.0920408	0.0656801	1.40135	0.16111	0.264663
ATXN7L2	122.586	-0.306886	0.0765299	-4.01002	6.07141e-05	0.000277437
ATXN7L3	1244.08	-0.0248406	0.0463654	-0.535757	0.592127	0.707948
ATXN7L3B	2010.36	-0.119458	0.0807464	-1.47942	0.139028	0.235703
AUH	139.4	0.236895	0.0539208	4.39339	1.11596e-05	5.94907e-05
AUP1	3468.53	-0.0739476	0.0616312	-1.19984	0.230201	0.350341
AURKA	598.384	-0.0565289	0.0768209	-0.735854	0.46182	0.590539
AURKAIP1	1587.43	0.000996392	0.0910748	0.0109404	0.991271	0.994422
AURKB	425.523	-0.0226748	0.0971232	-0.233464	0.815401	0.880093
AURKC	19.9768	0.474124	0.110917	4.27457	1.91506e-05	9.76272e-05
AUTS2	496.234	-0.545464	0.114255	-4.7741	1.80515e-06	1.08973e-05
AVEN	213.584	-0.163375	0.0586562	-2.78529	0.00534796	0.0151639
AVIL	34.9296	-0.0682728	0.115938	-0.588871	0.555948	0.676554
AVL9	384.34	-0.124584	0.0498794	-2.4977	0.0125002	0.0313817
AVP	0.0534401	-0.130747	1.31923	-0.0991088	0.921052	NA
AVPI1	770.469	-0.030639	0.127561	-0.240191	0.810183	0.876524
AVPR1A	32.1975	-0.725193	0.137352	-5.2798	1.29322e-07	9.22154e-07
AVPR1B	0.215061	-0.135939	0.362138	-0.375379	0.707379	0.802294
AVPR2	26.6297	-0.103041	0.130843	-0.787516	0.43098	0.562591
AWAT1	1.02894	-0.575429	0.546942	-1.05208	0.292761	0.421138
AWAT2	1.80298	-1.22376	0.377903	-3.2383	0.00120243	0.00406127
AXIN1	1015.11	-0.106707	0.0500028	-2.13402	0.0328414	0.0714739
AXIN2	189.265	-0.397647	0.133249	-2.98425	0.00284278	0.00869474
AXL	1042.73	-0.100058	0.128163	-0.780707	0.434975	0.566199
AZGP1	869.457	-0.453821	0.192484	-2.3577	0.0183884	0.0435081
AZI2	746.742	0.013941	0.0477827	0.291758	0.770472	0.849139
AZIN1	3134.09	-0.0467759	0.0587515	-0.796166	0.425936	0.557817
AZU1	1.70378	0.19645	0.165499	1.18702	0.235221	0.35643
B2M	52109.8	1.19511	0.0820148	14.5719	4.24193e-48	1.03439e-45
B3GALNT1	192.062	-0.178155	0.12565	-1.41787	0.156228	0.258437
B3GALNT2	510.089	-0.234013	0.0458379	-5.10523	3.30395e-07	2.24267e-06
B3GALT1	44.1577	-0.639914	0.162258	-3.94382	8.0194e-05	0.000357024
B3GALT2	30.5036	-0.0103293	0.146825	-0.0703511	0.943914	0.966248
B3GALT4	184.52	0.374104	0.0934074	4.00508	6.1997e-05	0.000283138
B3GALT5	1.91077	-1.65552	0.259355	-6.38322	1.73402e-10	1.77641e-09
B3GALT6	516.918	-0.301127	0.107216	-2.8086	0.00497581	0.014229
B3GAT1	88.0785	-0.47976	0.209493	-2.29011	0.0220151	0.0506014
B3GAT2	6.40772	0.15165	0.0981187	1.54557	0.122208	0.212352
B3GAT3	1370.82	-0.0358972	0.0718058	-0.499921	0.617131	0.729765
B3GNT2	738.375	0.0436152	0.063379	0.688165	0.491349	0.617891
B3GNT3	15.2538	-1.34549	0.192813	-6.97823	2.98932e-12	3.66973e-11
B3GNT4	11.688	-0.624001	0.137886	-4.5255	6.02535e-06	3.37764e-05
B3GNT5	251.031	-1.15547	0.127942	-9.03121	1.69779e-19	3.87577e-18
B3GNT6	0.355037	-0.228984	0.285622	-0.801702	0.422725	0.554814
B3GNT7	382.329	-0.0922355	0.128729	-0.716512	0.473675	0.601404
B3GNT8	39.2639	-0.21756	0.118241	-1.83997	0.0657721	0.128168
B3GNT9	227.628	-0.450515	0.109059	-4.13094	3.61282e-05	0.000173256
B3GNTL1	103.71	-0.00784958	0.0783062	-0.100242	0.920152	0.950769
B4GALNT1	110.336	-0.693352	0.15222	-4.55494	5.23993e-06	2.96837e-05
B4GALNT2	0.610417	-1.65791	0.515877	-3.21377	0.00131005	0.00438519
B4GALNT3	329.273	-0.735332	0.153389	-4.7939	1.63569e-06	9.95148e-06
B4GALNT4	326.738	-0.690045	0.172522	-3.99976	6.34076e-05	0.00028868
B4GALT1	1979.37	0.0603452	0.0698165	0.86434	0.387401	0.519944
B4GALT2	1219.08	-0.445147	0.0697583	-6.38127	1.75625e-10	1.79804e-09
B4GALT3	1190.96	-0.0552382	0.0584267	-0.945427	0.344441	0.476199
B4GALT4	475.851	0.00521881	0.0521227	0.100125	0.920245	0.950788
B4GALT5	2623.28	0.0111586	0.0794965	0.140367	0.88837	0.931247
B4GALT6	572.99	-0.372305	0.124013	-3.00213	0.00268095	0.00825162
B4GALT7	600.34	0.05717	0.06589	0.867658	0.385581	0.517949
B9D1	173.87	-0.148394	0.0828128	-1.79192	0.0731455	0.139827
B9D2	69.6573	-0.0253145	0.0700037	-0.361616	0.717639	0.81039
BAALC	1239.53	-0.725598	0.200395	-3.62085	0.000293637	0.00115067
BAAT	258.056	-0.0140232	0.26416	-0.0530859	0.957664	0.975034
BACE1	833.348	-0.426437	0.0752146	-5.6696	1.43135e-08	1.16876e-07
BACE2	6180.81	-0.327444	0.0951429	-3.4416	0.000578293	0.00212054
BACH1	1152.89	-0.174433	0.0792786	-2.20026	0.0277888	0.0619779
BACH2	147.482	0.102843	0.118256	0.86966	0.384486	0.516834
BAD	657.934	-0.0878637	0.0795989	-1.10383	0.269667	0.394978
BAG1	908.099	0.00251037	0.0547062	0.0458882	0.963399	0.978655
BAG2	117.656	-0.100413	0.116178	-0.864303	0.387422	0.519944
BAG3	1342.91	-0.266712	0.0698257	-3.81969	0.00013362	0.000566022
BAG4	220.363	-0.0468677	0.0538286	-0.870684	0.383927	0.516157
BAG5	881.91	-0.035287	0.0402685	-0.876295	0.38087	0.513162
BAHCC1	1426.36	-0.013884	0.0874149	-0.158828	0.873804	0.921439
BAHD1	760.272	0.0377215	0.0637837	0.591397	0.554255	0.674999
BAIAP2	1553.85	-0.0894373	0.0830802	-1.07652	0.281696	0.408802
BAIAP2L1	584.311	-0.353712	0.132413	-2.67128	0.00755615	0.0203529
BAIAP2L2	359.522	-0.123335	0.153796	-0.801937	0.422589	0.554785
BAIAP3	70.677	-0.375936	0.1359	-2.76628	0.00567003	0.0159534
BAK1	681.615	0.201679	0.067443	2.99036	0.00278649	0.00853718
BAMBI	1910.62	-0.0324824	0.121687	-0.266934	0.78952	0.862275
BANF1	2468.03	-0.00822685	0.0657237	-0.125173	0.900386	0.938744
BANF2	0.0528743	0.0743883	1.04463	0.0712105	0.94323	NA
BANK1	94.3576	1.70477	0.224189	7.60413	2.86822e-14	4.23496e-13
BANP	282.684	-0.150891	0.0515477	-2.92721	0.00342017	0.0102085
BAP1	2541.41	-0.181383	0.0531301	-3.41395	0.000640292	0.0023193
BARD1	92.6351	-0.0521619	0.0613556	-0.850157	0.395238	0.527968
BARHL1	0.245647	-0.0369696	0.262603	-0.140781	0.888043	0.930969
BARHL2	3.12824	-0.135455	0.237033	-0.571458	0.567689	0.687412
BARX1	6.00543	-1.27297	0.226666	-5.61604	1.95383e-08	1.56833e-07
BARX2	36.001	-1.88552	0.243848	-7.73233	1.056e-14	1.62014e-13
BASP1	388.163	0.241798	0.144663	1.67146	0.0946304	0.172597
BATF	158.901	1.19639	0.122796	9.74286	1.97902e-22	5.58779e-21
BATF2	321.241	1.61486	0.11599	13.9225	4.62664e-44	7.83801e-42
BATF3	44.764	0.423922	0.104796	4.04522	5.22745e-05	0.000241894
BAX	1191.57	-0.0534447	0.0812238	-0.657993	0.510543	0.635425
BAZ1A	879.383	0.149074	0.0536476	2.77877	0.00545652	0.0154553
BAZ1B	2725.85	-0.171251	0.0548535	-3.12197	0.00179644	0.00579281
BAZ2A	2770.27	0.139522	0.0661651	2.10869	0.0349713	0.0753452
BAZ2B	597.301	-0.186423	0.0899138	-2.07336	0.038139	0.081151
BBC3	318.412	0.202772	0.110316	1.8381	0.0660473	0.128579
BBOX1	26.0442	-2.91052	0.280929	-10.3603	3.75683e-25	1.30588e-23
BBS1	557.824	-0.0623552	0.0626971	-0.994546	0.319957	0.450627
BBS10	307.103	-0.13297	0.0636062	-2.09052	0.0365713	0.0781748
BBS12	168.443	-0.0307212	0.0766428	-0.400836	0.688541	0.787589
BBS2	728.897	-0.0594609	0.0590323	-1.00726	0.31381	0.444335
BBS4	508.595	0.0326286	0.0564817	0.577684	0.563478	0.683443
BBS5	404.842	-0.0168651	0.068078	-0.247733	0.804341	0.87225
BBS7	274.151	-0.0447035	0.0517627	-0.863624	0.387794	0.520401
BBS9	406.447	-0.173805	0.0763795	-2.27555	0.0228729	0.0523487
BBX	1258.63	0.0569936	0.0585091	0.974098	0.330008	0.461172
BCAM	730.175	-0.761298	0.107463	-7.08429	1.39756e-12	1.77106e-11
BCAN	4664.33	-0.733628	0.235021	-3.12155	0.00179903	0.0058
BCAP29	1565.06	-0.12089	0.0858576	-1.40803	0.159121	0.262145
BCAP31	6010.37	-0.05548	0.0700581	-0.791914	0.428411	0.560283
BCAR1	1634.3	-0.457776	0.0806287	-5.67758	1.3661e-08	1.12174e-07
BCAR3	753.783	-0.0488364	0.0874938	-0.55817	0.576728	0.695219
BCAR4	0.504005	-0.528941	0.300627	-1.75946	0.0784994	0.148231
BCAS1	13.392	-0.0277761	0.161546	-0.171939	0.863485	0.913911
BCAS2	556.208	-0.014625	0.0502384	-0.291111	0.770966	0.849335
BCAS3	1253.94	0.317199	0.101366	3.12924	0.00175262	0.00566399
BCAS4	283.912	0.916559	0.113526	8.07358	6.82646e-16	1.15404e-14
BCAT1	390.183	-0.347123	0.145318	-2.38872	0.0169073	0.0405523
BCAT2	439.971	-0.190932	0.0657856	-2.90234	0.00370384	0.0109536
BCCIP	706.386	0.0464985	0.0438443	1.06054	0.288901	0.416815
BCDIN3D	108.351	0.0613537	0.0592252	1.03594	0.30023	0.429618
BCHE	880.279	-0.530198	0.167561	-3.16421	0.00155504	0.00509529
BCKDHA	965.91	-0.111951	0.0623381	-1.79587	0.0725145	0.138918
BCKDHB	263.306	-0.0593568	0.0616655	-0.96256	0.335768	0.467502
BCKDK	1445.88	-0.0975138	0.0569731	-1.71158	0.086975	0.161303
BCL10	308.878	-0.00138561	0.0410458	-0.0337575	0.973071	0.9835
BCL11A	94.5666	0.0957555	0.178813	0.535507	0.592299	0.708102
BCL11B	139.968	1.05606	0.157821	6.6915	2.20896e-11	2.49656e-10
BCL2	803.719	0.139201	0.103579	1.34391	0.178978	0.287817
BCL2A1	924.21	0.179289	0.134299	1.335	0.181876	0.291719
BCL2L1	2058.19	0.220982	0.0687974	3.21207	0.00131782	0.00440936
BCL2L10	2.88686	-1.1752	0.256195	-4.58712	4.49403e-06	2.56478e-05
BCL2L11	450.406	0.397432	0.0831897	4.77742	1.77559e-06	1.07309e-05
BCL2L12	372.705	-0.0261307	0.0623524	-0.419081	0.675157	0.777474
BCL2L13	1871.29	-0.0132954	0.0546183	-0.243424	0.807677	0.874689
BCL2L14	9.01347	1.5818	0.14069	11.2432	2.50174e-29	1.22753e-27
BCL2L15	5.54035	0.121081	0.109248	1.10832	0.267726	0.392814
BCL2L2	864.476	-0.13647	0.0684197	-1.9946	0.0460868	0.095234
BCL3	584.351	0.194842	0.100569	1.93739	0.0526972	0.106359
BCL6	645.046	-0.0365346	0.0743458	-0.491415	0.623133	0.734757
BCL6B	145.788	-0.74865	0.119153	-6.28309	3.31902e-10	3.26905e-09
BCL7A	425.438	-0.146853	0.0824671	-1.78074	0.0749545	0.142844
BCL7B	988.433	-0.0612408	0.0569739	-1.07489	0.282423	0.409599
BCL7C	796.858	-0.107893	0.0877764	-1.22918	0.219004	0.336771
BCL9	901.912	-0.288491	0.0617458	-4.67224	2.97937e-06	1.73795e-05
BCL9L	1520.34	-0.244835	0.0889523	-2.75243	0.00591553	0.0165363
BCLAF1	2245.31	0.00994165	0.0355513	0.279643	0.779752	0.855616
BCO2	18.2468	-0.152632	0.124744	-1.22356	0.221119	0.339277
BCOR	1109.28	0.0732422	0.0683047	1.07229	0.283592	0.410886
BCORL1	503.147	-0.215141	0.0734636	-2.92854	0.00340556	0.0101743
BCR	1241.37	-0.346314	0.080349	-4.31013	1.6316e-05	8.42715e-05
BCS1L	462.163	-0.141266	0.0503131	-2.80773	0.00498925	0.0142598
BCYRN1	0.189785	-0.0334125	0.34182	-0.0977487	0.922132	0.951853
BDH1	445.677	-0.140574	0.108698	-1.29325	0.195924	0.308926
BDH2	516.394	-0.0559435	0.0677895	-0.825253	0.409228	0.542096
BDKRB1	11.9146	-1.07409	0.168346	-6.38025	1.76798e-10	1.80889e-09
BDKRB2	87.3655	-1.57139	0.154909	-10.1439	3.52618e-24	1.14647e-22
BDNF	63.5124	-0.699943	0.178113	-3.92977	8.50277e-05	0.000376565
BDP1	797.067	0.0661843	0.0694773	0.952603	0.340791	0.472737
BECN1	1653.53	-0.0336518	0.0413518	-0.813793	0.415764	0.548287
BEGAIN	90.9703	-0.208613	0.179807	-1.1602	0.245966	0.367863
BEND2	0.232862	0.0381051	0.454168	0.0839009	0.933135	0.959915
BEND3	149.85	-0.133297	0.0695602	-1.91628	0.0553296	0.110728
BEND4	9.50387	1.13575	0.228214	4.9767	6.46786e-07	4.22116e-06
BEND5	54.6457	0.02135	0.117334	0.18196	0.855614	0.907849
BEND6	39.8863	-0.832961	0.12355	-6.74192	1.56312e-11	1.78544e-10
BEND7	95.1244	0.0954678	0.12646	0.754925	0.450294	0.580692
BEST1	1004.69	0.132852	0.101345	1.3109	0.189892	0.301393
BEST2	0.740949	-0.933204	0.245139	-3.80683	0.000140759	0.000593342
BEST3	2.11902	-0.790067	0.268663	-2.94074	0.00327428	0.00983971
BEST4	5.02467	-0.167387	0.122553	-1.36584	0.171988	0.278946
BET1	512.561	-0.0144994	0.076024	-0.190721	0.848744	0.903478
BET1L	1495.28	-0.0884761	0.0733939	-1.2055	0.228012	0.347634
BEX1	52.1241	-1.63749	0.24567	-6.66539	2.63956e-11	2.95007e-10
BEX2	114.8	0.108331	0.131977	0.820828	0.411744	0.54428
BEX4	693.08	-0.0142641	0.111692	-0.12771	0.898378	0.938072
BEX5	13.3891	0.0917673	0.167468	0.547968	0.583714	0.701276
BFAR	2187.02	-0.0267658	0.0562427	-0.475898	0.634147	0.743911
BFSP1	181.717	-0.266434	0.131067	-2.0328	0.0420727	0.088143
BFSP2	16.09	1.08263	0.208299	5.19751	2.01971e-07	1.40049e-06
BGLAP	29.2077	-0.129414	0.12155	-1.0647	0.287012	0.414499
BGN	6857.11	-0.317134	0.124062	-2.55625	0.0105806	0.0271759
BHLHA15	7.99967	1.30029	0.183165	7.099	1.2566e-12	1.59997e-11
BHLHB9	84.4078	-0.257359	0.0846468	-3.04039	0.00236272	0.00737215
BHLHE22	61.6653	-1.00345	0.184193	-5.44784	5.09854e-08	3.86874e-07
BHLHE23	0.0332133	-0.0831654	1.51115	-0.0550344	0.956111	NA
BHLHE40	3973.6	-0.176254	0.0736236	-2.39399	0.016666	0.0400653
BHLHE41	1458.52	0.29654	0.127525	2.32534	0.020054	0.0468092
BHMT	3.46248	-0.954468	0.257486	-3.70687	0.000209837	0.000850445
BHMT2	39.2015	-0.426761	0.188548	-2.26341	0.0236103	0.0538146
BICC1	67.9364	-0.893247	0.128061	-6.97518	3.05487e-12	3.74164e-11
BICD1	372.175	-0.188303	0.0740005	-2.54462	0.0109395	0.0279595
BICD2	1137.97	-0.300378	0.0582845	-5.15366	2.55456e-07	1.75099e-06
BID	394.217	-0.0587798	0.0801844	-0.733057	0.463523	0.592247
BIK	27.2718	0.476227	0.172972	2.7532	0.00590156	0.0165052
BIN1	747.143	0.126869	0.105723	1.20001	0.230134	0.350305
BIN2	243.794	1.49841	0.126538	11.8415	2.38119e-32	1.58359e-30
BIN3	1155.13	-0.0752632	0.0818115	-0.919958	0.357594	0.48909
BIRC2	1028.16	-0.127572	0.100262	-1.27238	0.203237	0.317563
BIRC3	466.325	1.06012	0.150985	7.02138	2.19683e-12	2.72808e-11
BIRC5	463.626	-0.156631	0.099597	-1.57265	0.1158	0.203219
BIRC6	1925.56	0.0405316	0.0717879	0.564603	0.572344	0.691354
BIRC7	1816.31	0.357048	0.180614	1.97685	0.048058	0.0987168
BIRC8	0.0832357	-0.0977314	0.756139	-0.12925	0.897159	NA
BIVM	444.359	-0.195952	0.0856091	-2.28891	0.0220846	0.0507248
BLCAP	1400.2	0.0835807	0.0763653	1.09448	0.273743	0.399711
BLID	0.518199	-1.00939	0.319142	-3.16282	0.00156249	0.00511424
BLK	64.2295	1.3287	0.224443	5.91999	3.21962e-09	2.84863e-08
BLM	303.288	0.0406269	0.0733812	0.553642	0.579824	0.697853
BLMH	930.406	-0.17648	0.055613	-3.17335	0.0015069	0.00496055
BLNK	115.052	1.04306	0.141621	7.36511	1.77007e-13	2.41215e-12
BLOC1S1	1004.26	0.09637	0.0963286	1.00043	0.317102	0.447828
BLOC1S2	562.256	0.18774	0.0764777	2.45483	0.0140952	0.0346597
BLOC1S3	365.3	0.0201933	0.10101	0.199914	0.841548	0.89841
BLVRA	940.563	0.0542541	0.0715296	0.758485	0.448161	0.578776
BLVRB	1005.73	0.199079	0.0868324	2.29268	0.0218664	0.0503185
BLZF1	501.04	-0.0372587	0.0517908	-0.719408	0.471889	0.599983
BMF	635.858	0.118112	0.0981756	1.20307	0.22895	0.348728
BMI1	1037.73	0.141385	0.0845239	1.67273	0.0943811	0.172238
BMP1	1343.92	-0.561399	0.0753137	-7.45413	9.04596e-14	1.27595e-12
BMP10	0.200255	0.310951	0.37463	0.830021	0.406527	0.539421
BMP15	0.0449063	-0.0318618	1.22991	-0.0259058	0.979332	NA
BMP2	84.4133	-1.36813	0.15233	-8.98135	2.67466e-19	6.02886e-18
BMP2K	441.155	0.202903	0.0589754	3.44047	0.000580704	0.0021289
BMP3	2.07167	-0.626865	0.290424	-2.15845	0.0308929	0.0678944
BMP4	88.3323	-0.673713	0.142488	-4.72821	2.26505e-06	1.34268e-05
BMP5	3.27684	-1.70178	0.336756	-5.05346	4.33872e-07	2.88901e-06
BMP6	105.854	-0.363681	0.129138	-2.81623	0.00485914	0.0139374
BMP7	402.648	-0.226369	0.237611	-0.952687	0.340749	0.472737
BMP8A	141.598	-0.642485	0.118525	-5.42065	5.93825e-08	4.45341e-07
BMP8B	543.555	-0.465204	0.164253	-2.83225	0.00462221	0.0133267
BMPER	30.5726	-1.29175	0.180381	-7.16126	7.99384e-13	1.04257e-11
BMPR1A	478.189	-0.214541	0.0585959	-3.66136	0.000250876	0.00100064
BMPR1B	166.625	-0.353643	0.185352	-1.90795	0.0563977	0.11246
BMPR2	2232.73	-0.0854182	0.077963	-1.09562	0.273243	0.399126
BMS1	1146.82	-0.0627687	0.0374468	-1.67621	0.0936973	0.171314
BMS1P4	14.3404	0.100419	0.110877	0.905674	0.365109	0.497034
BMX	102.066	-0.399479	0.203998	-1.95825	0.0502008	0.102244
BNC1	53.0856	-2.94355	0.233083	-12.6288	1.46529e-36	1.32485e-34
BNC2	910.483	-0.0198438	0.0884156	-0.224437	0.822417	0.885365
BNIP1	150.375	0.0555963	0.0592588	0.938195	0.348144	0.480041
BNIP2	870.553	0.0734334	0.0445732	1.64748	0.0994597	0.179895
BNIP3	656.512	-0.218903	0.0921724	-2.37492	0.0175525	0.0418232
BNIP3L	1894	-0.0884356	0.0582682	-1.51773	0.129082	0.221983
BNIPL	41.7931	-2.89012	0.20467	-14.1209	2.82476e-45	5.22548e-43
BOC	525.133	-0.198771	0.135981	-1.46175	0.143809	0.241989
BOD1	653.939	-0.0904398	0.0664726	-1.36056	0.173654	0.281212
BOK	396.03	-0.259256	0.145001	-1.78796	0.0737818	0.140826
BOLA1	211.076	0.046648	0.104848	0.444911	0.656384	0.762775
BOLA2	1342.77	-0.0898096	0.0685654	-1.30984	0.190251	0.301704
BOLA3	338.187	-0.0319663	0.066284	-0.482262	0.62962	0.740507
BOLL	0.391739	-0.206477	0.27285	-0.756743	0.449204	0.579611
BPESC1	0.0870067	-0.216788	0.724734	-0.299127	0.764843	NA
BPGM	428.16	0.100141	0.0594448	1.68461	0.0920637	0.168929
BPHL	456.409	-0.0992997	0.0754508	-1.31608	0.188146	0.299389
BPI	7.94595	-0.104777	0.212403	-0.493293	0.621806	0.733999
BPNT1	635.483	-0.137448	0.0575533	-2.38818	0.0169321	0.0405997
BPTF	1970.74	-0.0183678	0.072966	-0.251731	0.801249	0.870074
BPY2	0.0330912	-0.0758344	2.58296	-0.0293595	0.976578	NA
BRAF	236.76	-0.00796334	0.0609831	-0.130583	0.896105	0.936245
BRAP	540.129	-0.0367902	0.063326	-0.580965	0.561264	0.681426
BRCA1	523.365	0.0919492	0.0765699	1.20085	0.229808	0.349908
BRCA2	190.529	0.0250306	0.084473	0.296315	0.76699	0.846849
BRCC3	320.426	0.0281371	0.0514945	0.54641	0.584784	0.702247
BRD1	945.483	-0.060984	0.049798	-1.22463	0.220715	0.338885
BRD2	5279.82	-0.0114403	0.04121	-0.27761	0.781311	0.856312
BRD3	690.953	-0.219714	0.0598114	-3.67345	0.000239295	0.000958727
BRD4	2381.03	-0.10966	0.0692133	-1.58438	0.113107	0.199622
BRD7	991.802	-0.0310259	0.0360821	-0.859869	0.389861	0.522607
BRD8	1015.58	0.0350205	0.0512324	0.683561	0.494252	0.620718
BRD9	997.149	-0.111315	0.0690285	-1.61259	0.106833	0.190527
BRDT	0.179673	0.0343388	0.381321	0.0900521	0.928246	0.956414
BRF1	748.822	-0.0832841	0.0567377	-1.46788	0.142137	0.239861
BRF2	358.42	-0.138388	0.0706482	-1.95883	0.0501331	0.102171
BRI3	2772.16	0.0505167	0.0794076	0.636169	0.524666	0.648281
BRI3BP	118.143	-0.0286733	0.0740549	-0.387189	0.698616	0.795439
BRIP1	163.01	0.0256029	0.0817751	0.313089	0.754213	0.837751
BRIX1	690.451	-0.0974091	0.0669897	-1.45409	0.145921	0.244835
BRMS1	1099.64	0.0339633	0.0738446	0.45993	0.645567	0.753919
BRMS1L	159.176	-0.113815	0.0531466	-2.14152	0.0322318	0.0703779
BRPF1	677.649	-0.067356	0.0537911	-1.25218	0.210505	0.326771
BRPF3	995.09	-0.125361	0.0566195	-2.21409	0.0268226	0.0601229
BRS3	0.169551	0.0141683	0.425993	0.0332594	0.973468	0.983664
BRSK1	295.649	-0.585866	0.138498	-4.23013	2.3356e-05	0.0001167
BRSK2	92.4601	-0.371852	0.17759	-2.09388	0.036271	0.0776671
BRWD1	896.48	-0.0291013	0.0500085	-0.581927	0.560616	0.680998
BRWD3	262.016	-0.0501483	0.0648314	-0.773519	0.439215	0.570381
BSCL2	1880.51	-0.100929	0.0848636	-1.18931	0.234318	0.35533
BSDC1	1342.97	-0.0536552	0.0447301	-1.19953	0.230321	0.350425
BSG	20269.7	-0.344527	0.0938105	-3.67259	0.000240109	0.000961512
BSN	65.7443	-0.244579	0.114584	-2.1345	0.0328016	0.071397
BSND	0.251568	-0.46009	0.468104	-0.982881	0.325666	0.456676
BSPH1	0.111672	-0.200256	1.25876	-0.15909	0.873598	NA
BSPRY	28.385	-0.467572	0.186882	-2.50196	0.0123509	0.031115
BST1	186.161	-0.107097	0.107767	-0.993783	0.320329	0.45096
BST2	3105.83	0.947195	0.117774	8.04251	8.80193e-16	1.47715e-14
BSX	0.0553726	-0.106937	1.1453	-0.0933695	0.92561	NA
BTAF1	719.335	0.142224	0.0634993	2.23978	0.0251053	0.0568037
BTBD1	1555.56	-0.053216	0.0585317	-0.909182	0.363254	0.495064
BTBD10	539.695	0.00652362	0.0692855	0.0941557	0.924985	0.953849
BTBD11	54.974	-0.878582	0.165945	-5.29442	1.19396e-07	8.56309e-07
BTBD16	2.54348	-1.35477	0.245161	-5.52604	3.27535e-08	2.54041e-07
BTBD17	0.442302	-0.287556	0.397718	-0.723015	0.46967	0.597884
BTBD18	2.29827	-0.0591743	0.131948	-0.448467	0.653816	0.760682
BTBD19	71.1731	-0.308396	0.0957166	-3.22197	0.00127312	0.00426601
BTBD2	2246.46	-0.174959	0.074438	-2.3504	0.0187533	0.0442674
BTBD3	1387.72	-0.238544	0.0785325	-3.03752	0.00238533	0.00743693
BTBD6	1068.25	-0.0610854	0.0643398	-0.949419	0.342408	0.474121
BTBD7	610.601	-0.166523	0.0404598	-4.11576	3.85913e-05	0.000183809
BTBD8	5.01228	0.0404363	0.146391	0.27622	0.782379	0.856863
BTBD9	712.894	-0.144169	0.0608434	-2.36951	0.0178118	0.0423557
BTC	5.70685	-0.80752	0.275776	-2.92817	0.00340958	0.0101845
BTD	519.747	-0.109716	0.0594517	-1.84547	0.064969	0.126811
BTF3	7310.95	-0.0588702	0.05957	-0.988254	0.323028	0.453887
BTF3L4	674.779	-0.0726791	0.0577062	-1.25947	0.207862	0.323689
BTG1	3107.45	0.179494	0.0737105	2.43513	0.0148865	0.0363225
BTG2	811.878	0.655302	0.112324	5.83404	5.41028e-09	4.64637e-08
BTG3	579.318	-0.127837	0.0826093	-1.54748	0.121746	0.211711
BTG4	0.958758	-0.76852	0.270274	-2.84348	0.00446236	0.0129098
BTK	236.873	1.18447	0.117775	10.0571	8.55027e-24	2.71416e-22
BTLA	42.5811	1.63653	0.167451	9.77322	1.46716e-22	4.16446e-21
BTN1A1	5.09905	0.817103	0.157641	5.18331	2.17982e-07	1.50373e-06
BTN2A1	821.864	0.0515429	0.0486095	1.06035	0.288987	0.416865
BTN2A2	1042.11	0.388623	0.0776498	5.00481	5.59159e-07	3.6746e-06
BTN3A1	1160.02	0.973625	0.0752846	12.9326	2.94678e-38	3.24832e-36
BTN3A2	2166.06	0.771728	0.078653	9.81181	1.00154e-22	2.89906e-21
BTN3A3	874.655	1.05237	0.0828725	12.6987	6.01574e-37	5.66183e-35
BTNL2	0.522613	0.10755	0.310949	0.345877	0.729435	0.819972
BTNL3	1.08502	1.24068	0.267598	4.63637	3.54582e-06	2.05349e-05
BTNL8	4.92084	0.481713	0.194145	2.4812	0.0130941	0.0326524
BTNL9	63.6839	-0.163961	0.129401	-1.26707	0.20513	0.320023
BTRC	475.743	0.0458596	0.0401303	1.14277	0.253135	0.375861
BUB1	587.99	-0.0330047	0.0750792	-0.439598	0.660228	0.765582
BUB1B	496.828	-0.142324	0.0781832	-1.82039	0.0686991	0.132842
BUB3	1334.12	0.117547	0.0487212	2.41264	0.0158375	0.0383118
BUD13	325.819	-0.0320615	0.045831	-0.699561	0.484202	0.61112
BUD31	1295.24	-0.149312	0.0644827	-2.31553	0.0205838	0.0478652
BVES	234.816	-0.203841	0.12871	-1.58372	0.113257	0.199798
BYSL	832.752	-0.238218	0.0682422	-3.49077	0.00048163	0.00180013
BZW1	2723.05	-0.230236	0.05251	-4.38462	1.1619e-05	6.1613e-05
BZW2	2405.83	-0.511591	0.0758426	-6.74543	1.52578e-11	1.74403e-10
C10orf105	7.41827	0.23509	0.167336	1.4049	0.160051	0.263277
C10orf120	0.0206138	-0.0483871	2.00686	-0.0241109	0.980764	NA
C10orf53	0.0301771	-0.0685179	1.66574	-0.0411336	0.967189	NA
C10orf55	7.10728	-0.531631	0.131097	-4.05526	5.00785e-05	0.000232803
C10orf62	1.61307	0.0345965	0.161608	0.214077	0.830487	0.890879
C10orf67	5.27019	-0.484315	0.154538	-3.13396	0.00172466	0.00558485
C10orf71	0.266762	-0.412426	0.472731	-0.872431	0.382973	0.515092
C10orf82	3.75681	-0.474419	0.189504	-2.50348	0.012298	0.0309983
C10orf88	167.769	0.00762679	0.0415808	0.183421	0.854468	0.906992
C10orf90	436.498	-0.0300598	0.147022	-0.204458	0.837995	0.896067
C10orf95	3.71925	-0.166466	0.111684	-1.4905	0.136092	0.231805
C10orf99	32.0425	-6.50454	0.500143	-13.0053	1.14082e-38	1.31145e-36
C11orf1	210.009	0.0225669	0.0860204	0.262344	0.793057	0.86444
C11orf16	0.809593	-0.147084	0.199985	-0.735474	0.462051	0.590788
C11orf21	21.532	1.31382	0.144308	9.10428	8.68409e-20	2.01968e-18
C11orf24	2226.71	-0.155307	0.0761956	-2.03826	0.0415235	0.0872656
C11orf40	0.0160916	-0.0575415	3.13166	-0.0183741	0.98534	NA
C11orf42	1.08372	-0.378194	0.173178	-2.18385	0.0289731	0.0642454
C11orf45	28.0136	0.245793	0.10502	2.34043	0.0192616	0.0452167
C11orf49	448.747	-0.0899466	0.0623194	-1.44332	0.148932	0.2489
C11orf52	12.6097	-0.285101	0.15227	-1.87233	0.0611607	0.120362
C11orf53	0.287151	0.140757	0.393789	0.357443	0.72076	0.812876
C11orf54	268.013	-0.0307368	0.0714143	-0.430402	0.666903	0.770893
C11orf58	2487.9	0.0158128	0.0439045	0.360164	0.718725	0.811445
C11orf65	6.42538	0.19353	0.0930731	2.07933	0.0375872	0.0800698
C11orf68	789.48	0.0149702	0.0797678	0.187673	0.851133	0.904536
C11orf71	157.57	0.130129	0.0861553	1.5104	0.130941	0.224617
C11orf80	187.053	0.0704132	0.0853464	0.825029	0.409355	0.542147
C11orf86	0.461203	-0.400902	0.323309	-1.24	0.214977	0.331933
C11orf87	1.19388	-0.730479	0.226672	-3.22263	0.00127019	0.00426151
C11orf94	0.250746	-0.14502	0.259222	-0.559444	0.575859	0.694594
C12orf29	256.125	-0.116687	0.0648344	-1.79977	0.0718973	0.137899
C12orf4	359.743	0.149135	0.0483522	3.08434	0.00204003	0.00646432
C12orf40	0.265968	0.641302	0.352984	1.8168	0.069247	0.133725
C12orf42	2.44902	1.0553	0.163937	6.43723	1.21671e-10	1.26907e-09
C12orf43	248.913	-0.00887076	0.0483314	-0.18354	0.854374	0.90697
C12orf45	187.377	0.0957437	0.0760781	1.25849	0.208214	0.324049
C12orf50	1.88337	-0.0377382	0.259636	-0.14535	0.884434	0.928997
C12orf54	0.502515	-1.20707	0.363217	-3.32327	0.000889674	0.00311536
C12orf56	5.58678	-0.612635	0.263909	-2.32139	0.020266	0.0472422
C12orf57	1660.28	0.0014499	0.0795456	0.0182273	0.985458	0.990937
C12orf60	28.5201	-0.112376	0.0948008	-1.1854	0.235861	0.357198
C12orf65	260.389	0.245938	0.0481778	5.10481	3.31128e-07	2.24586e-06
C12orf66	135.326	-0.126005	0.0671312	-1.877	0.0605187	0.119259
C12orf71	0.788115	0.309657	0.164643	1.88078	0.0600016	0.118428
C12orf73	128.096	0.0321709	0.0646551	0.497577	0.618782	0.731288
C12orf75	160.457	-0.236266	0.123898	-1.90695	0.0565276	0.11267
C12orf76	255.466	0.158654	0.0866562	1.83084	0.0671237	0.130234
C12orf77	0.545208	0.734354	0.40489	1.81371	0.069722	0.134416
C14orf119	929.346	-0.00564596	0.054108	-0.104346	0.916895	0.948961
C14orf132	332.209	-0.61932	0.15078	-4.10744	4.00077e-05	0.000189712
C14orf177	0.0404175	0.00659627	1.27839	0.00515981	0.995883	NA
C14orf178	1.17903	-0.139406	0.121852	-1.14405	0.252601	0.375292
C14orf180	1.62115	-0.42981	0.402825	-1.06699	0.285976	0.413485
C14orf28	62.0619	0.0293307	0.0790154	0.371202	0.710487	0.804466
C14orf39	5.99081	-0.283522	0.24464	-1.15893	0.246483	0.368465
C14orf93	210.213	-0.0140903	0.0569531	-0.247402	0.804597	0.872352
C15orf32	0.251189	-0.507713	0.459	-1.10613	0.268671	0.393985
C15orf39	1315.34	-0.0639814	0.0798384	-0.801386	0.422908	0.554935
C15orf40	227.138	0.0619218	0.0567419	1.09129	0.275146	0.401337
C15orf48	89.4505	0.596825	0.155861	3.8292	0.000128559	0.000546351
C15orf54	2.58535	-0.310071	0.173946	-1.78257	0.0746559	0.142342
C15orf56	6.10843	-0.455289	0.205521	-2.2153	0.0267398	0.0599624
C15orf61	128.478	-0.0454856	0.0731356	-0.621936	0.533984	0.656424
C15orf62	30.7774	-0.429369	0.118277	-3.63019	0.000283215	0.00111526
C16orf46	29.2645	-0.293915	0.0805732	-3.6478	0.00026449	0.00104768
C16orf54	96.5759	1.62877	0.144551	11.2678	1.89268e-29	9.4306e-28
C16orf70	460.765	-0.185615	0.0512065	-3.62484	0.00028914	0.00113526
C16orf71	9.28873	-0.074896	0.0890493	-0.841062	0.400313	0.53289
C16orf72	910.809	-0.119131	0.0318584	-3.7394	0.000184459	0.00075751
C16orf74	76.3863	-0.0830286	0.145828	-0.569361	0.569111	0.688385
C16orf78	0.0429994	0.00843735	1.23207	0.00684811	0.994536	NA
C16orf86	64.1126	0.0607512	0.0794756	0.7644	0.444629	0.575739
C16orf87	101.219	0.00313754	0.0645621	0.0485972	0.96124	0.977333
C16orf89	71.296	-0.028303	0.195754	-0.144585	0.885039	0.929389
C16orf90	0.251775	0.010653	0.319689	0.033323	0.973417	0.983664
C16orf91	207.142	-0.221511	0.055805	-3.96937	7.20633e-05	0.000324235
C16orf92	0.102112	-0.211264	0.580568	-0.363892	0.715939	NA
C17orf100	51.1902	-0.143847	0.0834322	-1.72412	0.0846862	0.157857
C17orf102	0.167279	-0.337519	0.415616	-0.812092	0.416739	0.549439
C17orf107	53.0705	-0.393996	0.116083	-3.39407	0.000688611	0.00247875
C17orf49	1106.76	0.165926	0.0613005	2.70676	0.00679437	0.0186252
C17orf50	0.51056	-0.423334	0.254958	-1.66041	0.0968327	0.175934
C17orf58	209.137	-0.0810353	0.0744809	-1.088	0.276594	0.403107
C17orf64	1.30411	0.109331	0.180493	0.605734	0.544692	0.666535
C17orf67	20.6239	-0.214764	0.119395	-1.79877	0.0720555	0.138154
C17orf75	199.839	0.111044	0.0650227	1.70778	0.0876774	0.162436
C17orf77	4.88178	0.169027	0.416773	0.405561	0.685065	0.785232
C17orf78	0.418897	0.00187123	0.220337	0.0084926	0.993224	0.995575
C17orf80	513.979	-0.000838126	0.0458799	-0.0182678	0.985425	0.990937
C17orf97	90.2319	-0.207353	0.0995297	-2.08333	0.037221	0.0794063
C17orf98	0.273827	0.0656406	0.263058	0.249529	0.802952	0.871166
C17orf99	1.13942	0.488493	0.224439	2.17651	0.0295173	0.0652094
C18orf21	242.443	0.0742395	0.060981	1.21742	0.223445	0.341999
C18orf25	555.167	0.0790014	0.0377412	2.09324	0.0363277	0.0777575
C18orf32	601.689	0.114753	0.087041	1.31838	0.187375	0.298487
C18orf54	140.111	-0.171041	0.0869331	-1.9675	0.0491256	0.100525
C19orf12	1016.81	0.275996	0.0513437	5.37547	7.63832e-08	5.6313e-07
C19orf18	4.37876	-0.337302	0.13063	-2.58212	0.00981943	0.0254729
C19orf25	424.943	-0.00059443	0.0912354	-0.00651535	0.994802	0.996597
C19orf33	35.2634	-2.84109	0.316257	-8.98349	2.62312e-19	5.92929e-18
C19orf38	39.9425	1.37437	0.112645	12.2009	3.07455e-34	2.42558e-32
C19orf44	204.326	-0.130173	0.0580768	-2.2414	0.0250003	0.0566059
C19orf47	351.074	-0.0840242	0.063981	-1.31327	0.189093	0.300569
C19orf48	994.035	-0.261819	0.100527	-2.60446	0.00920202	0.0241279
C19orf53	1552.18	-0.0917663	0.0812554	-1.12936	0.258748	0.38243
C19orf54	377.228	0.00944986	0.0603872	0.156488	0.875649	0.92274
C19orf71	49.6503	0.04034	0.118585	0.340177	0.733723	0.823
C19orf73	15.8469	-0.113721	0.0962277	-1.18179	0.237289	0.35882
C1D	176.858	0.0491467	0.0626725	0.784183	0.432932	0.564316
C1GALT1	456.307	0.0741677	0.0811057	0.914457	0.360477	0.492112
C1GALT1C1	342.881	0.152501	0.06117	2.49307	0.0126642	0.0317276
C1orf100	0.186775	-0.0334125	0.300153	-0.111318	0.911364	0.945362
C1orf105	0.39461	-0.663458	0.308236	-2.15243	0.0313634	0.0687593
C1orf109	291.297	-0.153641	0.0639357	-2.40305	0.016259	0.0392311
C1orf112	253.357	-0.132896	0.0553727	-2.40004	0.0163935	0.0395083
C1orf115	254.077	-0.0072711	0.146469	-0.0496427	0.960407	0.976918
C1orf116	88.0714	-1.70919	0.211028	-8.09934	5.52573e-16	9.42066e-15
C1orf122	654.02	-0.144953	0.079727	-1.81811	0.0690469	0.133428
C1orf127	13.3824	0.534262	0.126744	4.21529	2.49461e-05	0.000123723
C1orf131	227.459	-0.145188	0.0510566	-2.84368	0.00445962	0.0129042
C1orf141	0.0761062	-0.154518	0.889555	-0.173703	0.862099	NA
C1orf146	0.072827	0.162351	0.696445	0.233114	0.815673	NA
C1orf158	0.262924	-0.599275	0.606104	-0.988733	0.322794	0.453755
C1orf159	199.646	-0.114315	0.0796747	-1.43477	0.151353	0.252161
C1orf162	257.11	1.08036	0.114792	9.41148	4.89204e-21	1.2438e-19
C1orf174	366.235	-0.0343904	0.0397027	-0.866197	0.386382	0.518851
C1orf185	0.0870358	-0.174647	0.712512	-0.245115	0.806367	NA
C1orf189	0.555523	-0.484036	0.214378	-2.25786	0.0239544	0.0544454
C1orf194	1.26182	-0.260084	0.197479	-1.31703	0.18783	0.299094
C1orf198	1548.21	-0.158736	0.0799393	-1.98571	0.0470654	0.0969872
C1orf21	1642.74	-0.12539	0.0892593	-1.40478	0.160086	0.263277
C1orf210	5.04661	-1.63312	0.28497	-5.73084	9.99371e-09	8.31208e-08
C1orf216	823.771	-0.0699428	0.0802924	-0.871102	0.383699	0.515894
C1orf220	14.7742	0.232681	0.105159	2.21266	0.0269211	0.0603018
C1orf226	99.4949	-0.382345	0.164226	-2.32816	0.0199038	0.0465125
C1orf229	10.5967	-0.282589	0.147144	-1.92048	0.0547967	0.10988
C1orf35	336.821	-0.0321393	0.0679602	-0.472913	0.636275	0.745665
C1orf43	4947.81	-0.0528806	0.0565163	-0.935671	0.349443	0.481377
C1orf50	110.3	-0.0163831	0.0592628	-0.276448	0.782204	0.85673
C1orf52	282.211	-0.0229073	0.0598723	-0.382602	0.702015	0.798206
C1orf53	32.2827	-0.335715	0.107415	-3.1254	0.00177565	0.00573151
C1orf54	113.082	0.524295	0.0784811	6.68053	2.38081e-11	2.68002e-10
C1orf56	184.65	-0.0120085	0.0952741	-0.126042	0.899699	0.938598
C1orf68	15.9137	-5.02527	0.644753	-7.79411	6.48631e-15	1.01547e-13
C1orf74	114.195	-0.181058	0.0592011	-3.05836	0.00222551	0.0069833
C1orf87	0.534092	-0.0735133	0.368961	-0.199244	0.842072	0.89868
C1orf94	0.371155	-1.03419	0.402772	-2.56768	0.0102382	0.0264102
C1QA	4722.59	1.73009	0.12201	14.1799	1.21983e-45	2.39414e-43
C1QB	5089.21	1.78939	0.122728	14.58	3.76291e-48	9.31697e-46
C1QBP	1823.13	-0.168173	0.0574445	-2.92758	0.00341612	0.0102002
C1QC	4218.34	1.66776	0.117834	14.1535	1.77794e-45	3.40646e-43
C1QL1	91.4896	-0.831554	0.175454	-4.73944	2.14308e-06	1.27744e-05
C1QL2	0.609996	-1.08539	0.321566	-3.37532	0.000737311	0.00263294
C1QL3	11.2188	-0.323891	0.12536	-2.5837	0.0097747	0.0253896
C1QL4	38.7678	-0.681672	0.205258	-3.32104	0.000896814	0.00313563
C1QTNF1	1122.21	-0.208283	0.126536	-1.64604	0.099755	0.180287
C1QTNF2	21.8687	0.0485053	0.114997	0.421794	0.673175	0.77562
C1QTNF3	1173.68	-1.30652	0.2079	-6.28437	3.29182e-10	3.25022e-09
C1QTNF4	11.9609	-0.207518	0.153959	-1.34788	0.177698	0.286187
C1QTNF6	829.355	-0.237815	0.101591	-2.34091	0.0192368	0.0451702
C1QTNF7	9.94559	-0.641473	0.145569	-4.40664	1.04985e-05	5.61527e-05
C1QTNF8	0.111099	-0.000603474	0.673916	-0.000895473	0.999286	NA
C1QTNF9	2.55122	0.0984436	0.141703	0.694716	0.487233	0.614155
C1QTNF9B	3.72526	-0.320903	0.129387	-2.48018	0.0131315	0.0327302
C1R	3420.11	0.544124	0.123896	4.39177	1.1243e-05	5.9856e-05
C1RL	390.735	0.362595	0.104479	3.4705	0.000519481	0.00192594
C1S	4518.04	0.715897	0.125459	5.70624	1.15498e-08	9.57661e-08
C2	2390.17	1.48544	0.124228	11.9574	5.94069e-33	4.21187e-31
C20orf141	0.686615	0.429213	0.226553	1.89453	0.0581544	0.115363
C20orf144	0.860964	-0.226691	0.171594	-1.32109	0.186471	0.297459
C20orf173	0.149797	0.18997	0.417321	0.455213	0.648956	0.756584
C20orf194	710.221	0.0530877	0.0533812	0.994502	0.319978	0.450627
C20orf197	2.70765	0.120568	0.13513	0.892238	0.372266	0.504441
C20orf202	3.36188	-0.284913	0.127199	-2.2399	0.0250971	0.0568012
C20orf27	1140.6	-0.0531956	0.0898739	-0.591891	0.553923	0.674907
C20orf85	0.390449	-0.236285	0.716032	-0.329992	0.741406	0.828107
C20orf96	199.967	-0.24838	0.0844172	-2.94229	0.00325791	0.00979715
C21orf58	97.7958	-0.0629461	0.0790465	-0.796317	0.425848	0.557747
C21orf62	2.7311	0.00328293	0.159825	0.0205407	0.983612	0.989886
C21orf91	704.454	0.336063	0.110654	3.03706	0.00238895	0.00744678
C22orf15	3.19537	0.297823	0.140428	2.12082	0.0339368	0.0735694
C22orf23	53.9608	-0.462983	0.103203	-4.48614	7.25253e-06	3.98914e-05
C22orf24	1.94808	0.0353735	0.120688	0.293099	0.769446	0.848415
C22orf31	2.55199	-0.138632	0.209886	-0.660511	0.508926	0.633977
C22orf39	499.454	-0.00173028	0.0523174	-0.0330728	0.973616	0.983664
C22orf42	0.120032	-0.073837	0.5014	-0.147262	0.882925	NA
C22orf46	542.724	0.0197658	0.0768542	0.257186	0.797036	0.867015
C2CD2	418.838	0.0323904	0.115299	0.280925	0.778768	0.854945
C2CD2L	402.557	0.0604157	0.059959	1.00762	0.313638	0.444143
C2CD3	651.184	-0.0448184	0.068957	-0.649947	0.515727	0.640193
C2CD4A	2.32435	-0.953577	0.205673	-4.63638	3.54569e-06	2.05349e-05
C2CD4B	7.34995	-0.234732	0.167188	-1.404	0.16032	0.26358
C2CD4C	20.3572	0.0691606	0.164953	0.419275	0.675015	0.777366
C2CD4D	24.0318	-0.209294	0.121296	-1.72548	0.0844403	0.157454
C2orf15	9.53664	0.122197	0.0807778	1.51275	0.130343	0.223773
C2orf16	45.6574	-0.44957	0.0861719	-5.21714	1.8171e-07	1.27104e-06
C2orf27A	21.7724	-0.183375	0.105883	-1.73186	0.0832982	0.155631
C2orf42	213.283	0.0173225	0.0437765	0.395703	0.692324	0.790344
C2orf49	120.729	-0.0359586	0.0516524	-0.696164	0.486326	0.613302
C2orf50	2.7281	-0.377142	0.140816	-2.67827	0.00740032	0.0200136
C2orf66	5.1214	-0.710848	0.169787	-4.1867	2.83034e-05	0.000138919
C2orf68	524.448	0.0434275	0.0671293	0.646922	0.517682	0.641979
C2orf69	331.011	-0.00605277	0.0546749	-0.110705	0.91185	0.945514
C2orf72	61.8841	-0.094725	0.202835	-0.467006	0.640496	0.749443
C2orf73	1.85063	-0.0485575	0.137731	-0.352553	0.724423	0.815648
C2orf74	186.472	0.0450039	0.0881621	0.510467	0.609724	0.723558
C2orf76	64.2974	-0.162328	0.0595657	-2.72519	0.0064265	0.0177742
C2orf78	0.20767	-0.225702	0.392568	-0.574937	0.565334	0.685333
C2orf80	0.683561	-0.613852	0.319054	-1.92397	0.0543577	0.109149
C2orf81	107.365	-0.0686905	0.0963303	-0.713073	0.475801	0.603003
C2orf83	0.115556	-0.132465	0.577319	-0.229449	0.81852	NA
C2orf88	310.59	-0.107216	0.120328	-0.891032	0.372912	0.505147
C3	4590.19	0.76486	0.190571	4.01351	5.98213e-05	0.000274057
C3AR1	318.018	0.920355	0.109712	8.38886	4.90866e-17	9.12239e-16
C3orf14	221.666	0.119795	0.091641	1.30722	0.191138	0.302892
C3orf18	148.278	-0.089662	0.107565	-0.83356	0.404529	0.537435
C3orf20	1.52866	0.222907	0.172566	1.29172	0.196455	0.30946
C3orf22	0.119015	0.0507014	0.558953	0.0907079	0.927725	NA
C3orf33	54.2824	-0.172736	0.11627	-1.48565	0.137373	0.233485
C3orf35	7.93139	0.0704556	0.0995424	0.707796	0.479072	0.605909
C3orf36	6.82842	-0.583394	0.127298	-4.58289	4.58589e-06	2.6135e-05
C3orf38	370.326	0.18389	0.0439402	4.185	2.85166e-05	0.000139837
C3orf52	75.3184	-0.575161	0.12426	-4.62868	3.68006e-06	2.12816e-05
C3orf62	136.405	0.220467	0.0555869	3.96617	7.30361e-05	0.000328153
C3orf70	279.168	-0.722179	0.125024	-5.77632	7.63537e-09	6.4337e-08
C3P1	0.757664	0.917739	0.437301	2.09864	0.0358485	0.0768851
C4A	2093.5	1.02915	0.161664	6.36596	1.94075e-10	1.97687e-09
C4BPA	3.60299	0.285371	0.362745	0.786698	0.431459	0.563034
C4BPB	1.87523	0.524614	0.211067	2.48553	0.0129359	0.0323076
C4orf17	0.0934507	-0.203941	0.727707	-0.280251	0.779285	NA
C4orf19	174.798	-0.406502	0.158365	-2.56687	0.0102622	0.0264552
C4orf3	2062.44	-0.0592288	0.0648022	-0.913994	0.36072	0.492403
C4orf33	124.333	0.260012	0.076181	3.41309	0.000642314	0.00232405
C4orf36	4.12462	-0.28288	0.109113	-2.59254	0.00952713	0.0248629
C4orf45	0.164571	-0.121376	0.370367	-0.327718	0.743125	0.829278
C4orf46	201.548	-0.0828254	0.0721244	-1.14837	0.250817	0.373211
C4orf47	11.1773	-0.546815	0.117685	-4.64644	3.37705e-06	1.96069e-05
C4orf48	164.765	0.126886	0.132942	0.954451	0.339855	0.471723
C4orf50	1.33011	1.70767	0.173745	9.82855	8.48317e-23	2.48407e-21
C4orf51	0.28192	-0.174271	0.623622	-0.27945	0.7799	0.855662
C5	101.675	-0.363439	0.122749	-2.96082	0.00306821	0.00929472
C5AR1	190.971	0.340445	0.12605	2.70088	0.00691569	0.0188998
C5orf15	1495.33	0.105041	0.0832508	1.26175	0.20704	0.322566
C5orf22	915.348	0.36142	0.0810142	4.46119	8.1505e-06	4.44357e-05
C5orf24	1219.58	0.01852	0.0614999	0.301138	0.763309	0.844334
C5orf34	86.6538	-0.0904469	0.0808087	-1.11927	0.263024	0.387242
C5orf38	26.1974	-0.374262	0.218431	-1.71341	0.0866375	0.16088
C5orf46	9.78818	-1.68894	0.247516	-6.82356	8.88087e-12	1.04251e-10
C5orf47	1.95333	-0.142798	0.241463	-0.591388	0.55426	0.674999
C5orf49	6.3849	-0.420039	0.181192	-2.3182	0.0204385	0.0475893
C5orf51	998.841	-0.00445871	0.0600297	-0.074275	0.940792	0.964156
C5orf52	0.174663	-0.0481009	0.382666	-0.1257	0.89997	0.938698
C5orf58	14.6717	-0.253424	0.186744	-1.35707	0.174759	0.282444
C5orf60	0.37684	-0.0547916	0.211652	-0.258876	0.795731	0.866181
C6	8.63263	-0.638187	0.260223	-2.45246	0.0141882	0.0348725
C6orf118	0.814315	-0.58981	0.264025	-2.23392	0.0254884	0.0575593
C6orf120	522.994	0.0721696	0.0563706	1.28027	0.20045	0.314246
C6orf132	27.0588	-1.79928	0.184689	-9.74223	1.99141e-22	5.61291e-21
C6orf136	347.441	0.0254166	0.067324	0.377527	0.705782	0.800878
C6orf141	14.4421	-2.8999	0.260538	-11.1304	8.91976e-29	4.161e-27
C6orf15	1.74765	-2.15885	0.442897	-4.8744	1.0914e-06	6.88552e-06
C6orf163	5.80668	0.137075	0.103449	1.32505	0.185156	0.295683
C6orf201	5.82107	0.11765	0.0939374	1.25243	0.210412	0.326681
C6orf223	13.5043	-0.503069	0.198672	-2.53215	0.0113364	0.0288776
C6orf226	101.113	0.201402	0.104125	1.93424	0.0530838	0.107046
C6orf47	777.888	0.121919	0.0703727	1.73248	0.083188	0.155461
C6orf52	19.5515	0.0117057	0.128842	0.0908535	0.927609	0.956125
C6orf58	1.70523	0.0313259	0.204019	0.153544	0.877969	0.924356
C6orf62	3196.77	0.183416	0.0507958	3.61085	0.000305192	0.00119189
C6orf89	2542.22	-0.0121098	0.04495	-0.269405	0.787618	0.860669
C7	574.737	0.656532	0.202521	3.2418	0.00118778	0.00401683
C7orf25	260.805	-0.184318	0.0926959	-1.98841	0.0467659	0.0964441
C7orf26	743.768	-0.230642	0.070092	-3.29056	0.00099989	0.00345327
C7orf31	193.835	0.0367087	0.074479	0.492872	0.622103	0.734131
C7orf33	0.404914	-0.0587135	0.447479	-0.13121	0.895609	0.935871
C7orf50	1249.65	-0.224161	0.0912867	-2.45557	0.0140661	0.0345988
C7orf57	7.15853	-0.415223	0.138283	-3.00271	0.00267588	0.0082438
C7orf61	10.7333	-0.322886	0.128792	-2.50703	0.012175	0.0307268
C7orf65	0.461441	-0.0843035	0.311599	-0.270552	0.786736	0.860055
C7orf66	0.0541694	-0.121582	1.48828	-0.0816928	0.934891	NA
C7orf69	1.28022	1.08354	0.222512	4.86957	1.11841e-06	7.03662e-06
C8A	0.200015	-0.0700288	0.572031	-0.122421	0.902565	0.940169
C8B	0.461826	-1.01069	0.604972	-1.67063	0.094794	0.172874
C8G	9.17147	0.0506358	0.137827	0.367386	0.713331	0.806884
C8orf31	13.96	-0.586472	0.158111	-3.70924	0.000207886	0.000843813
C8orf33	1395.5	-0.298874	0.0701276	-4.26186	2.02735e-05	0.000102863
C8orf34	1.40055	-0.465353	0.214177	-2.17275	0.0297993	0.0657604
C8orf37	46.0859	-0.0746205	0.0800435	-0.93225	0.351208	0.482899
C8orf44	31.7613	-0.024434	0.0831109	-0.293992	0.768764	0.847953
C8orf48	82.9356	-0.330899	0.139647	-2.36954	0.0178103	0.0423557
C8orf58	369.426	-0.127028	0.0757296	-1.67739	0.0934659	0.170995
C8orf74	0.0998009	-0.225911	0.636936	-0.354684	0.722827	NA
C8orf76	321.904	-0.0826188	0.0459066	-1.79972	0.0719054	0.137899
C8orf86	0.399646	-0.270196	0.246985	-1.09398	0.273965	0.4
C9	1.28092	-0.231823	0.247883	-0.935211	0.349679	0.481538
C9orf116	36.4492	-0.567057	0.108983	-5.20318	1.9591e-07	1.36139e-06
C9orf129	40.4172	0.0303604	0.207153	0.14656	0.883479	0.928296
C9orf131	2.06146	-0.0257187	0.160212	-0.160528	0.872465	0.920389
C9orf135	0.271756	-0.370285	0.53313	-0.69455	0.487337	0.614235
C9orf139	6.81012	1.09834	0.138684	7.91969	2.38095e-15	3.8628e-14
C9orf152	2.04332	-0.386272	0.197564	-1.95517	0.0505626	0.102877
C9orf153	1.119	-0.00138164	0.158479	-0.00871816	0.993044	0.995553
C9orf16	817.031	0.0150756	0.118385	0.127344	0.898668	0.938253
C9orf163	6.67964	-0.126334	0.105976	-1.19211	0.233219	0.354097
C9orf24	2.95632	-0.149479	0.136171	-1.09773	0.272324	0.397988
C9orf40	116.94	0.0657775	0.0818418	0.803715	0.421561	0.554253
C9orf43	11.5725	-0.170463	0.100598	-1.69451	0.0901688	0.166101
C9orf47	6.6732	-0.415491	0.169086	-2.45727	0.0139996	0.0344668
C9orf50	6.22078	-0.645596	0.144415	-4.47041	7.80708e-06	4.27081e-05
C9orf57	0.0969113	0.138581	0.624833	0.22179	0.824478	NA
C9orf64	278.737	-0.0123471	0.0652839	-0.189129	0.849991	0.904238
C9orf72	169.879	0.247461	0.0705303	3.50858	0.000450502	0.00169401
C9orf78	1117.9	0.029323	0.0398467	0.735894	0.461795	0.590539
C9orf85	158.199	0.0650729	0.0644836	1.00914	0.312908	0.443462
CA1	0.690959	0.264581	0.378458	0.699103	0.484488	0.611413
CA10	2.34105	-2.14636	0.328357	-6.53666	6.29094e-11	6.76329e-10
CA11	241.905	0.0957375	0.100623	0.951447	0.341377	0.473265
CA12	463.974	-0.807194	0.19142	-4.21688	2.47703e-05	0.000122965
CA13	54.5929	0.16974	0.116714	1.45433	0.145856	0.24475
CA14	1253.73	-0.159568	0.185787	-0.858878	0.390408	0.5231
CA2	166.053	-1.04769	0.165989	-6.31184	2.75738e-10	2.75123e-09
CA3	6.58379	-0.0946155	0.186046	-0.508561	0.61106	0.724823
CA4	7.79165	-0.955066	0.196367	-4.86367	1.15231e-06	7.23577e-06
CA5A	0.175226	-0.137864	0.488359	-0.2823	0.777713	0.854428
CA5B	355.802	-0.0384565	0.0896215	-0.429099	0.667851	0.77149
CA6	33.7105	-1.76169	0.350658	-5.02395	5.06196e-07	3.34156e-06
CA7	1.43532	-0.662909	0.198782	-3.33486	0.000853426	0.00299892
CA8	199.672	0.326614	0.234651	1.39192	0.163948	0.268369
CA9	34.2851	-1.99182	0.234488	-8.49434	1.99059e-17	3.82755e-16
CAB39	1313.81	0.0789427	0.0549245	1.43729	0.150634	0.251328
CAB39L	226.996	-0.116272	0.08248	-1.4097	0.158628	0.261518
CABIN1	2574.71	-0.0597051	0.0742297	-0.804329	0.421207	0.553923
CABLES1	3691.59	0.127808	0.13017	0.981849	0.326174	0.457229
CABLES2	287.168	-0.157299	0.0763569	-2.06005	0.0393939	0.0834442
CABP1	6.78491	-0.461024	0.125765	-3.66575	0.000246617	0.000984878
CABP2	0.0100466	-0.0282485	3.13166	-0.00902028	0.992803	NA
CABP4	15.3255	-0.0770918	0.174913	-0.440743	0.659399	0.764966
CABP5	0.177336	-0.178163	0.446659	-0.39888	0.689982	0.788733
CABP7	7.00182	0.325943	0.135698	2.40198	0.0163067	0.0393344
CABYR	69.8627	-0.245342	0.105339	-2.32908	0.0198551	0.0464189
CACHD1	315.007	-0.53859	0.122167	-4.40862	1.04032e-05	5.56611e-05
CACNA1A	46.2779	0.0437789	0.140006	0.312694	0.754513	0.837977
CACNA1B	15.3739	-0.526226	0.22506	-2.33816	0.0193792	0.0454449
CACNA1C	109.173	-0.704826	0.131407	-5.3637	8.15361e-08	5.98377e-07
CACNA1D	126.794	-0.2306	0.15476	-1.49004	0.136213	0.231907
CACNA1E	15.6915	0.164057	0.169188	0.969674	0.332209	0.463511
CACNA1F	5.77459	0.496434	0.133257	3.7254	0.000195007	0.000794745
CACNA1G	11.9956	-1.968	0.177052	-11.1154	1.05615e-28	4.85647e-27
CACNA1H	195.091	-0.333156	0.158415	-2.10306	0.0354605	0.0761997
CACNA1I	13.908	0.225951	0.185609	1.21735	0.22347	0.342006
CACNA1S	1.00516	-0.918162	0.33705	-2.72412	0.0064474	0.0178252
CACNA2D1	76.3637	-0.383147	0.154519	-2.47961	0.0131526	0.0327674
CACNA2D2	48.2145	-0.203265	0.166925	-1.2177	0.223339	0.341902
CACNA2D3	10.8895	-0.866373	0.181887	-4.76326	1.90491e-06	1.1448e-05
CACNA2D4	93.6675	-0.188385	0.161484	-1.16659	0.243377	0.365145
CACNB1	117.006	-0.131116	0.0746241	-1.75702	0.0789148	0.14884
CACNB2	15.2128	-0.612322	0.107901	-5.67483	1.38829e-08	1.13763e-07
CACNB3	325.235	-0.417576	0.0954329	-4.3756	1.21098e-05	6.39002e-05
CACNB4	21.2723	-0.442961	0.136302	-3.24984	0.00115469	0.00391561
CACNG1	0.447133	-0.0745218	0.390886	-0.190648	0.848801	0.903479
CACNG2	0.123004	-0.115977	0.653166	-0.177561	0.859067	NA
CACNG3	0.458557	1.62228	0.256201	6.33207	2.41894e-10	2.42557e-09
CACNG4	19.4489	-1.70189	0.245389	-6.93547	4.04863e-12	4.90283e-11
CACNG5	0.940537	-0.924447	0.32707	-2.82645	0.00470675	0.0135486
CACNG6	0.80804	0.113498	0.294922	0.38484	0.700356	0.796687
CACNG7	1.19288	-2.39269	0.449594	-5.3219	1.02688e-07	7.41768e-07
CACNG8	0.525739	-0.494429	0.284802	-1.73604	0.082556	0.154468
CACYBP	1435.03	-0.0482066	0.0610661	-0.789417	0.429868	0.561915
CAD	2427.18	-0.322159	0.0665524	-4.84068	1.29396e-06	8.06543e-06
CADM1	1361.76	-0.705975	0.128644	-5.48782	4.06927e-08	3.11416e-07
CADM2	5.16561	-0.343365	0.246926	-1.39056	0.164359	0.268902
CADM3	283.937	-0.198905	0.205103	-0.96978	0.332156	0.463511
CADM4	827.436	-0.642073	0.138295	-4.64278	3.4375e-06	1.99435e-05
CADPS	265.628	0.121441	0.193835	0.626519	0.530975	0.653726
CADPS2	522.327	0.280126	0.130334	2.14929	0.0316114	0.069237
CAGE1	1.28797	-0.205039	0.143403	-1.42981	0.152773	0.253948
CALB1	1.72338	0.158116	0.184911	0.855092	0.3925	0.525314
CALB2	22.2905	-1.77067	0.236266	-7.49439	6.66069e-14	9.49487e-13
CALCA	0.842616	-1.14124	0.349222	-3.26794	0.00108332	0.00370405
CALCB	1.01556	-1.38175	0.292653	-4.72145	2.34171e-06	1.38608e-05
CALCOCO1	1269.44	0.0566274	0.0558084	1.01468	0.31026	0.440514
CALCOCO2	1396.96	0.250549	0.0400343	6.25837	3.89023e-10	3.80142e-09
CALCR	9.55283	0.204765	0.171425	1.19449	0.232287	0.352981
CALCRL	197.965	-0.676299	0.113714	-5.94738	2.72476e-09	2.42814e-08
CALD1	4657.6	-0.149456	0.0626639	-2.38504	0.0170773	0.0408749
CALHM1	1.61549	0.221259	0.134973	1.63928	0.101155	0.182367
CALHM2	383.763	0.0827289	0.0991734	0.834185	0.404177	0.537012
CALHM3	0.509245	0.0224982	0.247873	0.0907651	0.927679	0.956136
CALM1	6588.94	-0.0810037	0.0691269	-1.17181	0.241273	0.362867
CALM2	6552.47	-0.0417463	0.0641364	-0.6509	0.515111	0.639775
CALM3	5218.09	0.0348496	0.0643389	0.541657	0.588055	0.70507
CALML3	227.378	-6.26483	0.47274	-13.2522	4.38436e-40	5.64495e-38
CALML4	161.567	0.31566	0.0830487	3.8009	0.000144172	0.000606142
CALML5	336.993	-4.66517	0.472765	-9.86784	5.73892e-23	1.71358e-21
CALML6	2.8279	-0.281896	0.158975	-1.77321	0.0761936	0.144691
CALN1	9.91245	-1.57316	0.279043	-5.6377	1.72339e-08	1.39238e-07
CALR	21925	-0.059517	0.0594263	-1.00153	0.316573	0.447237
CALR3	1.06402	-0.110803	0.173008	-0.640449	0.521881	0.646029
CALU	9982.81	-0.376743	0.0752301	-5.00788	5.50339e-07	3.6196e-06
CALY	0.822207	0.107863	0.225269	0.478817	0.632069	0.742465
CAMK1	259.519	0.210243	0.0982567	2.13973	0.0323766	0.0706331
CAMK1D	46.5739	0.260746	0.123714	2.10765	0.0350616	0.0754944
CAMK1G	49.5259	0.407698	0.185073	2.2029	0.0276017	0.061629
CAMK2A	37.4699	-0.257494	0.163599	-1.57393	0.115504	0.202806
CAMK2B	33.4384	-1.34019	0.160978	-8.32526	8.41406e-17	1.54057e-15
CAMK2D	914.181	-0.187393	0.063482	-2.9519	0.00315823	0.00953632
CAMK2G	355.788	0.0168112	0.048353	0.347677	0.728083	0.818913
CAMK2N1	472.868	-0.2967	0.128594	-2.30725	0.0210407	0.0487938
CAMK2N2	35.0206	-0.0186055	0.175933	-0.105753	0.915778	0.948321
CAMK4	45.9668	0.293943	0.150395	1.95447	0.0506453	0.102993
CAMKK1	167.5	-0.214885	0.0808964	-2.65631	0.0079002	0.0211452
CAMKK2	997.089	-0.0408576	0.0450609	-0.906719	0.364555	0.496536
CAMKV	9.73894	-1.75946	0.225555	-7.80059	6.16179e-15	9.68436e-14
CAMLG	606.41	0.0415729	0.0626018	0.664085	0.506636	0.632028
CAMP	8.30025	-0.109471	0.21755	-0.503198	0.614825	0.727841
CAMSAP1	860.946	-0.218031	0.0483958	-4.50516	6.63225e-06	3.67814e-05
CAMTA1	409.597	0.0187534	0.0594891	0.315242	0.752578	0.836519
CAMTA2	1169.02	-0.0344523	0.0604619	-0.569819	0.568801	0.688188
CAND1	2387.95	-0.144524	0.0560684	-2.57764	0.00994762	0.0257556
CAND2	161.229	0.0171594	0.114277	0.150156	0.880642	0.926232
CANT1	1511.71	-0.0516425	0.0539774	-0.956742	0.338698	0.470725
CANX	15402.8	-0.0342617	0.0448633	-0.763693	0.445051	0.576238
CAP1	7444.5	0.0351106	0.0515289	0.681377	0.495633	0.622014
CAP2	384.881	0.0570904	0.149651	0.381491	0.702839	0.798445
CAPG	5442.82	0.258972	0.164246	1.57673	0.114857	0.202023
CAPN1	3258.74	-0.110992	0.0660007	-1.68167	0.092632	0.16972
CAPN10	386.773	0.0259554	0.0599564	0.432906	0.665083	0.769231
CAPN11	10.051	-0.259554	0.129131	-2.01001	0.0444306	0.0923261
CAPN12	79.2029	0.049712	0.143995	0.345234	0.729918	0.819988
CAPN13	1.35765	-0.885127	0.346512	-2.55439	0.0106374	0.0272696
CAPN14	14.6113	-0.0820344	0.150451	-0.545256	0.585578	0.702833
CAPN2	4727.04	-0.261767	0.054955	-4.76329	1.90461e-06	1.1448e-05
CAPN3	5038.48	0.455741	0.14122	3.22716	0.00125027	0.00420342
CAPN5	1136.97	-0.324806	0.118622	-2.73816	0.00617834	0.0171794
CAPN6	19.4293	-0.191214	0.221756	-0.862275	0.388536	0.521135
CAPN7	626.532	-0.0300937	0.0443643	-0.67833	0.497563	0.623901
CAPN8	1.6898	-0.451398	0.258856	-1.74382	0.0811911	0.152313
CAPN9	2.69096	0.603725	0.235032	2.56869	0.0102082	0.0263541
CAPNS1	7096.26	-0.0595635	0.0708335	-0.840896	0.400406	0.53297
CAPNS2	23.9038	-2.44667	0.235795	-10.3762	3.18036e-25	1.1103e-23
CAPRIN1	5582.45	-0.0498996	0.0400744	-1.24517	0.213068	0.32985
CAPRIN2	473.542	-0.060738	0.0708455	-0.85733	0.391263	0.524049
CAPS	414.328	-0.475725	0.128287	-3.70827	0.000208676	0.000846381
CAPS2	20.362	0.189041	0.0894487	2.1134	0.0345666	0.0747333
CAPSL	0.35627	-1.15889	0.527864	-2.19542	0.0281334	0.0625722
CAPZA1	2782.64	0.163149	0.0509521	3.202	0.00136477	0.00454565
CAPZA2	1776.26	-0.0261472	0.0602857	-0.433722	0.66449	0.768821
CAPZA3	0.202939	-0.681797	0.809387	-0.842363	0.399585	0.532229
CAPZB	4696.09	0.108917	0.0472871	2.30331	0.0212611	0.0491704
CARD10	185.32	-0.774818	0.122042	-6.34876	2.17052e-10	2.19149e-09
CARD11	217.695	1.48878	0.157408	9.45812	3.1354e-21	8.06088e-20
CARD14	134.452	-0.0383968	0.140518	-0.273251	0.78466	0.858602
CARD16	390.346	0.226867	0.128042	1.77183	0.0764236	0.145083
CARD17	0.842864	0.670628	0.256907	2.61039	0.00904389	0.0237753
CARD18	3.91866	-3.74907	0.606202	-6.18453	6.22893e-10	5.92835e-09
CARD6	235.537	-0.000535994	0.0930734	-0.00575883	0.995405	0.996892
CARD8	703.55	0.297469	0.078003	3.81356	0.000136982	0.000578783
CARD9	65.5196	0.830246	0.102698	8.08437	6.24878e-16	1.05972e-14
CARHSP1	921.161	-0.38107	0.0913735	-4.17047	3.03974e-05	0.000148292
CARM1	1592.36	-0.168025	0.0625029	-2.68827	0.00718239	0.0195009
CARNS1	25.1996	0.165374	0.12264	1.34846	0.177512	0.285945
CARS2	962.781	-0.0516774	0.0606598	-0.851922	0.394258	0.527184
CARTPT	0.0828687	0.275926	1.04368	0.264377	0.791489	NA
CASC2	12.2298	-0.0851312	0.130935	-0.650178	0.515577	0.640193
CASC3	2082.92	-0.0829209	0.0411995	-2.01267	0.0441499	0.0918258
CASD1	551.862	-0.0423825	0.0662798	-0.639447	0.522532	0.646488
CASK	680.136	-0.231052	0.057754	-4.00063	6.31733e-05	0.000287857
CASKIN1	57.0986	-0.651778	0.165856	-3.92979	8.502e-05	0.000376565
CASKIN2	637.76	-0.271625	0.0658469	-4.1251	3.70576e-05	0.000177132
CASP1	851.241	0.442237	0.123834	3.5712	0.000355345	0.00136807
CASP10	195.523	0.607847	0.0975444	6.23149	4.62023e-10	4.47132e-09
CASP14	83.2782	-4.70288	0.614006	-7.65934	1.86891e-14	2.8058e-13
CASP2	1468.34	-0.111941	0.0550447	-2.03364	0.0419874	0.0880307
CASP3	556.207	0.202872	0.054105	3.74961	0.000177113	0.000730699
CASP4	1072.7	0.400021	0.0711622	5.62126	1.89568e-08	1.52393e-07
CASP5	5.65017	1.6024	0.146638	10.9276	8.50546e-28	3.63095e-26
CASP6	142.445	-0.0233566	0.0541399	-0.431413	0.666168	0.770209
CASP7	371.745	0.226183	0.0626342	3.61117	0.000304821	0.0011913
CASP8	473.572	0.349007	0.0698784	4.99448	5.89937e-07	3.86581e-06
CASP9	328.39	0.0892411	0.0689319	1.29463	0.195449	0.308388
CASQ1	6.56031	0.514446	0.162911	3.15784	0.00158944	0.00519611
CASQ2	25.6991	-0.255298	0.154382	-1.65368	0.0981926	0.178023
CASR	1.04937	-0.30897	0.299336	-1.03218	0.301987	0.431708
CASS4	29.8115	0.641066	0.120148	5.33564	9.52068e-08	6.91141e-07
CAST	3331.21	0.120884	0.057426	2.10504	0.0352874	0.0758897
CASZ1	177.926	-0.336651	0.149519	-2.25156	0.0243499	0.055242
CAT	1252.43	0.105291	0.0752667	1.39891	0.161839	0.265563
CATSPER1	10.7814	-0.306093	0.147802	-2.07097	0.0383616	0.0815685
CATSPER2	23.826	0.276472	0.0837576	3.30085	0.000963916	0.0033441
CATSPER2P1	25.5088	0.0536975	0.0830114	0.646869	0.517717	0.641979
CATSPER3	4.1946	-0.00464037	0.106513	-0.0435661	0.96525	0.979693
CATSPER4	0.069534	0.0176424	0.807278	0.0218542	0.982564	NA
CATSPERB	4.56826	-0.735487	0.248101	-2.96447	0.00303208	0.00920029
CATSPERG	9.06112	0.0445278	0.0953227	0.467127	0.640409	0.749443
CAV1	4499.62	-0.213073	0.0902604	-2.36065	0.0182429	0.0432211
CAV2	976.62	0.0486859	0.0869179	0.560137	0.575386	0.694225
CAV3	0.515288	-0.802646	0.449731	-1.78473	0.0743057	0.141759
CBFA2T2	737.279	-0.0503948	0.0478559	-1.05305	0.292317	0.42065
CBFA2T3	96.884	0.581957	0.151657	3.83732	0.000124383	0.000530565
CBFB	1245.46	-0.0994002	0.0501717	-1.9812	0.0475689	0.097887
[truncated: 14,746 more rows]

## Sheet: up-regurated genes
Table S3. 63 upregulated genes in the high-immunity cohort
genes	log2FoldChange	padj	trend
PLA2G2D	3.06206	1.65326e-49	UP
IFNG	2.68241	1.14908e-53	UP
LAG3	2.65882	2.45778e-78	UP
CD8B	2.60766	2.09334e-60	UP
NKG7	2.58982	4.64641e-64	UP
FCRL4	2.54639	3.29047e-15	UP
PDCD1	2.49263	1.22893e-63	UP
CXCL9	2.48979	2.49677e-45	UP
NEUROG3	2.48622	7.32482e-26	UP
IDO1	2.47915	1.12667e-44	UP
GZMK	2.45073	1.93176e-47	UP
JAKMIP1	2.44944	5.0776e-57	UP
CD8A	2.44477	1.35063e-58	UP
DTHD1	2.43804	1.04648e-52	UP
PRF1	2.43718	1.38093e-62	UP
IL21	2.40921	3.02574e-23	UP
CXCL13	2.39911	1.15641e-30	UP
UBD	2.37555	2.63099e-42	UP
ADORA2A	2.36048	2.96062e-15	UP
SLC27A2	2.35065	2.35824e-43	UP
KLRD1	2.35032	2.27499e-61	UP
CCL5	2.34799	2.70316e-58	UP
SIRPG	2.33711	4.50651e-48	UP
SH2D1A	2.33305	1.85152e-51	UP
TIGIT	2.32914	5.70972e-57	UP
FCRL3	2.28608	1.24443e-29	UP
GBP5	2.26507	4.75684e-52	UP
FASLG	2.25626	5.21309e-54	UP
GZMA	2.25116	2.23503e-51	UP
GBP4	2.22431	6.76357e-53	UP
GPR171	2.20172	2.29149e-54	UP
CD38	2.19806	9.36252e-42	UP
CCL25	2.19728	3.28488e-30	UP
KIR2DL4	2.19359	4.15972e-42	UP
GZMH	2.18508	1.02825e-46	UP
XCL2	2.17433	5.05523e-50	UP
CD27	2.16057	3.00252e-44	UP
CXCR3	2.14405	4.32549e-44	UP
SLAMF6	2.13502	4.95351e-40	UP
STAP1	2.10865	2.11029e-24	UP
CD7	2.1071	3.94092e-45	UP
CR1L	2.10643	1.0997e-30	UP
KLRC1	2.10555	2.16852e-39	UP
TBX21	2.10285	5.84394e-52	UP
CRTAM	2.10282	9.03984e-52	UP
SIGLEC8	2.07486	3.76269e-35	UP
FCRL1	2.07333	1.1264e-13	UP
TRAT1	2.06715	5.46486e-36	UP
THEMIS	2.05448	7.26465e-34	UP
CXCL10	2.054	7.74855e-35	UP
HAVCR1	2.04878	1.26681e-26	UP
CD2	2.04757	6.97823e-45	UP
SIT1	2.04323	2.28285e-38	UP
TARP	2.04233	2.06689e-42	UP
PYHIN1	2.03868	4.70356e-43	UP
FCRL2	2.03589	6.25992e-17	UP
IKZF3	2.0358	4.20717e-31	UP
TNFRSF17	2.03486	2.37281e-20	UP
LCN8	2.03409	4.9124e-06	UP
CCL4	2.01708	1.34694e-53	UP
ZBP1	2.01471	3.76809e-32	UP
CD3D	2.00335	1.1392e-35	UP
GTSF1L	2.00263	8.43401e-31	UP

## Sheet: down-regurated genes
Table S3. 384 downregulated genes in the high-immunity cohort
genes	log2FoldChange	padj	trend
SPRR1A	-7.71308	2.70317e-58	DOWN
C10orf99	-6.50454	1.31145e-36	DOWN
KLK5	-6.40405	6.55039e-43	DOWN
LGALS7	-6.38806	8.87577e-53	DOWN
CALML3	-6.26483	5.64495e-38	DOWN
S100A7A	-6.21559	3.5023e-31	DOWN
KRT6C	-5.95855	5.33624e-40	DOWN
CDSN	-5.91801	1.0392e-72	DOWN
SPRR2E	-5.82827	8.19858e-34	DOWN
CRCT1	-5.80711	8.34398e-28	DOWN
LCE3D	-5.6678	5.73878e-26	DOWN
KRT16	-5.66522	2.58552e-45	DOWN
AMY1A	-5.63777	4.00878e-47	DOWN
KLK7	-5.55076	5.00587e-35	DOWN
WFDC12	-5.49292	3.66323e-18	DOWN
SPRR1B	-5.43979	6.49552e-31	DOWN
KRT6B	-5.30424	6.60506e-48	DOWN
KLK9	-5.23248	1.56406e-18	DOWN
SBSN	-5.22919	1.58797e-70	DOWN
KPRP	-5.20582	1.37056e-27	DOWN
S100A7	-5.19991	6.94156e-30	DOWN
KRT1	-5.17992	3.98028e-34	DOWN
KLK8	-5.17795	1.70707e-25	DOWN
CWH43	-5.11577	9.40594e-27	DOWN
LGALS7B	-5.08421	5.31461e-27	DOWN
KRT5	-5.08182	1.59949e-48	DOWN
SPRR2A	-5.03197	3.31708e-28	DOWN
C1orf68	-5.02527	1.01547e-13	DOWN
IVL	-4.98144	1.95568e-36	DOWN
SERPINB4	-4.97407	2.65163e-32	DOWN
LCE3E	-4.97336	1.41607e-15	DOWN
LCE2B	-4.96871	2.23178e-10	DOWN
KRT6A	-4.93511	5.38705e-33	DOWN
KRT14	-4.91157	2.37662e-38	DOWN
LY6D	-4.89923	1.71987e-30	DOWN
WFDC5	-4.89686	3.4893e-20	DOWN
LCE1F	-4.86548	3.3339e-14	DOWN
SPRR4	-4.80161	1.17053e-12	DOWN
CBLC	-4.79524	6.652e-25	DOWN
SPRR2G	-4.73059	3.25729e-19	DOWN
LCE2D	-4.72512	1.41253e-10	DOWN
FAM25A	-4.72347	4.95313e-15	DOWN
LCE1C	-4.71854	4.17425e-20	DOWN
FOXN1	-4.71642	6.71027e-22	DOWN
LCE6A	-4.71624	8.85001e-10	DOWN
CASP14	-4.70288	2.8058e-13	DOWN
SFN	-4.68911	3.87127e-54	DOWN
CALML5	-4.66517	1.71358e-21	DOWN
KRT71	-4.65982	1.10199e-07	DOWN
FAM83C	-4.65356	2.14686e-38	DOWN
FLG2	-4.64213	4.09987e-44	DOWN
PGLYRP3	-4.63424	3.65506e-16	DOWN
SERPINB3	-4.62912	2.81558e-23	DOWN
SERPINB7	-4.61203	5.84394e-52	DOWN
SPRR2B	-4.59348	6.48763e-19	DOWN
LY6G6C	-4.56654	2.0386e-29	DOWN
DEFB103B	-4.56543	7.06951e-18	DOWN
DSG1	-4.53983	6.61591e-30	DOWN
PLA2G4D	-4.52524	2.36361e-26	DOWN
DCD	-4.51139	6.31667e-05	DOWN
KRT75	-4.50985	4.7687e-22	DOWN
PI3	-4.50714	5.6715e-48	DOWN
KRT17	-4.47799	1.28771e-51	DOWN
PGLYRP4	-4.47372	7.30093e-22	DOWN
KRT2	-4.4535	2.0793e-31	DOWN
KLK11	-4.41297	2.58353e-22	DOWN
TRIM29	-4.40243	8.08325e-42	DOWN
STATH	-4.3604	1.72669e-11	DOWN
LCE2C	-4.33969	6.0389e-09	DOWN
PRSS3	-4.30077	1.95115e-40	DOWN
DEFB4A	-4.2909	1.87994e-13	DOWN
KRTDAP	-4.23623	1.59668e-14	DOWN
DSC3	-4.21442	2.39528e-35	DOWN
PLA2G4E	-4.19727	6.49297e-18	DOWN
ALOXE3	-4.19612	2.3236e-50	DOWN
COL17A1	-4.18291	3.97278e-48	DOWN
DSC1	-4.15497	8.55107e-22	DOWN
KRT9	-4.15259	2.41382e-15	DOWN
PLA2G4F	-4.11124	1.23837e-28	DOWN
FGFBP1	-4.07123	3.49636e-21	DOWN
SERPINB5	-4.04405	2.14311e-23	DOWN
PLA2G3	-4.04211	6.68909e-22	DOWN
EREG	-4.04157	8.00524e-41	DOWN
SLPI	-4.01842	9.40649e-39	DOWN
AADACL2	-4.01739	8.4987e-15	DOWN
S100A14	-4.00961	9.91146e-37	DOWN
SDR9C7	-4.00099	1.27836e-19	DOWN
PDZK1IP1	-3.97461	6.02123e-36	DOWN
VAT1L	-3.96697	3.86561e-58	DOWN
FLG	-3.95795	2.99788e-58	DOWN
KLK12	-3.95305	2.22879e-13	DOWN
UNC93A	-3.93654	4.43053e-10	DOWN
FAM83A	-3.93348	1.51377e-31	DOWN
CRABP1	-3.92039	5.13312e-39	DOWN
ALOX12B	-3.91147	1.45877e-35	DOWN
RAB25	-3.89979	4.98872e-34	DOWN
CLCA2	-3.89234	3.25389e-47	DOWN
LCE1B	-3.88852	2.62598e-16	DOWN
LCE3A	-3.87003	9.95148e-06	DOWN
PSAPL1	-3.85198	9.07144e-15	DOWN
PLA2G2F	-3.84658	1.81353e-12	DOWN
OTOR	-3.82973	7.17415e-06	DOWN
FADS6	-3.82326	6.50615e-14	DOWN
KLK10	-3.7914	4.3132e-35	DOWN
ANXA8	-3.75471	1.28242e-27	DOWN
LCE1D	-3.75321	3.43794e-12	DOWN
CARD18	-3.74907	5.92835e-09	DOWN
SPRR2D	-3.72008	1.23614e-25	DOWN
SCGB2A2	-3.71477	0.000144898	DOWN
A2ML1	-3.71453	4.77124e-28	DOWN
KRT77	-3.70427	1.48469e-11	DOWN
LCE1E	-3.68874	3.82588e-14	DOWN
PKP1	-3.67053	3.85528e-36	DOWN
MUCL1	-3.6551	4.25439e-16	DOWN
SERPINB12	-3.64362	3.85362e-09	DOWN
TMPRSS4	-3.63431	5.33966e-23	DOWN
PSORS1C2	-3.62856	5.35002e-36	DOWN
GGT6	-3.62126	1.6077e-21	DOWN
IGFL1	-3.61102	3.9747e-09	DOWN
PPP2R2C	-3.6107	7.76595e-38	DOWN
TMEM40	-3.60159	2.23255e-21	DOWN
SERPINB13	-3.57131	4.1344e-16	DOWN
KRT25	-3.54887	0.000171639	DOWN
PROM2	-3.54518	1.48222e-54	DOWN
AKR1B10	-3.54064	7.0838e-25	DOWN
EDN3	-3.5346	8.35391e-18	DOWN
SPINK6	-3.48205	1.93862e-15	DOWN
EVPL	-3.48188	2.15355e-39	DOWN
FETUB	-3.48035	9.62099e-21	DOWN
LCE1A	-3.44203	1.28536e-08	DOWN
SLC6A14	-3.42434	1.39929e-17	DOWN
FERMT1	-3.42286	2.09185e-42	DOWN
SOX11	-3.41783	5.6715e-48	DOWN
TACSTD2	-3.4176	1.03637e-43	DOWN
S100A2	-3.39634	7.60527e-52	DOWN
KRT15	-3.38907	4.59307e-27	DOWN
ACER1	-3.37909	1.0649e-16	DOWN
WIF1	-3.37172	4.19086e-25	DOWN
GRHL2	-3.36412	8.49187e-25	DOWN
ZNF750	-3.36049	4.41324e-39	DOWN
FAM83B	-3.34925	2.67035e-24	DOWN
ABCA12	-3.34866	2.08877e-36	DOWN
SCGB1A1	-3.34794	1.39201e-05	DOWN
LIPM	-3.33283	1.81564e-06	DOWN
KRT31	-3.32157	1.25003e-11	DOWN
ROS1	-3.29344	3.94561e-18	DOWN
KRT74	-3.28446	1.80857e-07	DOWN
KLK13	-3.27308	1.32908e-27	DOWN
GJB5	-3.26225	2.62674e-37	DOWN
MAL2	-3.2619	5.09002e-29	DOWN
ARG1	-3.24165	1.50305e-18	DOWN
CST6	-3.22777	3.364e-31	DOWN
HS3ST6	-3.22742	5.4921e-12	DOWN
RNASE7	-3.22179	1.04718e-27	DOWN
WNT7B	-3.22068	7.51413e-32	DOWN
FBN3	-3.19295	6.08599e-24	DOWN
KRT34	-3.1902	1.81035e-12	DOWN
OVOL2	-3.1781	1.21302e-16	DOWN
AKR1B15	-3.14583	1.43241e-14	DOWN
SLC1A6	-3.14438	1.68568e-17	DOWN
TAC1	-3.13651	1.43169e-11	DOWN
DLX3	-3.10504	7.50696e-40	DOWN
EPPK1	-3.10163	6.04913e-50	DOWN
EPGN	-3.09438	3.7151e-11	DOWN
AP1M2	-3.09341	1.7225e-25	DOWN
CHRNA9	-3.0871	7.25561e-25	DOWN
CXCL5	-3.0832	1.53098e-28	DOWN
CNFN	-3.06786	1.18886e-42	DOWN
KLK6	-3.06624	1.22344e-19	DOWN
LYPD3	-3.0606	1.31637e-45	DOWN
PIK3C2G	-3.05566	3.31391e-09	DOWN
KRT10	-3.02362	3.80658e-52	DOWN
DSG3	-3.01852	1.2051e-14	DOWN
EPN3	-3.01074	3.16592e-28	DOWN
HAL	-3.00756	1.07469e-27	DOWN
KRT78	-3.00494	1.70071e-12	DOWN
GJB3	-3.00319	1.03164e-28	DOWN
RAET1L	-2.99853	3.19817e-10	DOWN
ARSF	-2.99331	6.79038e-12	DOWN
SLURP1	-2.98289	1.67496e-07	DOWN
TMPRSS11D	-2.96875	4.99152e-15	DOWN
GJB4	-2.96597	2.39298e-17	DOWN
CYP4F22	-2.94763	1.38374e-28	DOWN
BNC1	-2.94355	1.32485e-34	DOWN
GPR87	-2.93456	5.16287e-15	DOWN
SPRR2F	-2.92734	5.86742e-12	DOWN
LCN2	-2.92579	1.32367e-19	DOWN
DSP	-2.92535	2.88473e-30	DOWN
BBOX1	-2.91052	1.30588e-23	DOWN
VSNL1	-2.90873	4.76842e-41	DOWN
XDH	-2.90821	1.02978e-26	DOWN
CHP2	-2.9067	6.12683e-13	DOWN
NEU2	-2.90444	1.56229e-05	DOWN
C6orf141	-2.8999	4.161e-27	DOWN
SULT2B1	-2.89739	1.65259e-34	DOWN
SDR16C5	-2.89702	3.01023e-19	DOWN
BNIPL	-2.89012	5.22548e-43	DOWN
IGFL3	-2.87431	7.86338e-10	DOWN
OTOP3	-2.86933	8.62401e-06	DOWN
SERPINA12	-2.86562	1.76423e-17	DOWN
POF1B	-2.85878	3.57188e-21	DOWN
PKP3	-2.84313	3.05097e-28	DOWN
C19orf33	-2.84109	5.92929e-18	DOWN
NRXN1	-2.83959	1.86155e-20	DOWN
GRIA1	-2.83895	5.75274e-19	DOWN
SOX21	-2.80407	1.40983e-17	DOWN
SERPINB2	-2.7938	1.63893e-24	DOWN
TMEM45B	-2.79235	1.56387e-29	DOWN
DUOXA1	-2.79233	1.61881e-24	DOWN
HEPHL1	-2.78754	1.28971e-23	DOWN
IL1F10	-2.78649	2.55274e-05	DOWN
S100A8	-2.77663	1.5691e-27	DOWN
SLC15A1	-2.7735	1.59553e-17	DOWN
KRT33B	-2.75943	5.7409e-05	DOWN
ASPRV1	-2.74823	7.66297e-42	DOWN
TGM1	-2.74663	1.83302e-35	DOWN
PRSS8	-2.725	1.7402e-27	DOWN
GPRIN2	-2.7137	1.22387e-16	DOWN
SPINK7	-2.7083	3.11907e-07	DOWN
LIPK	-2.70314	4.86143e-06	DOWN
SCNN1A	-2.6988	1.82676e-34	DOWN
TNS4	-2.68809	1.08596e-26	DOWN
LGR5	-2.68162	4.14831e-27	DOWN
UGT1A6	-2.67556	4.09848e-11	DOWN
GSDMC	-2.67212	3.33675e-32	DOWN
SLC6A2	-2.66911	1.97647e-11	DOWN
KRT79	-2.6632	4.73898e-19	DOWN
MMP10	-2.6537	3.85791e-25	DOWN
LCE3C	-2.64636	0.0166554	DOWN
TGM3	-2.64551	4.13683e-18	DOWN
RHOV	-2.64003	6.48888e-33	DOWN
KCNQ2	-2.63374	5.46449e-12	DOWN
KRT80	-2.63155	9.18995e-27	DOWN
POU2F3	-2.62845	1.01548e-22	DOWN
CNTN6	-2.61938	1.67479e-18	DOWN
GRHL3	-2.61878	1.61465e-24	DOWN
SPINK5	-2.61271	3.48349e-21	DOWN
STAC2	-2.60926	7.51413e-32	DOWN
S100A9	-2.60653	3.68549e-31	DOWN
LHX8	-2.60025	9.00688e-12	DOWN
GABRA2	-2.59916	3.83493e-16	DOWN
FEV	-2.59886	5.24638e-15	DOWN
RPTN	-2.59085	1.15353e-07	DOWN
TMEFF2	-2.58695	1.23964e-11	DOWN
NLRP10	-2.58687	2.10039e-08	DOWN
SLC6A11	-2.57865	4.52045e-13	DOWN
LCE5A	-2.57615	1.63071e-13	DOWN
PRB1	-2.56631	9.46088e-07	DOWN
UGT1A7	-2.5639	4.44206e-05	DOWN
NHEG1	-2.5604	1.13031e-06	DOWN
LIPN	-2.555	9.68463e-09	DOWN
RP1	-2.54275	2.425e-19	DOWN
NPTX2	-2.54073	1.83825e-22	DOWN
IRX4	-2.53684	1.38269e-13	DOWN
SHISA9	-2.53298	4.611e-17	DOWN
CNTNAP5	-2.53205	1.01181e-13	DOWN
TMEM184A	-2.52722	4.27465e-29	DOWN
USH1G	-2.50687	4.4449e-18	DOWN
PTPRN	-2.50451	2.74392e-31	DOWN
GAP43	-2.50234	9.04882e-26	DOWN
THEM5	-2.50141	3.4374e-24	DOWN
RAET1E	-2.50139	4.98728e-28	DOWN
GJB6	-2.50065	4.48824e-13	DOWN
SLC39A2	-2.49321	6.48259e-19	DOWN
QRFPR	-2.48744	1.35279e-15	DOWN
ITGB6	-2.48527	4.08092e-21	DOWN
GRID2	-2.48523	1.42732e-11	DOWN
CBLN2	-2.48106	3.03615e-21	DOWN
FOXQ1	-2.47866	3.7176e-23	DOWN
ELMOD1	-2.46664	1.62569e-21	DOWN
SYT8	-2.46058	5.65204e-15	DOWN
ATP12A	-2.45365	2.15787e-18	DOWN
IGF2BP1	-2.45255	3.52664e-18	DOWN
CAPNS2	-2.44667	1.1103e-23	DOWN
MMP3	-2.4466	3.06841e-20	DOWN
OVOL1	-2.44201	2.48407e-21	DOWN
IL20RB	-2.43497	3.6348e-38	DOWN
TP63	-2.43489	1.07668e-25	DOWN
MS4A15	-2.43097	1.18955e-09	DOWN
UNC5D	-2.42854	7.29587e-18	DOWN
CSMD3	-2.4284	1.44524e-16	DOWN
PRB2	-2.42368	9.13386e-06	DOWN
HTN3	-2.41963	0.000402179	DOWN
SCEL	-2.4158	3.03242e-13	DOWN
PIWIL1	-2.4137	1.57376e-10	DOWN
LAD1	-2.39435	6.827e-26	DOWN
CACNG7	-2.39269	7.41768e-07	DOWN
PPBP	-2.38517	6.43901e-13	DOWN
HOXD11	-2.37903	8.58836e-21	DOWN
HAPLN1	-2.3717	1.69738e-15	DOWN
IL11	-2.37033	3.40257e-24	DOWN
PGC	-2.36976	2.18344e-08	DOWN
LRP1B	-2.35716	7.09891e-15	DOWN
PNPLA1	-2.3531	2.10717e-20	DOWN
LRRTM3	-2.35234	2.77594e-09	DOWN
PTN	-2.34437	6.29053e-31	DOWN
FAT3	-2.34421	4.96125e-29	DOWN
RNF222	-2.33566	9.25031e-14	DOWN
ADCY8	-2.33368	6.00062e-11	DOWN
SCNN1G	-2.32333	7.57003e-11	DOWN
NOS1	-2.31959	2.15107e-12	DOWN
NTSR1	-2.31893	4.71115e-25	DOWN
COL2A1	-2.3178	2.0428e-18	DOWN
OR7E91P	-2.3126	1.87943e-07	DOWN
DUOXA2	-2.30821	7.88484e-13	DOWN
CLEC2A	-2.30458	8.0332e-06	DOWN
COL20A1	-2.30377	1.42583e-09	DOWN
NEFM	-2.30302	5.92014e-19	DOWN
TMEM132D	-2.30111	2.95676e-08	DOWN
ST8SIA5	-2.29397	9.50955e-22	DOWN
HMX1	-2.28411	4.9994e-08	DOWN
CEACAM6	-2.28409	7.91216e-11	DOWN
COL4A6	-2.28307	2.09746e-27	DOWN
ARMC4	-2.27982	1.01822e-10	DOWN
NDP	-2.2798	1.72551e-19	DOWN
KANK4	-2.27312	9.86302e-23	DOWN
TP53AIP1	-2.26988	3.8901e-20	DOWN
LCE2A	-2.26508	1.05769e-13	DOWN
SULT1E1	-2.2623	5.45761e-07	DOWN
MSMP	-2.26189	4.84531e-24	DOWN
FGF10	-2.25679	1.14932e-11	DOWN
DEFB1	-2.25179	2.27486e-13	DOWN
GABRA4	-2.24547	2.58849e-08	DOWN
NDST3	-2.24453	4.42712e-20	DOWN
S100P	-2.23907	1.21176e-21	DOWN
REN	-2.23783	3.16045e-11	DOWN
DCX	-2.2309	4.49415e-13	DOWN
ZFP42	-2.22788	6.28039e-10	DOWN
SLC5A1	-2.22227	3.96404e-14	DOWN
CYP4F2	-2.22121	2.43613e-09	DOWN
PYDC1	-2.21767	2.17903e-05	DOWN
SH3RF2	-2.20391	8.79046e-19	DOWN
CLDN4	-2.19587	4.43834e-25	DOWN
SPHKAP	-2.19252	2.61934e-08	DOWN
RTL1	-2.19033	1.39183e-07	DOWN
AADACL3	-2.17808	0.0440175	DOWN
TFAP2B	-2.17527	1.14716e-08	DOWN
RELN	-2.16256	6.68504e-21	DOWN
STMN2	-2.16252	9.92218e-21	DOWN
C6orf15	-2.15885	6.88552e-06	DOWN
PCK1	-2.15602	1.23823e-10	DOWN
SCGN	-2.15196	5.22239e-07	DOWN
CA10	-2.14636	6.76329e-10	DOWN
GJB2	-2.14317	1.47085e-18	DOWN
AQP5	-2.14283	3.52501e-15	DOWN
GRIA2	-2.14114	2.91997e-09	DOWN
SPANXC	-2.13041	0.000745765	DOWN
SLC18A3	-2.13002	1.24714e-06	DOWN
CYP24A1	-2.12733	3.9953e-14	DOWN
VIT	-2.12532	8.77413e-17	DOWN
CYP4F3	-2.12202	3.63509e-14	DOWN
CSF3	-2.12066	6.90514e-10	DOWN
CRABP2	-2.11617	6.79972e-31	DOWN
AQP3	-2.11315	4.29225e-23	DOWN
KCNA4	-2.11235	2.77087e-10	DOWN
EPHX3	-2.11119	1.86346e-24	DOWN
SLC26A9	-2.10926	8.59936e-20	DOWN
LMO1	-2.10848	1.24228e-17	DOWN
CLDN17	-2.10806	0.000886438	DOWN
NGEF	-2.10799	1.21521e-21	DOWN
SLITRK6	-2.10726	1.86961e-16	DOWN
DSC2	-2.10378	5.95063e-28	DOWN
GRIA4	-2.09978	3.34689e-17	DOWN
AGR3	-2.09776	0.0338404	DOWN
ELSPBP1	-2.09567	3.47889e-05	DOWN
ST8SIA2	-2.08711	2.10831e-15	DOWN
PRSS22	-2.06701	4.17285e-13	DOWN
MEOX2	-2.06629	2.31423e-22	DOWN
DLX2	-2.06619	1.53385e-22	DOWN
GPX2	-2.06606	3.06412e-15	DOWN
CIDEA	-2.06089	3.724e-08	DOWN
KERA	-2.0517	3.86048e-11	DOWN
CXCR1	-2.04221	1.22132e-22	DOWN
SLC10A6	-2.03075	1.19261e-27	DOWN
SOST	-2.02785	4.08963e-08	DOWN
FGFR3	-2.02547	1.91765e-21	DOWN
DAB1	-2.02395	1.3823e-10	DOWN
MMP1	-2.02215	7.17586e-18	DOWN
SFTPD	-2.01971	1.00943e-16	DOWN
ALDH3B2	-2.01441	1.99094e-12	DOWN
XIRP2	-2.01286	3.29356e-14	DOWN
TRHDE	-2.01176	1.09135e-11	DOWN
SYTL5	-2.01167	8.21282e-16	DOWN
CDH22	-2.00411	2.12226e-13	DOWN
